# Supplementary material for: Noise promotes independent control of gamma oscillations and grid firing within recurrent attractor networks
Source: eLife journal article supplement (doi:10.7554/elife.06444), 2015-07-06

**A** $\sigma_{\text{noise}} = 0 \text{ pA}$ 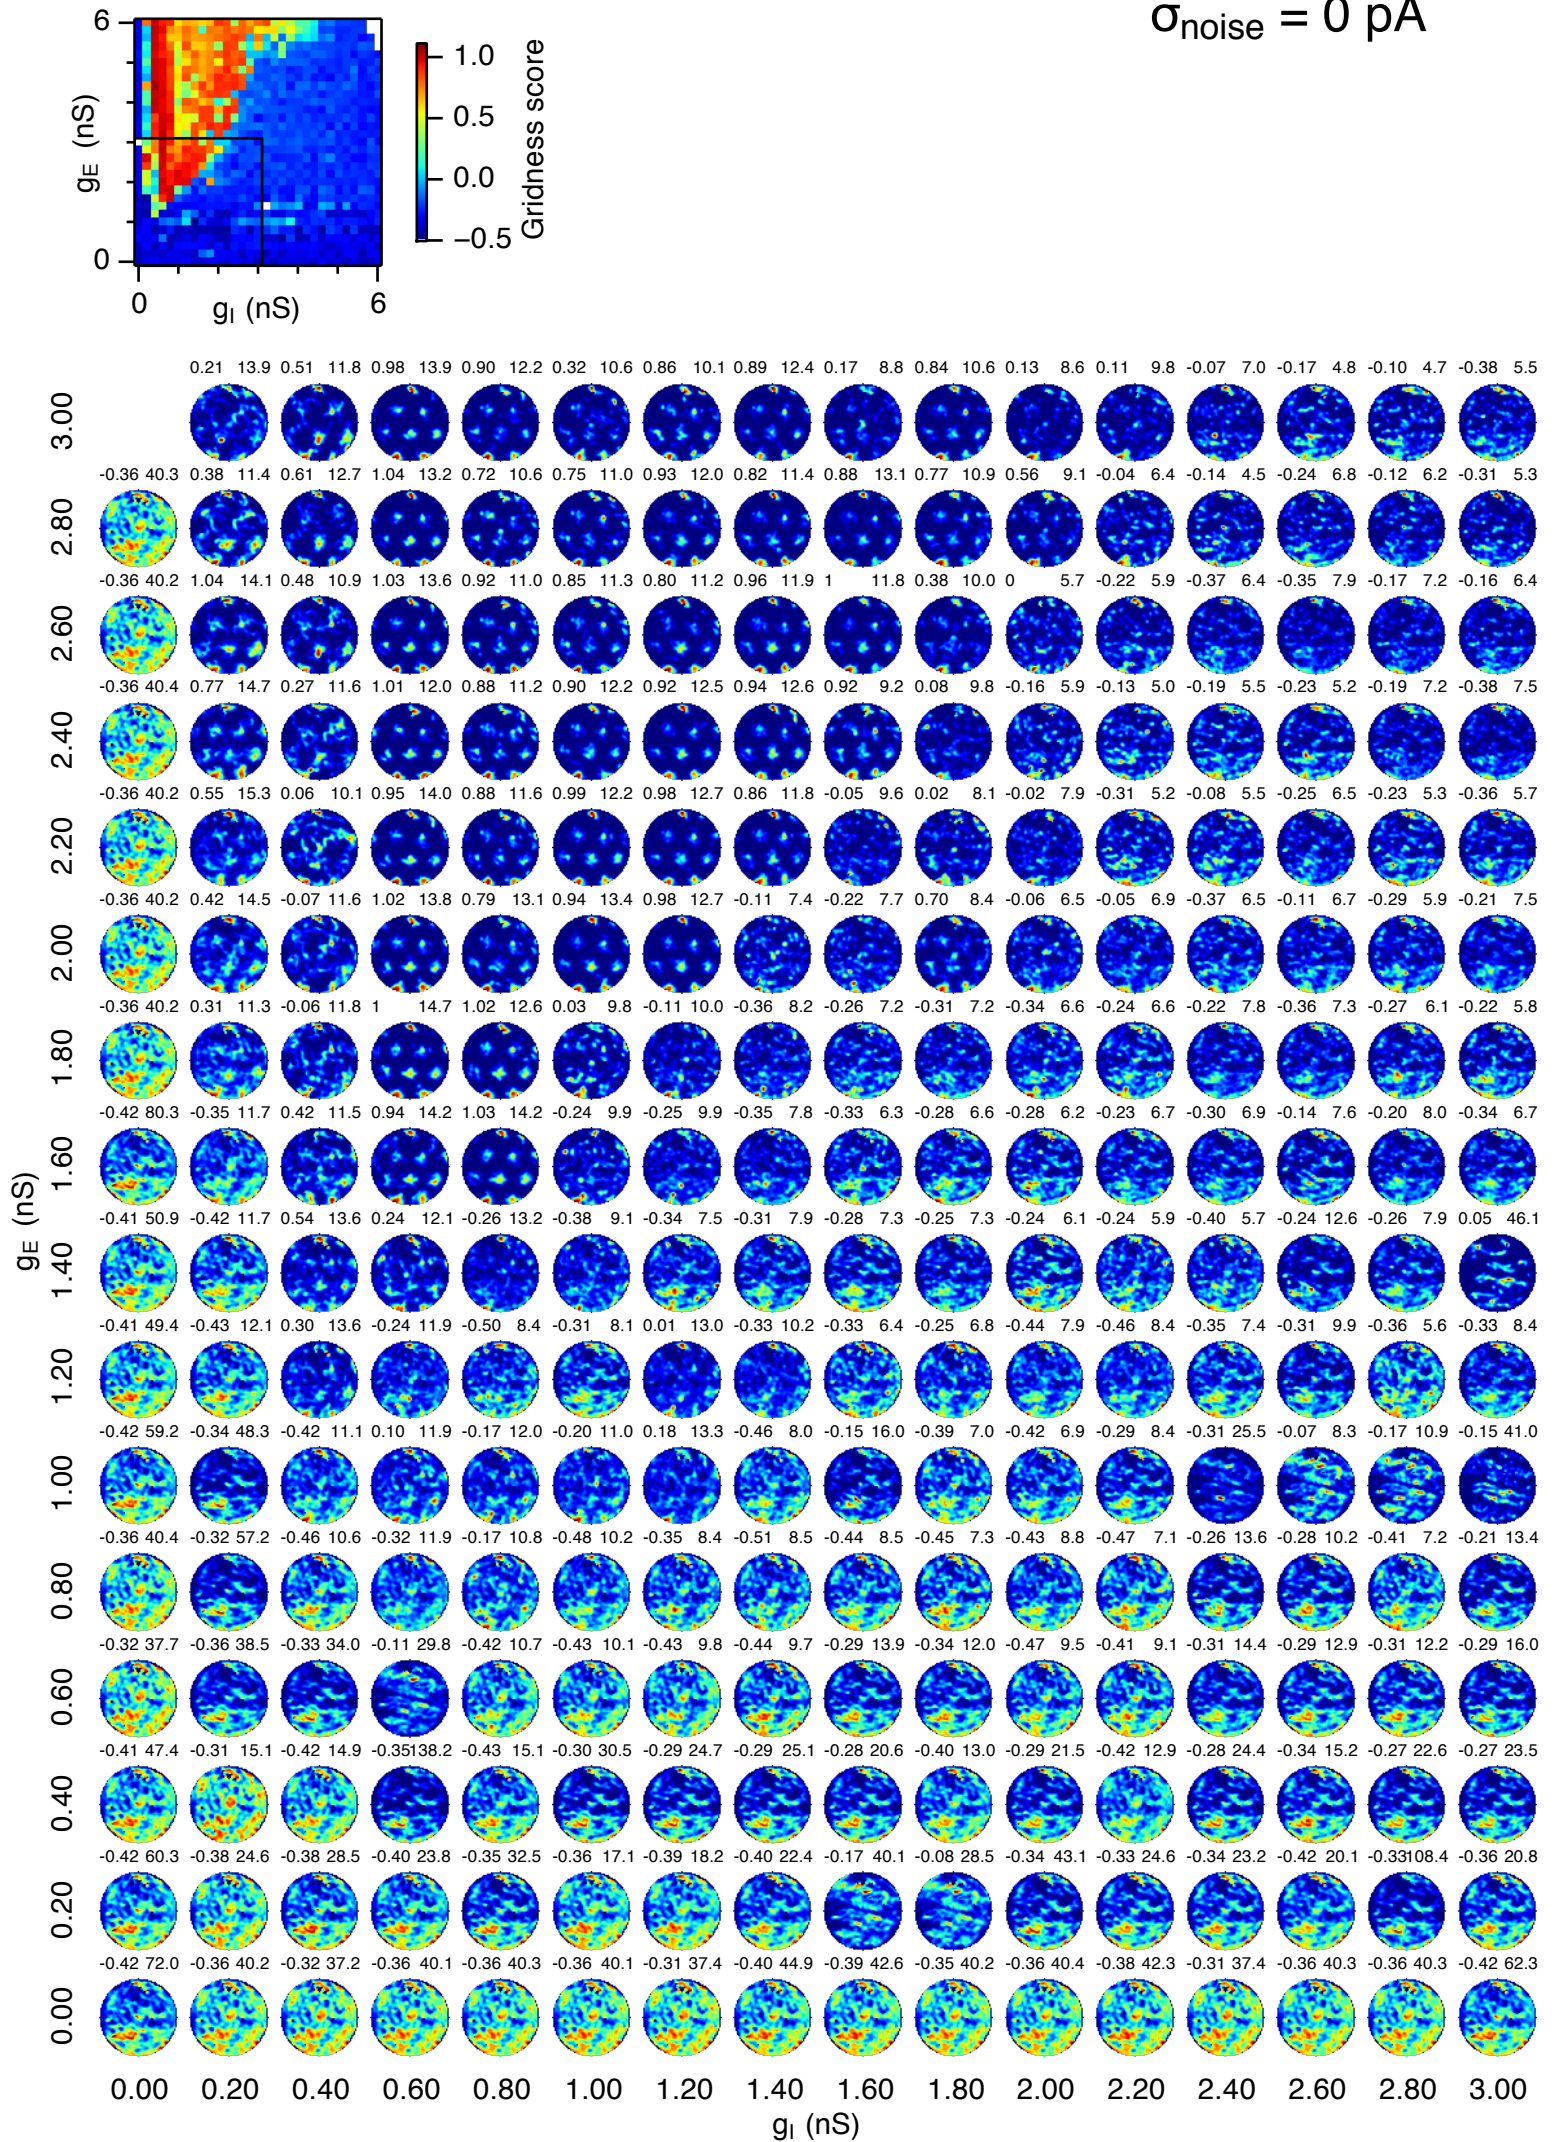



**B**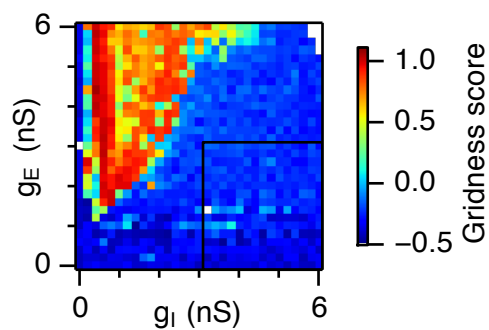 $\sigma_{\text{noise}} = 0$  pA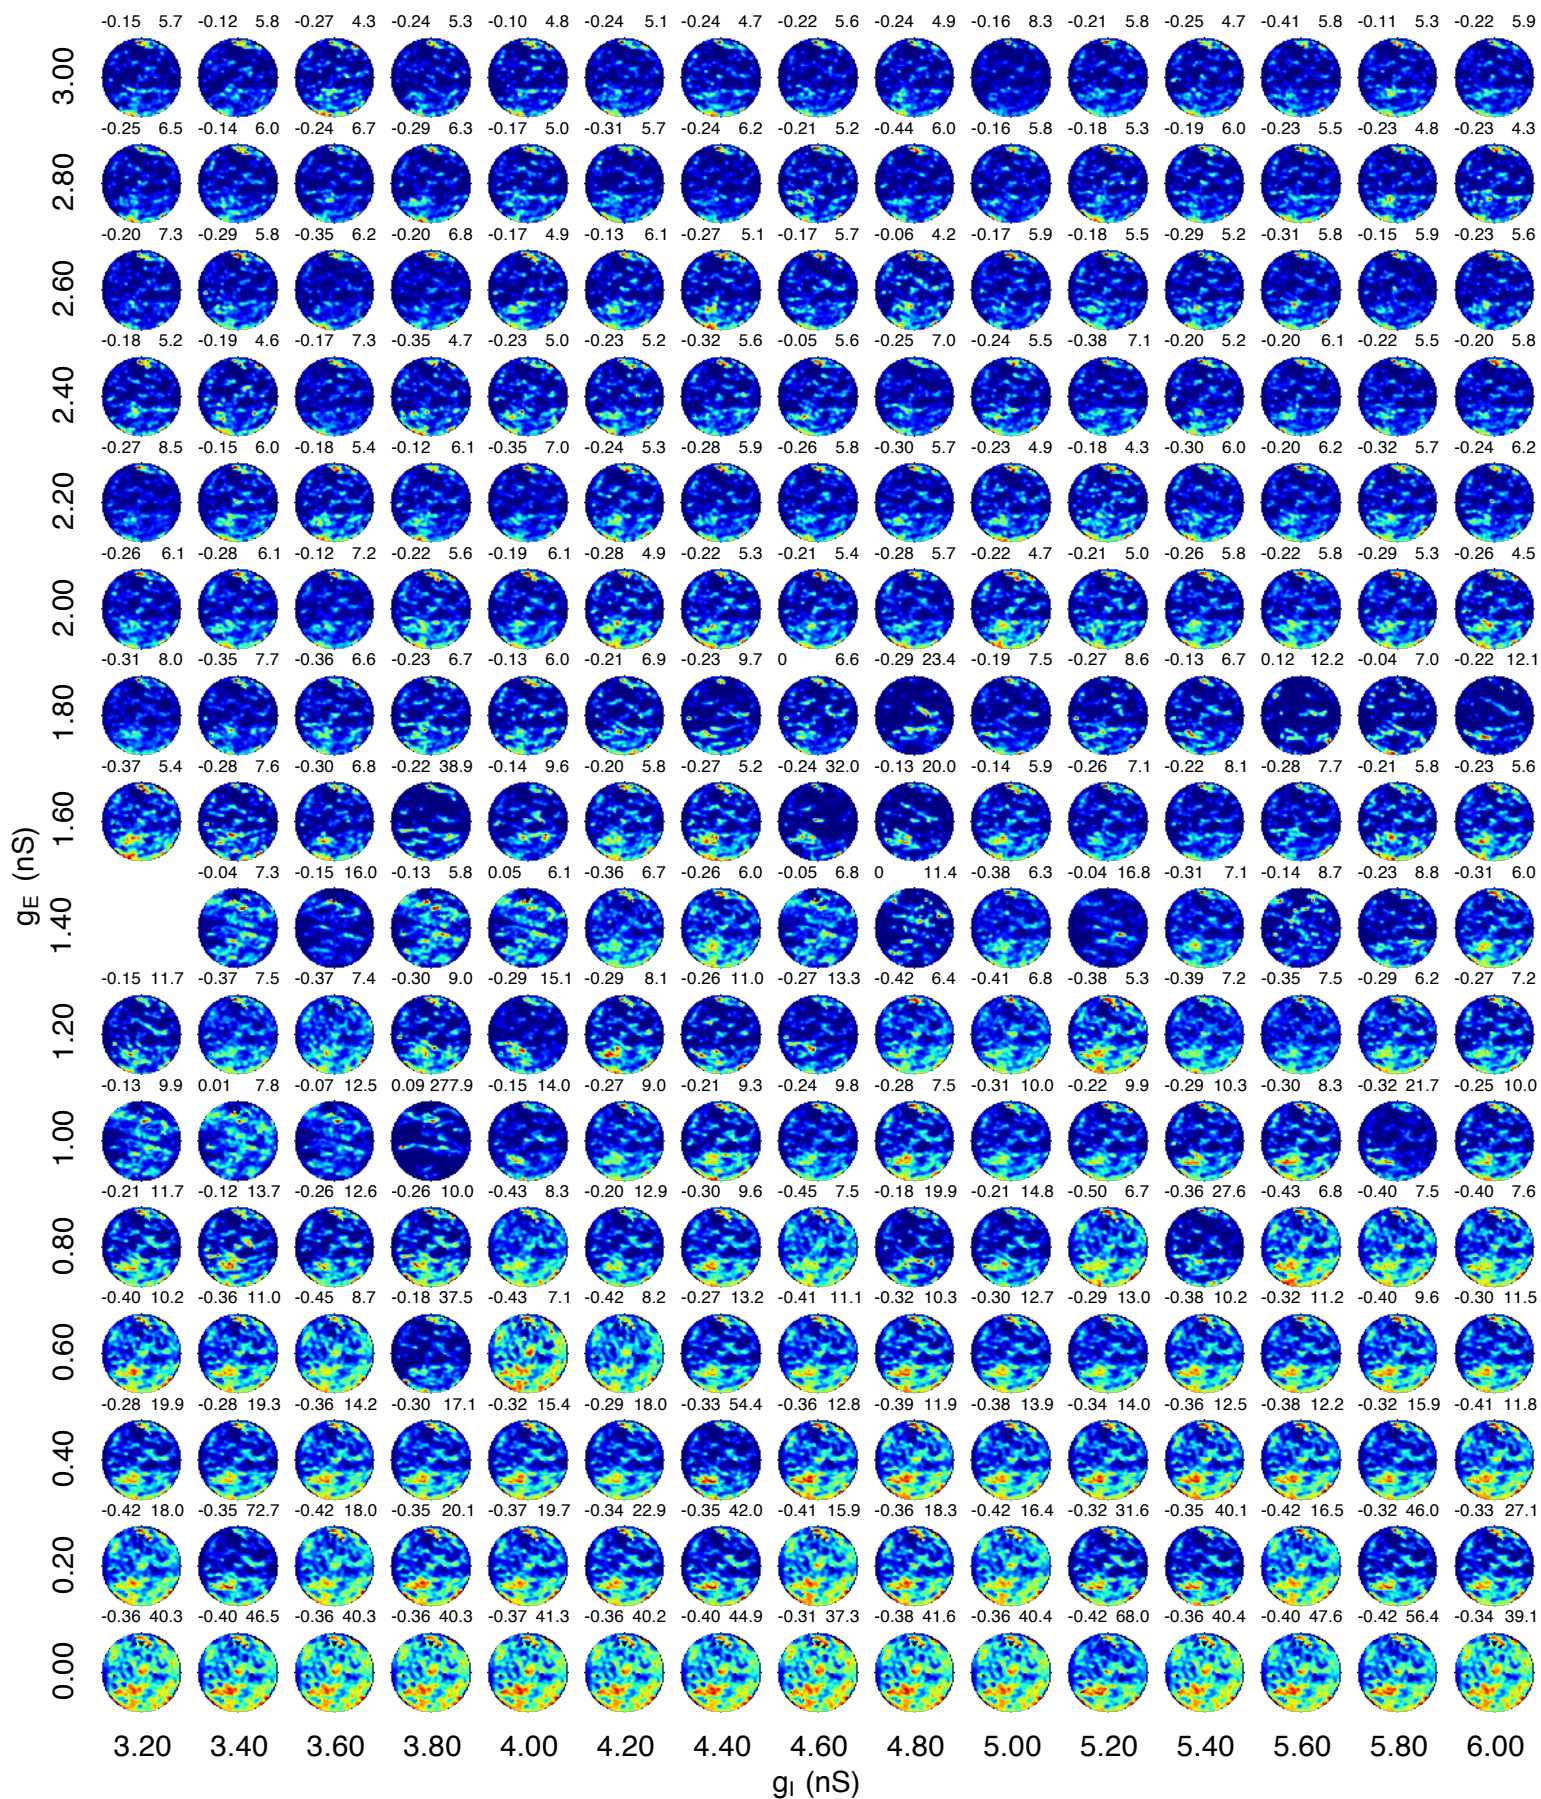



C

 $\sigma_{\text{noise}} = 0 \text{ pA}$ 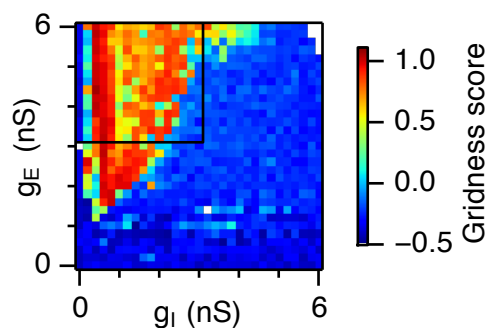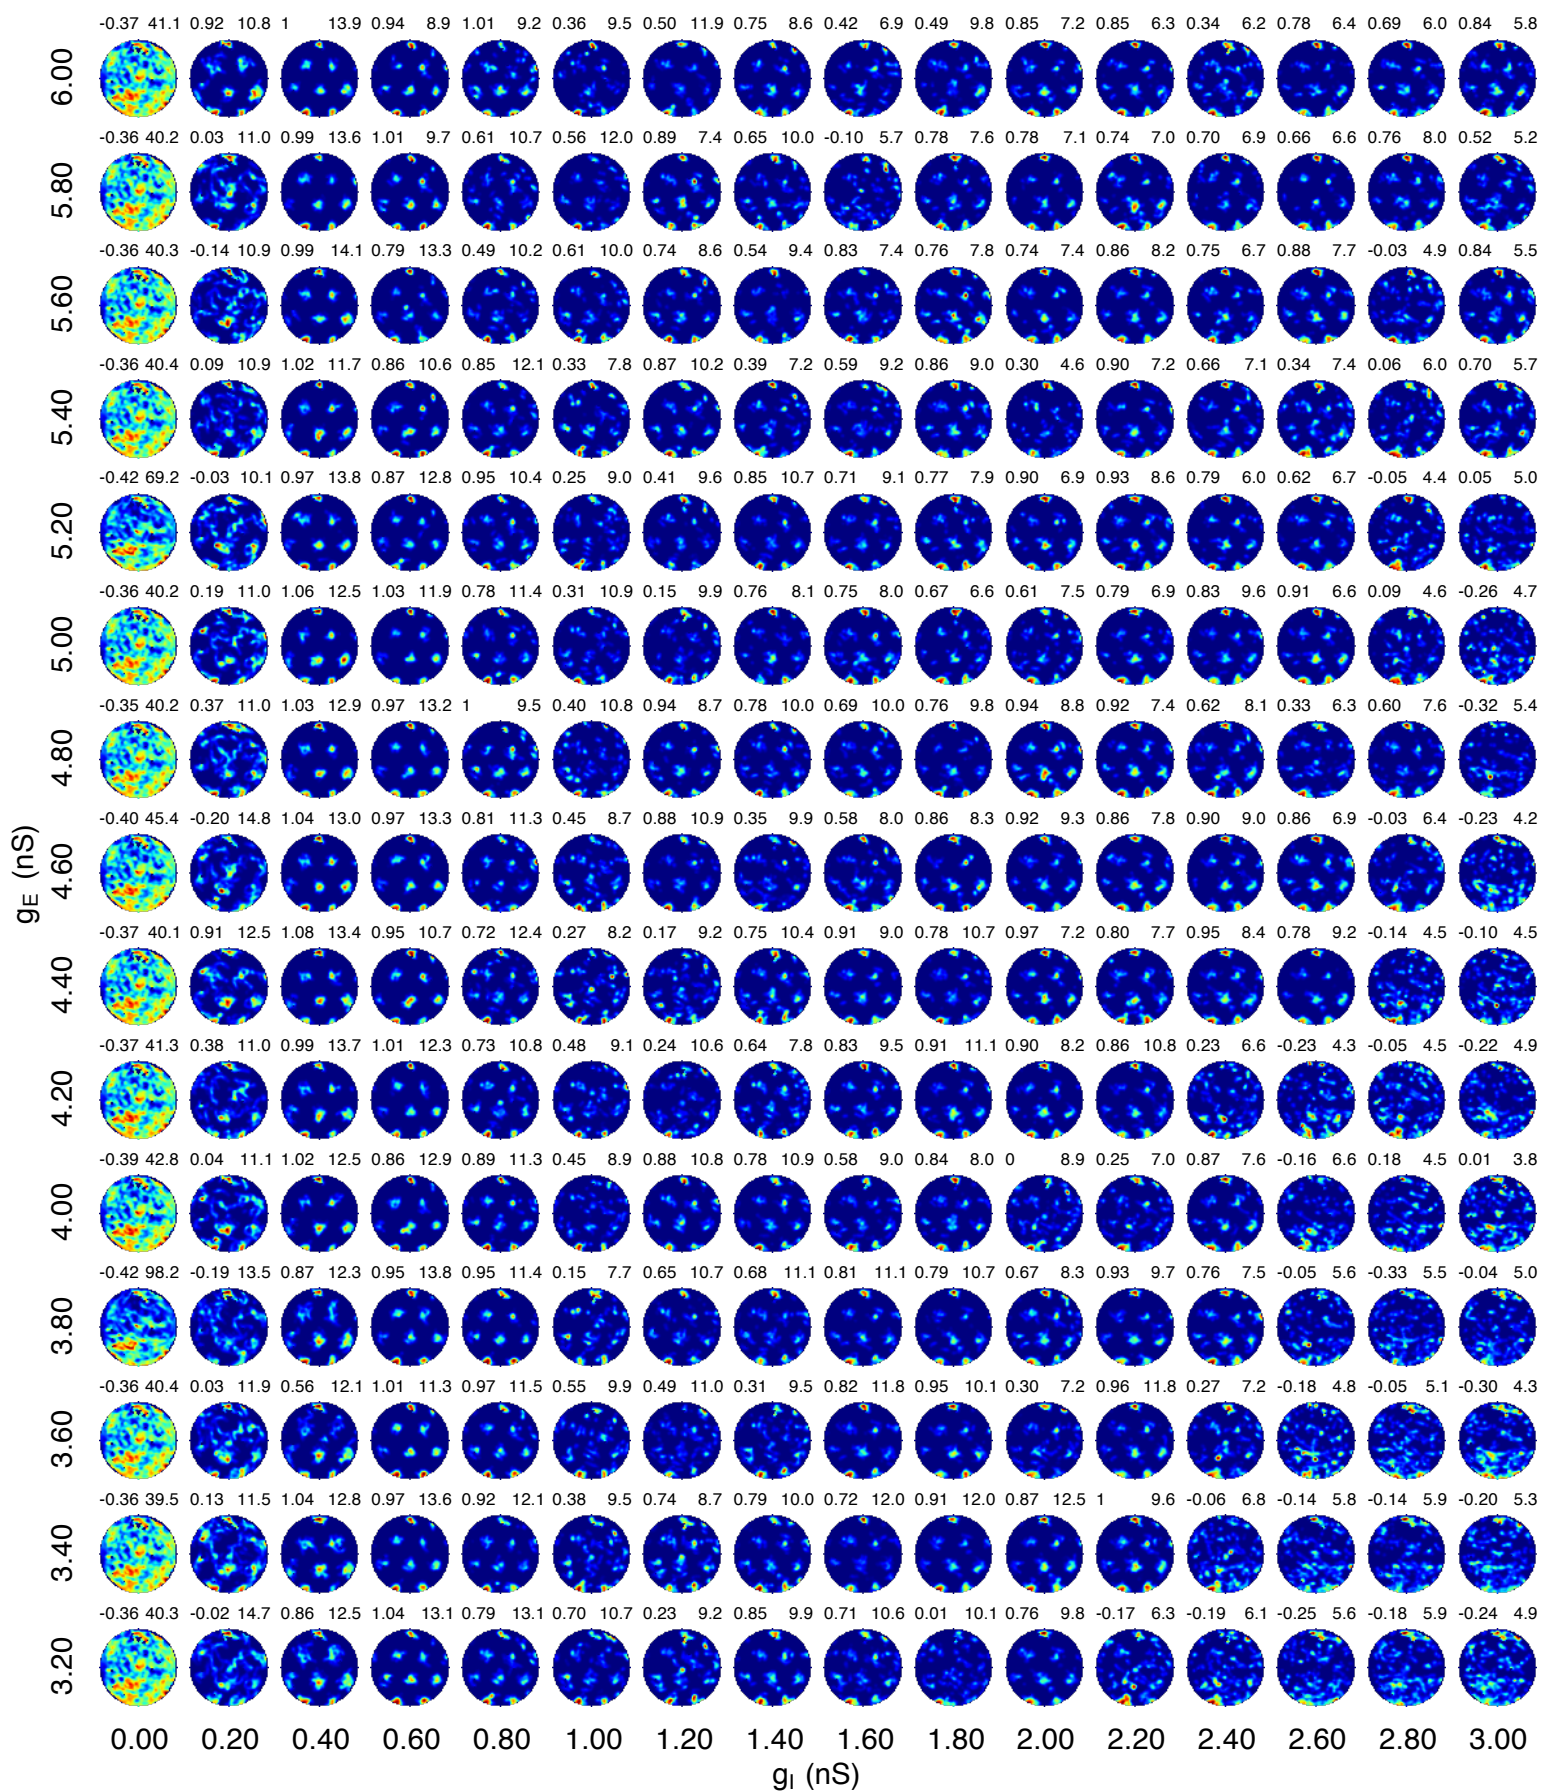



**D** $\sigma_{\text{noise}} = 0 \text{ pA}$ 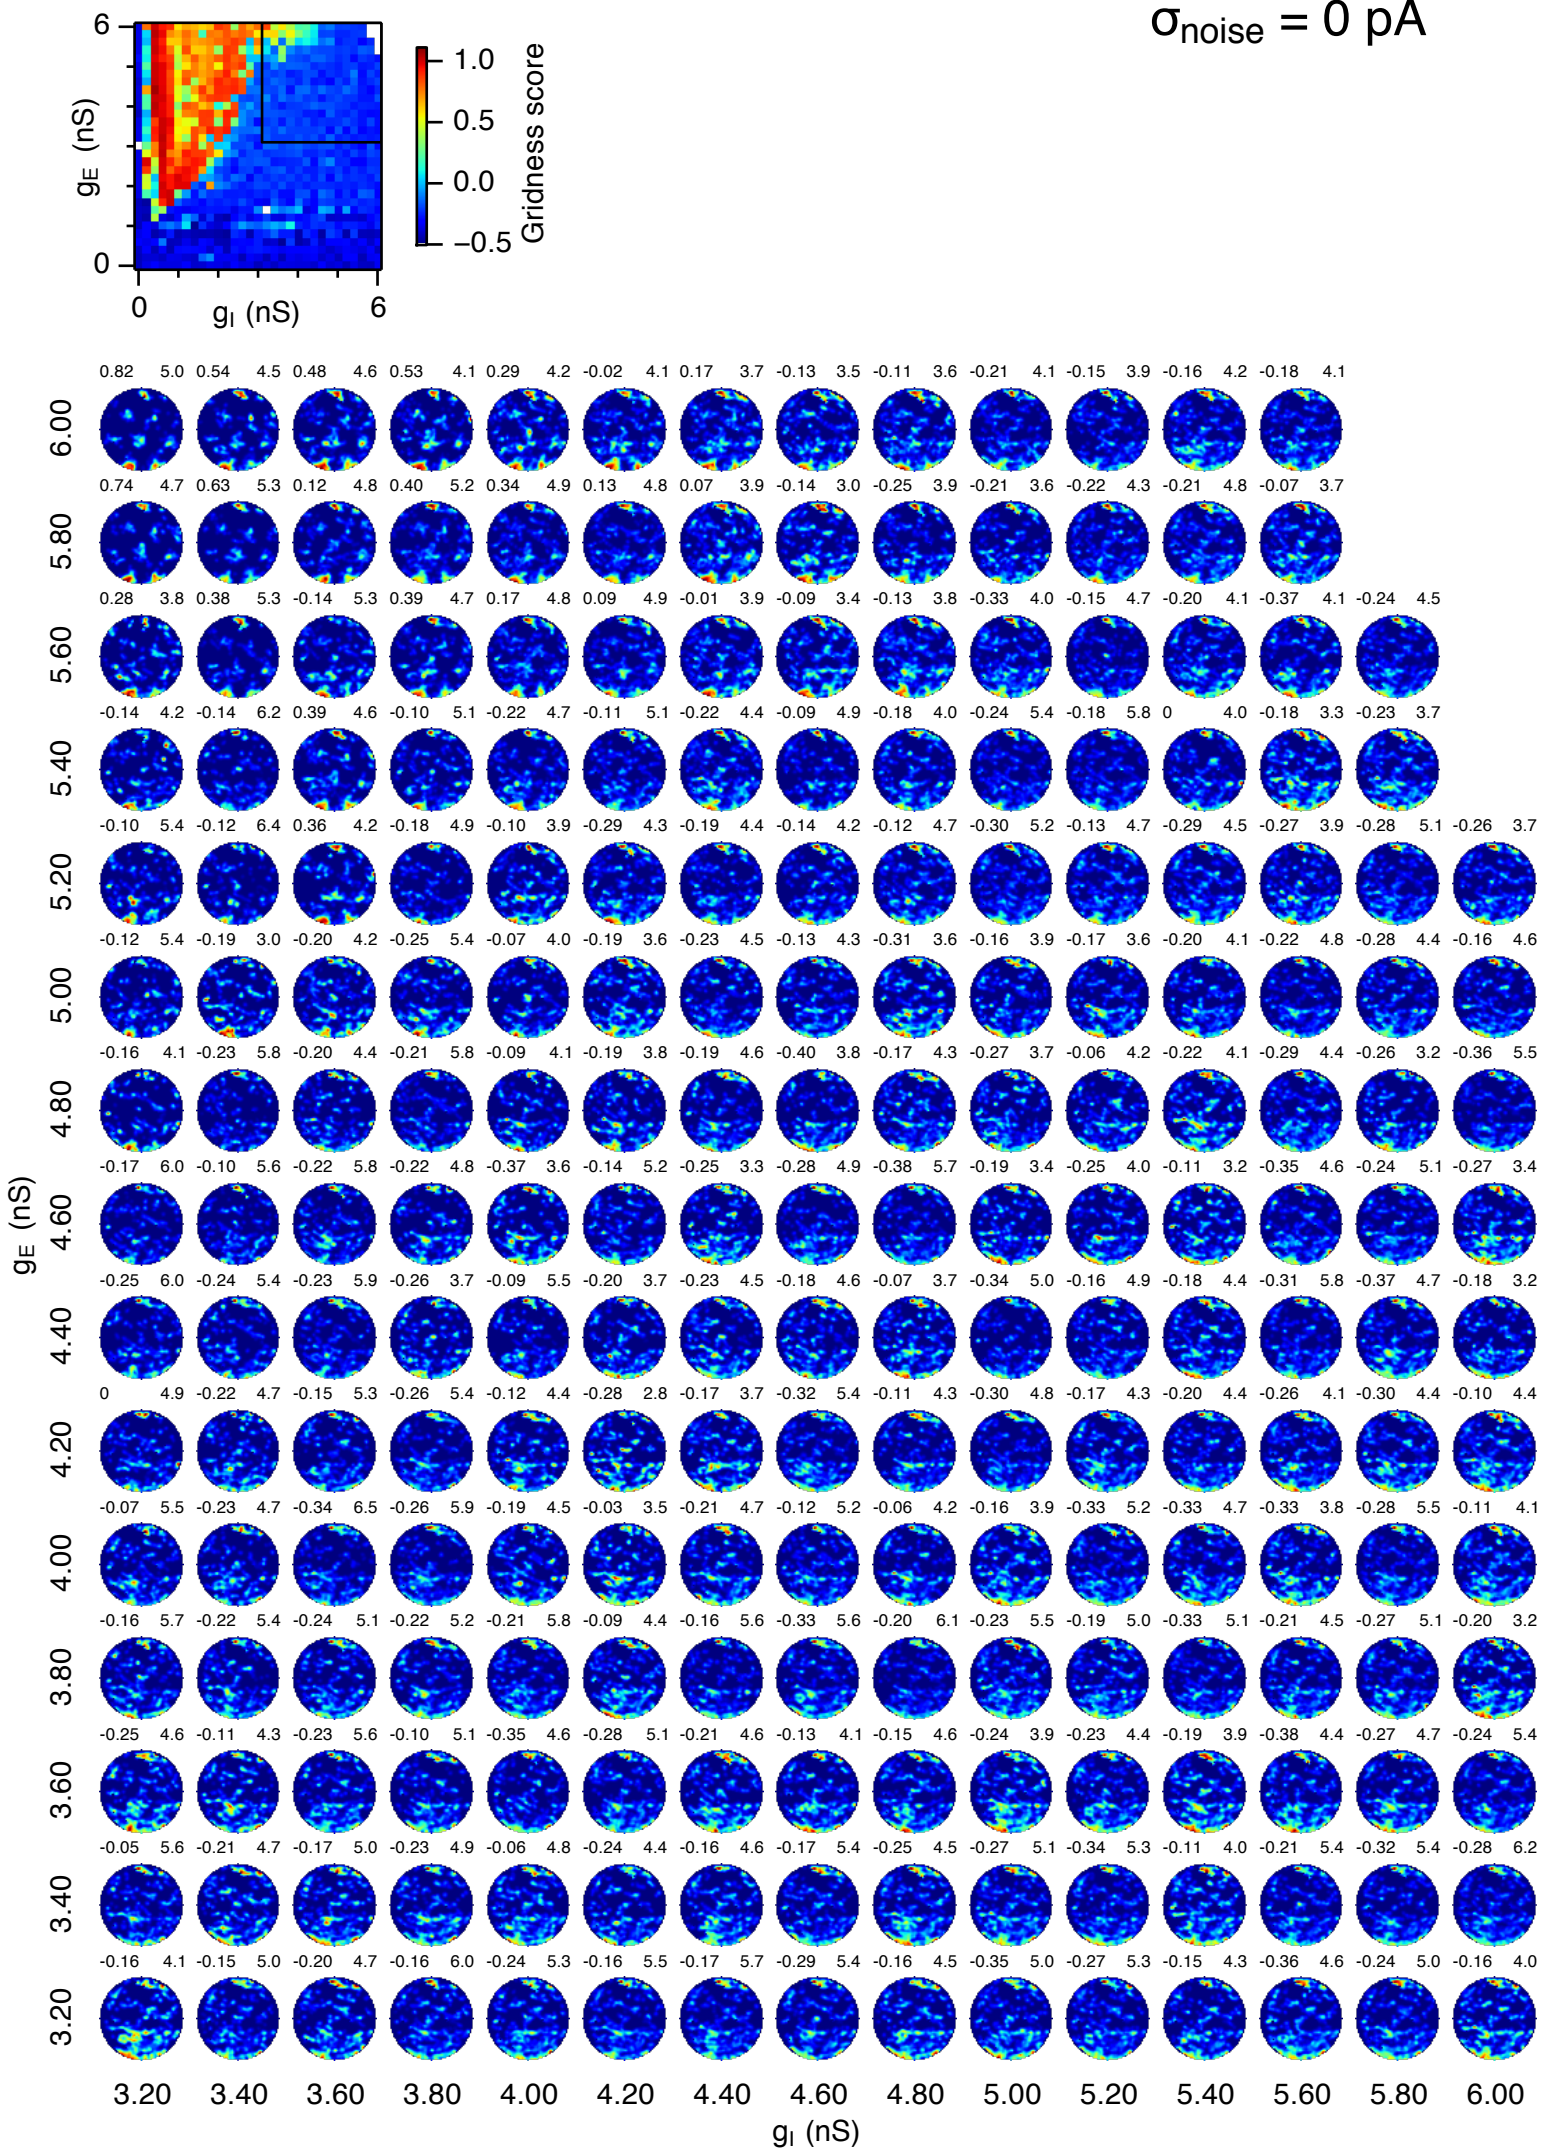



**E**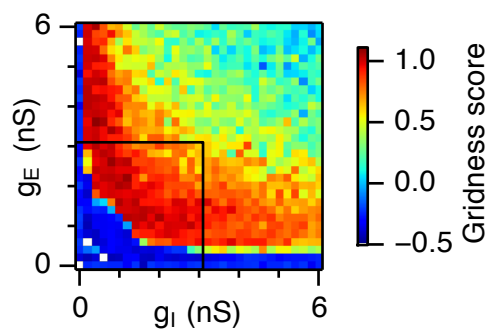 $\sigma_{\text{noise}} = 150 \text{ pA}$ 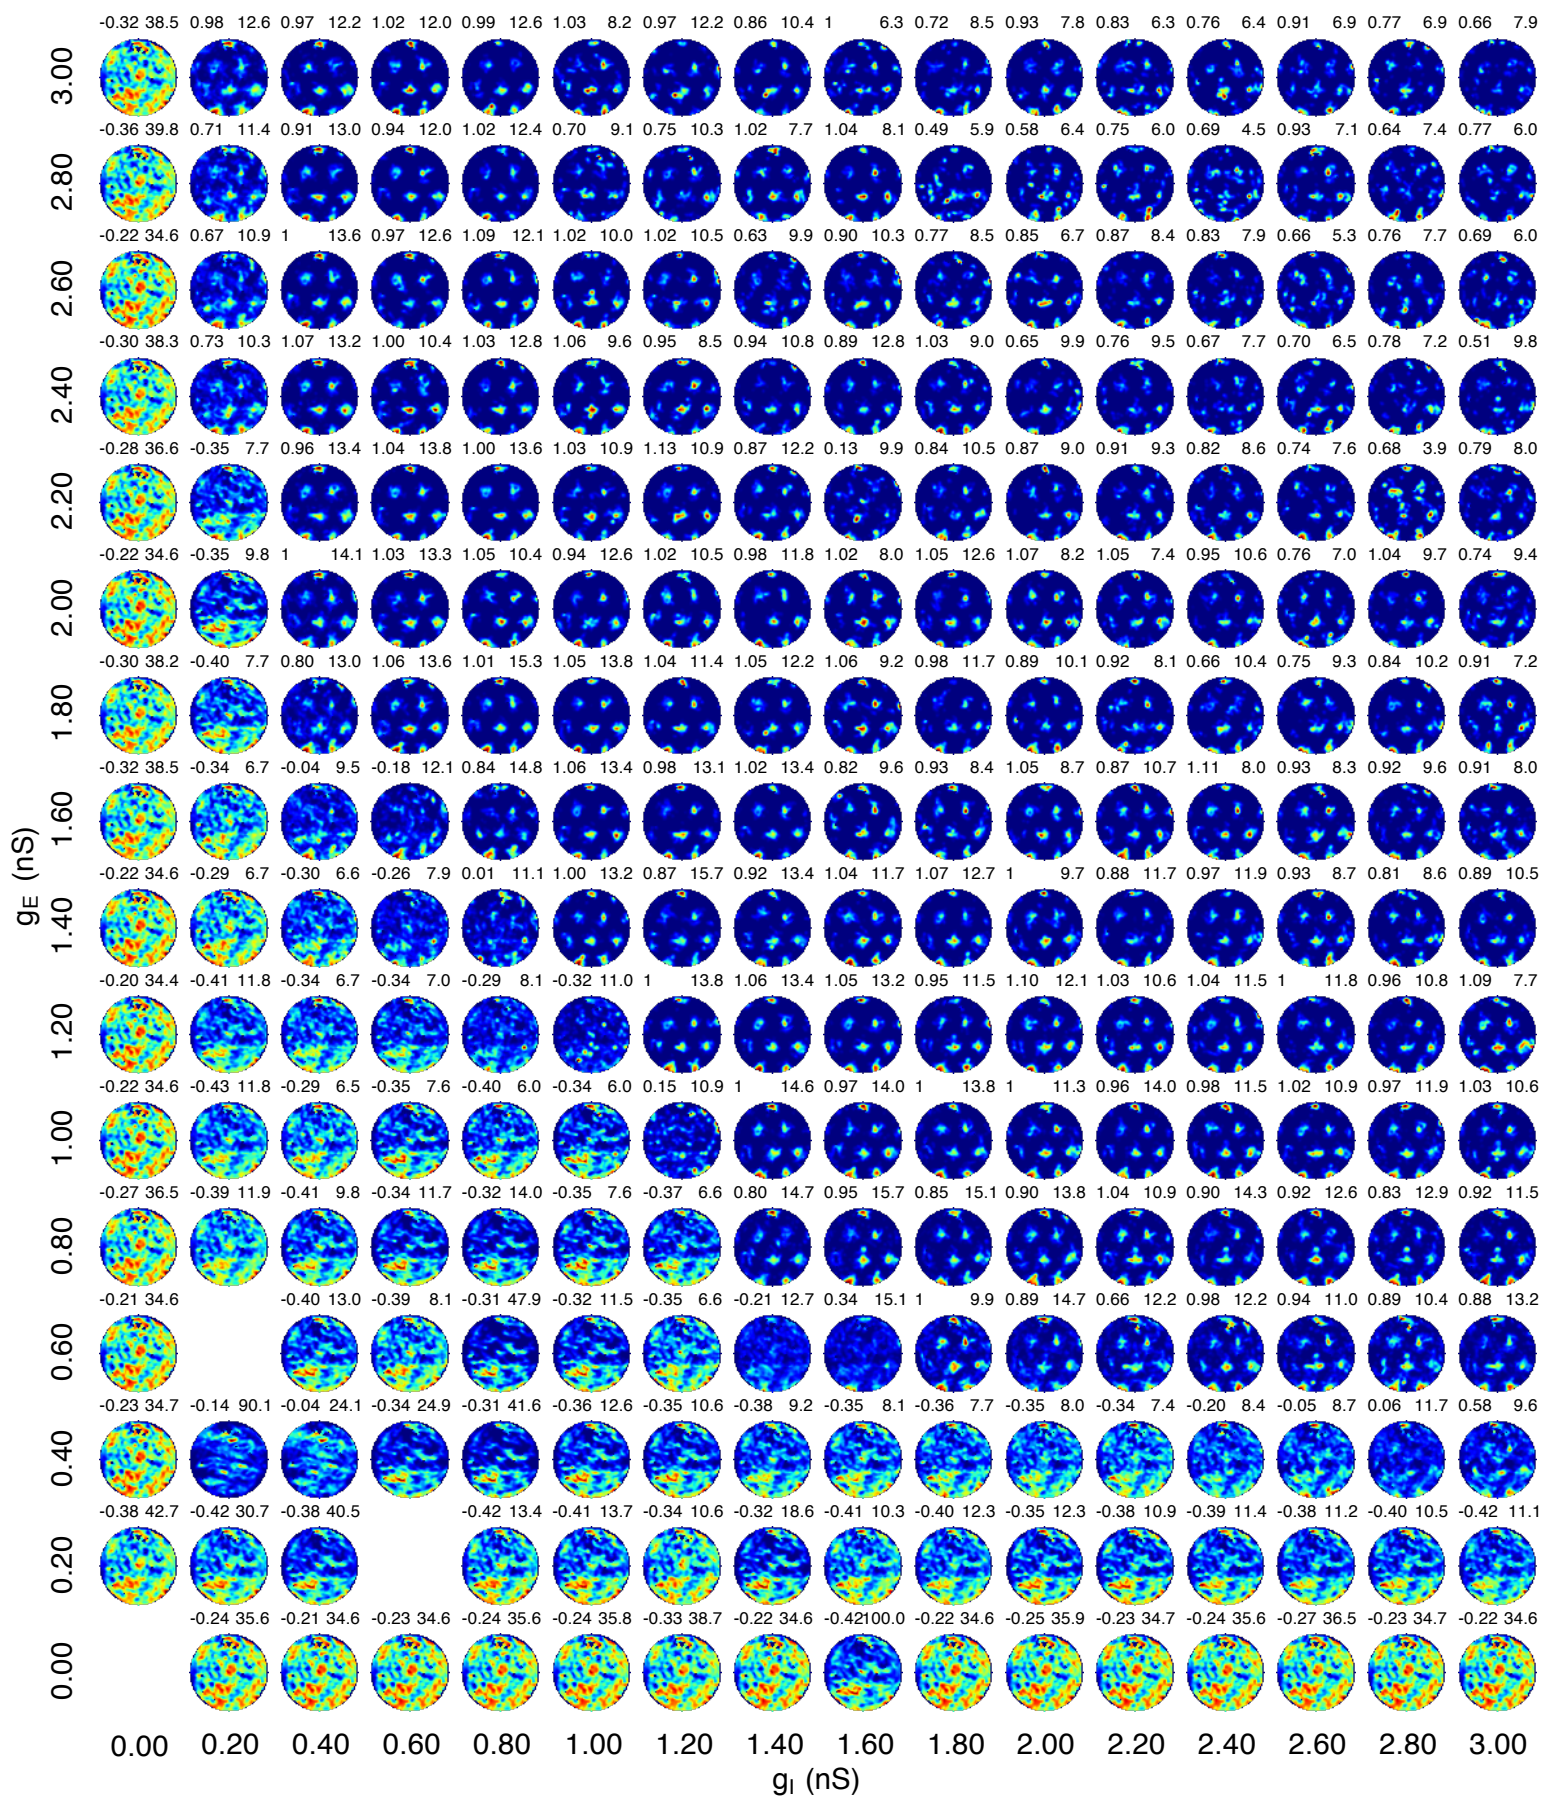



**F**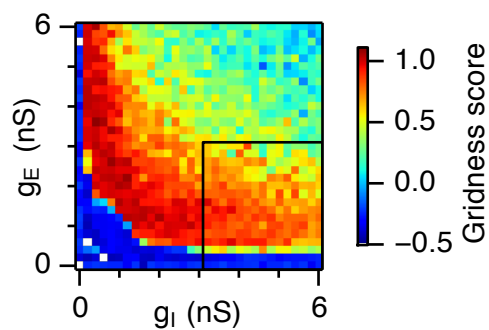 $\sigma_{\text{noise}} = 150 \text{ pA}$ 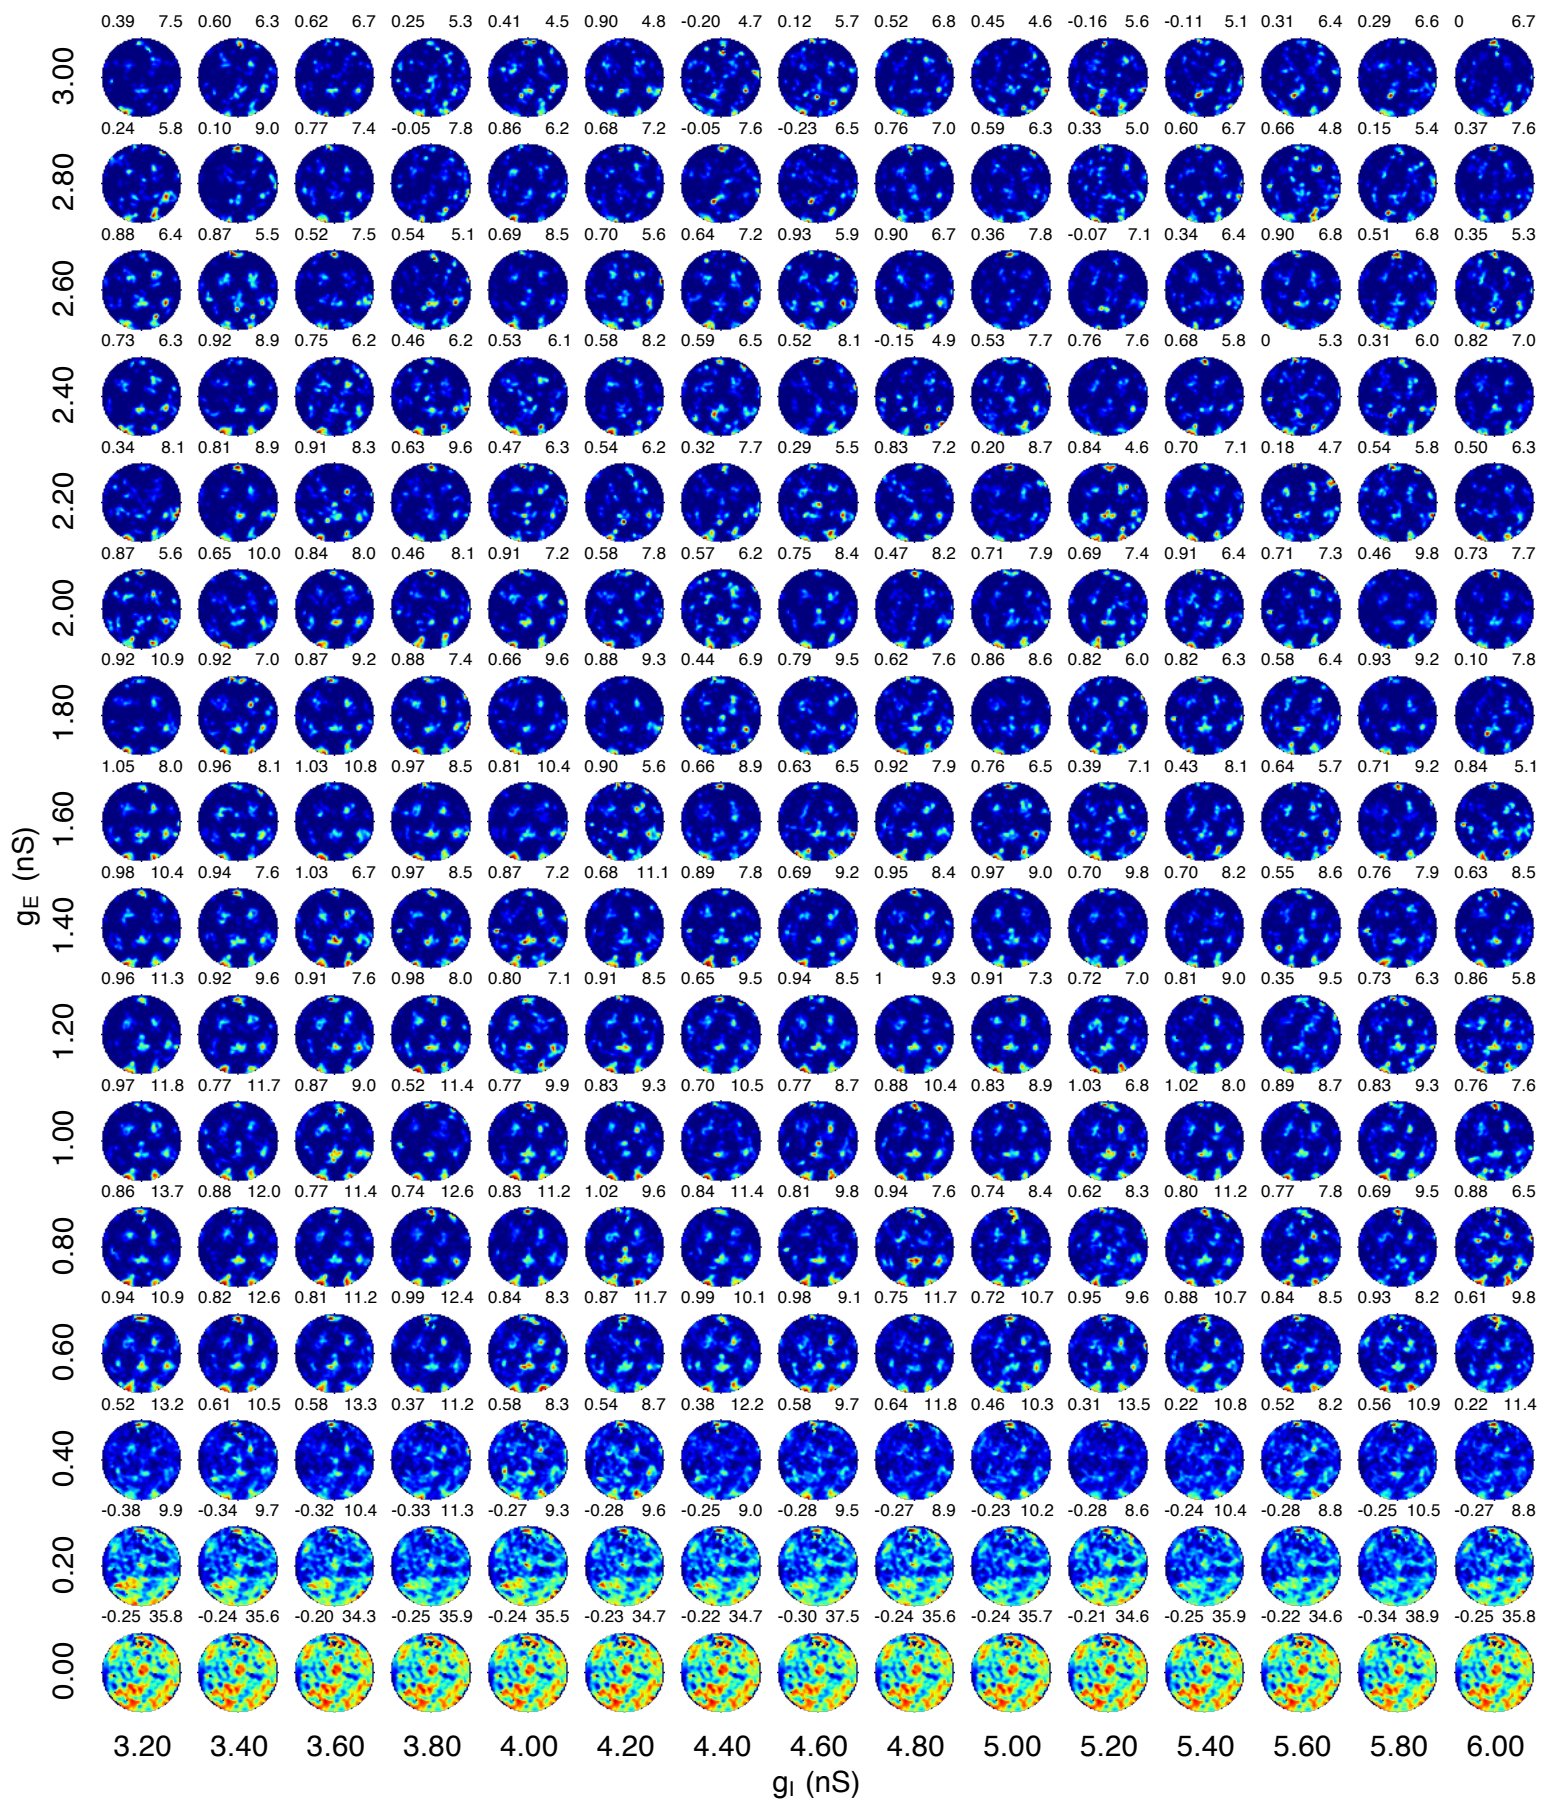



**G** $\sigma_{\text{noise}} = 150 \text{ pA}$ 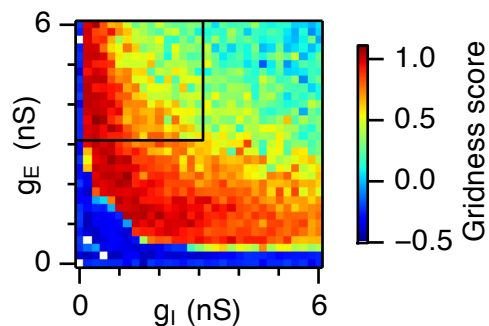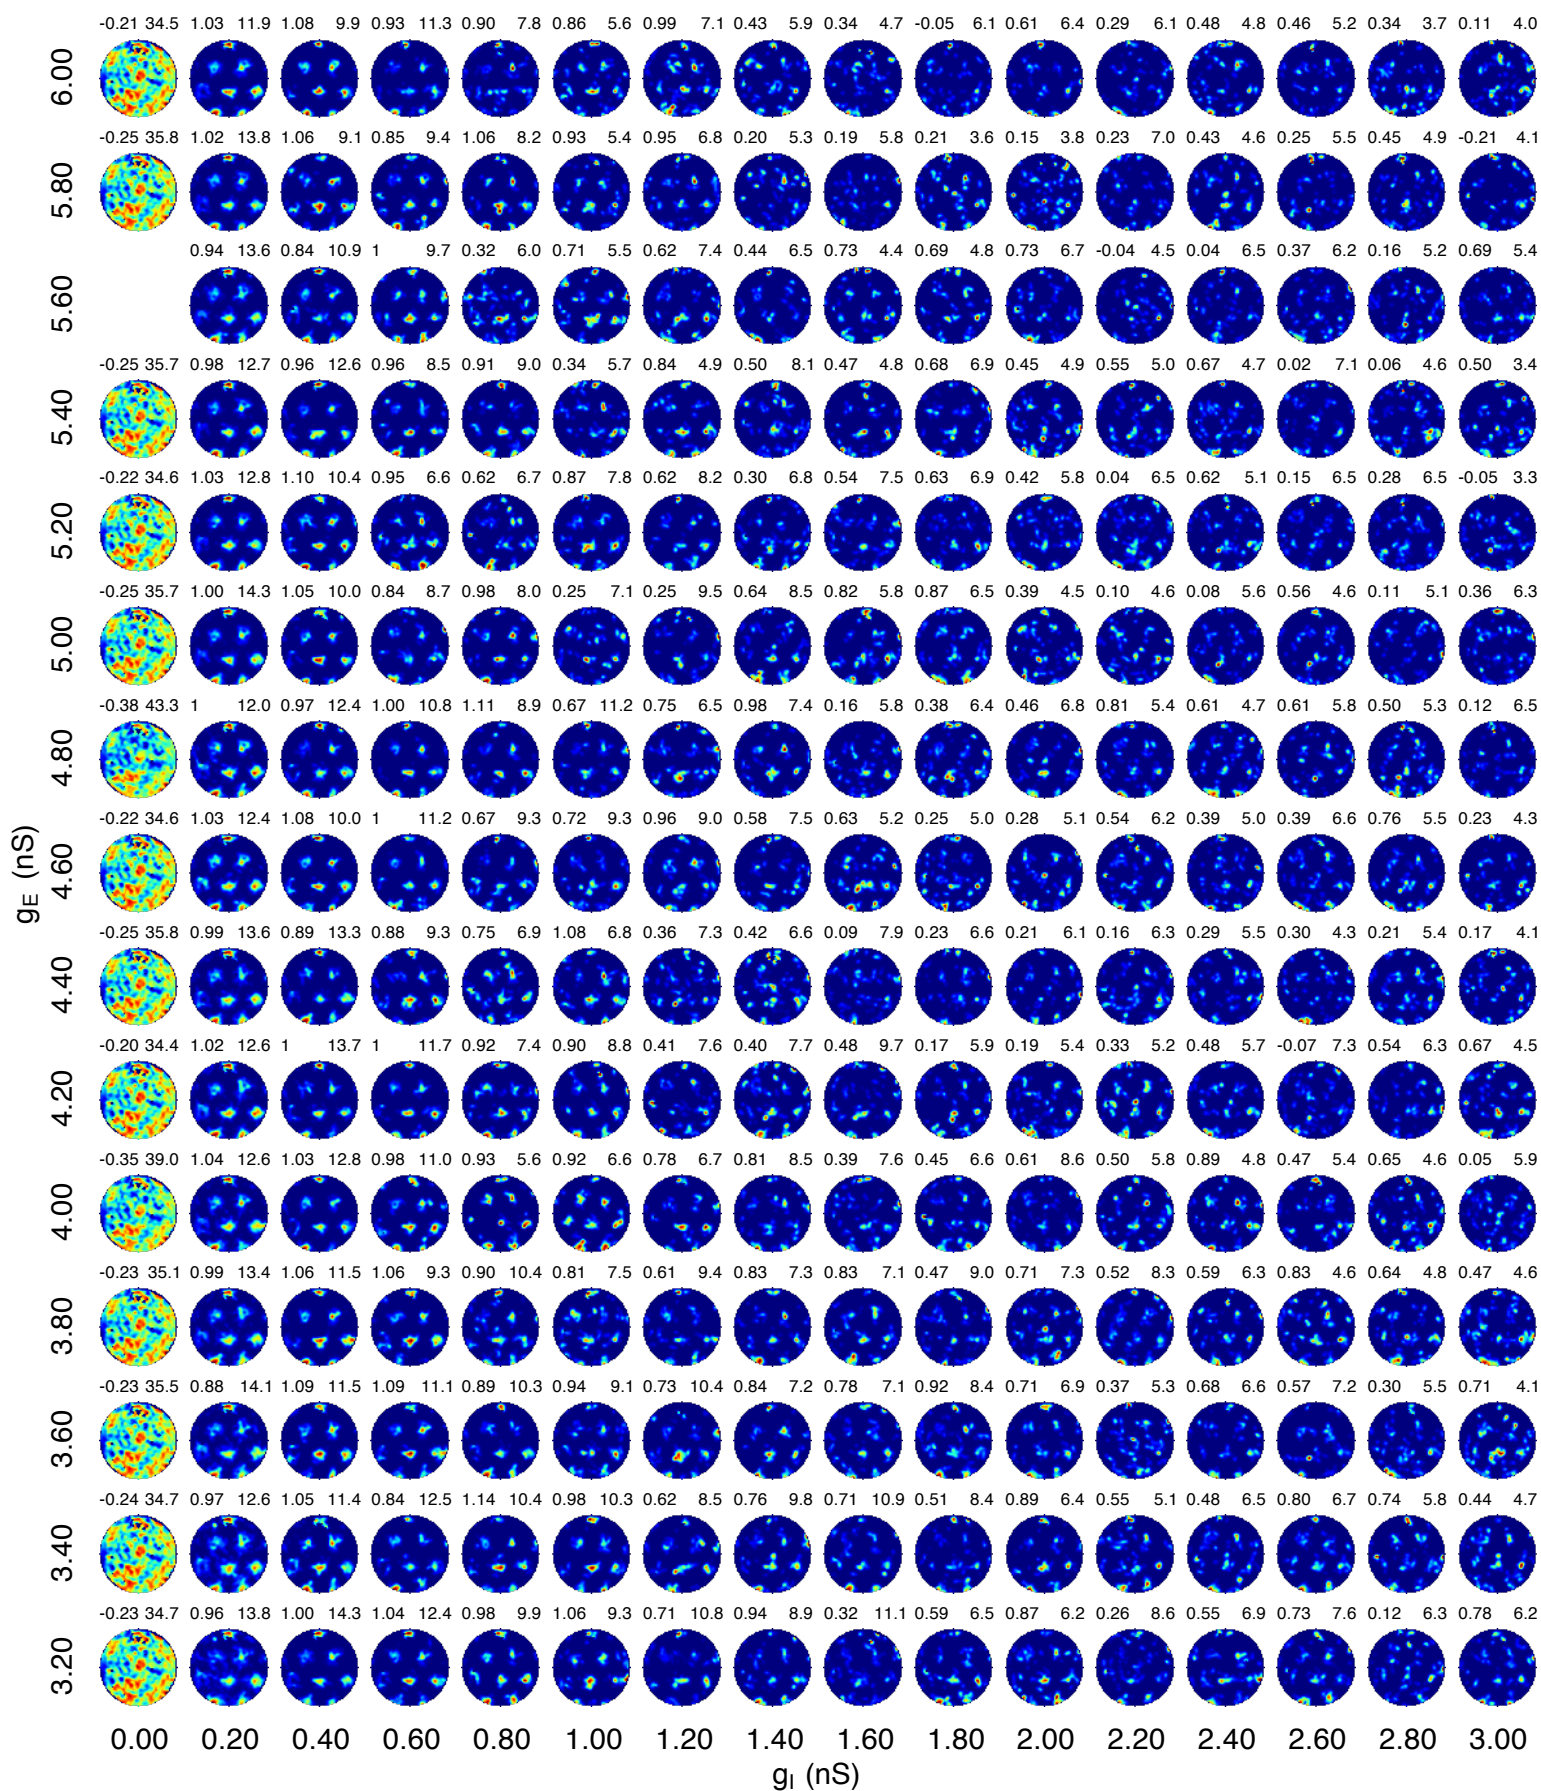



**H**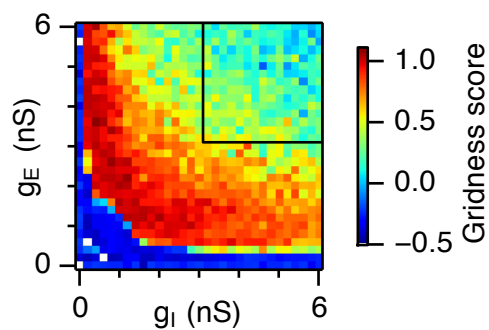 $\sigma_{\text{noise}} = 150 \text{ pA}$ 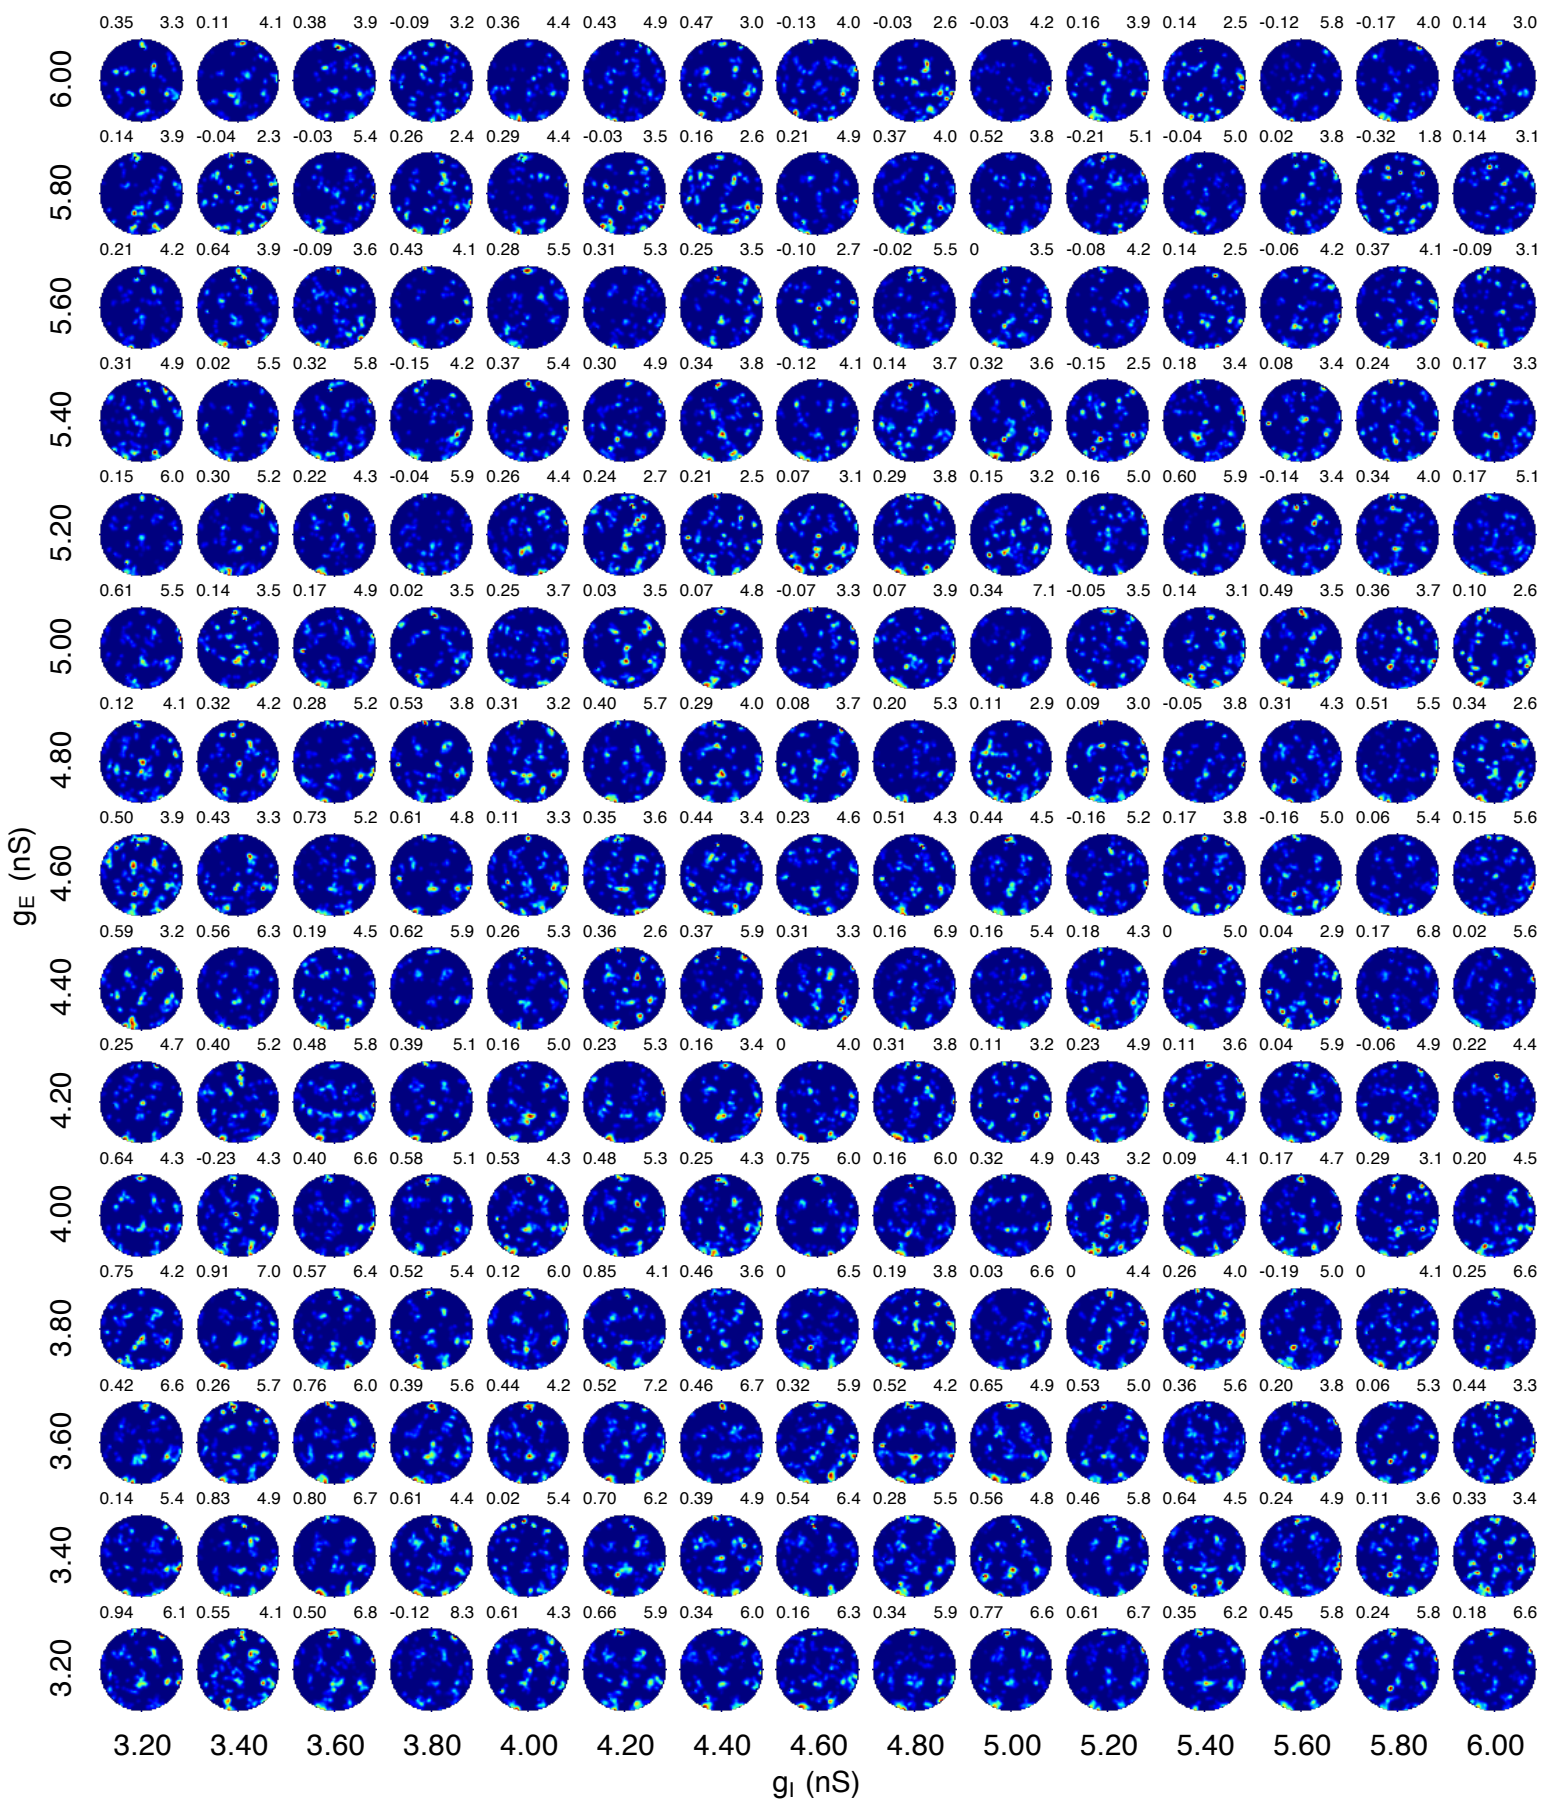



$\sigma_{\text{noise}} = 300 \text{ pA}$

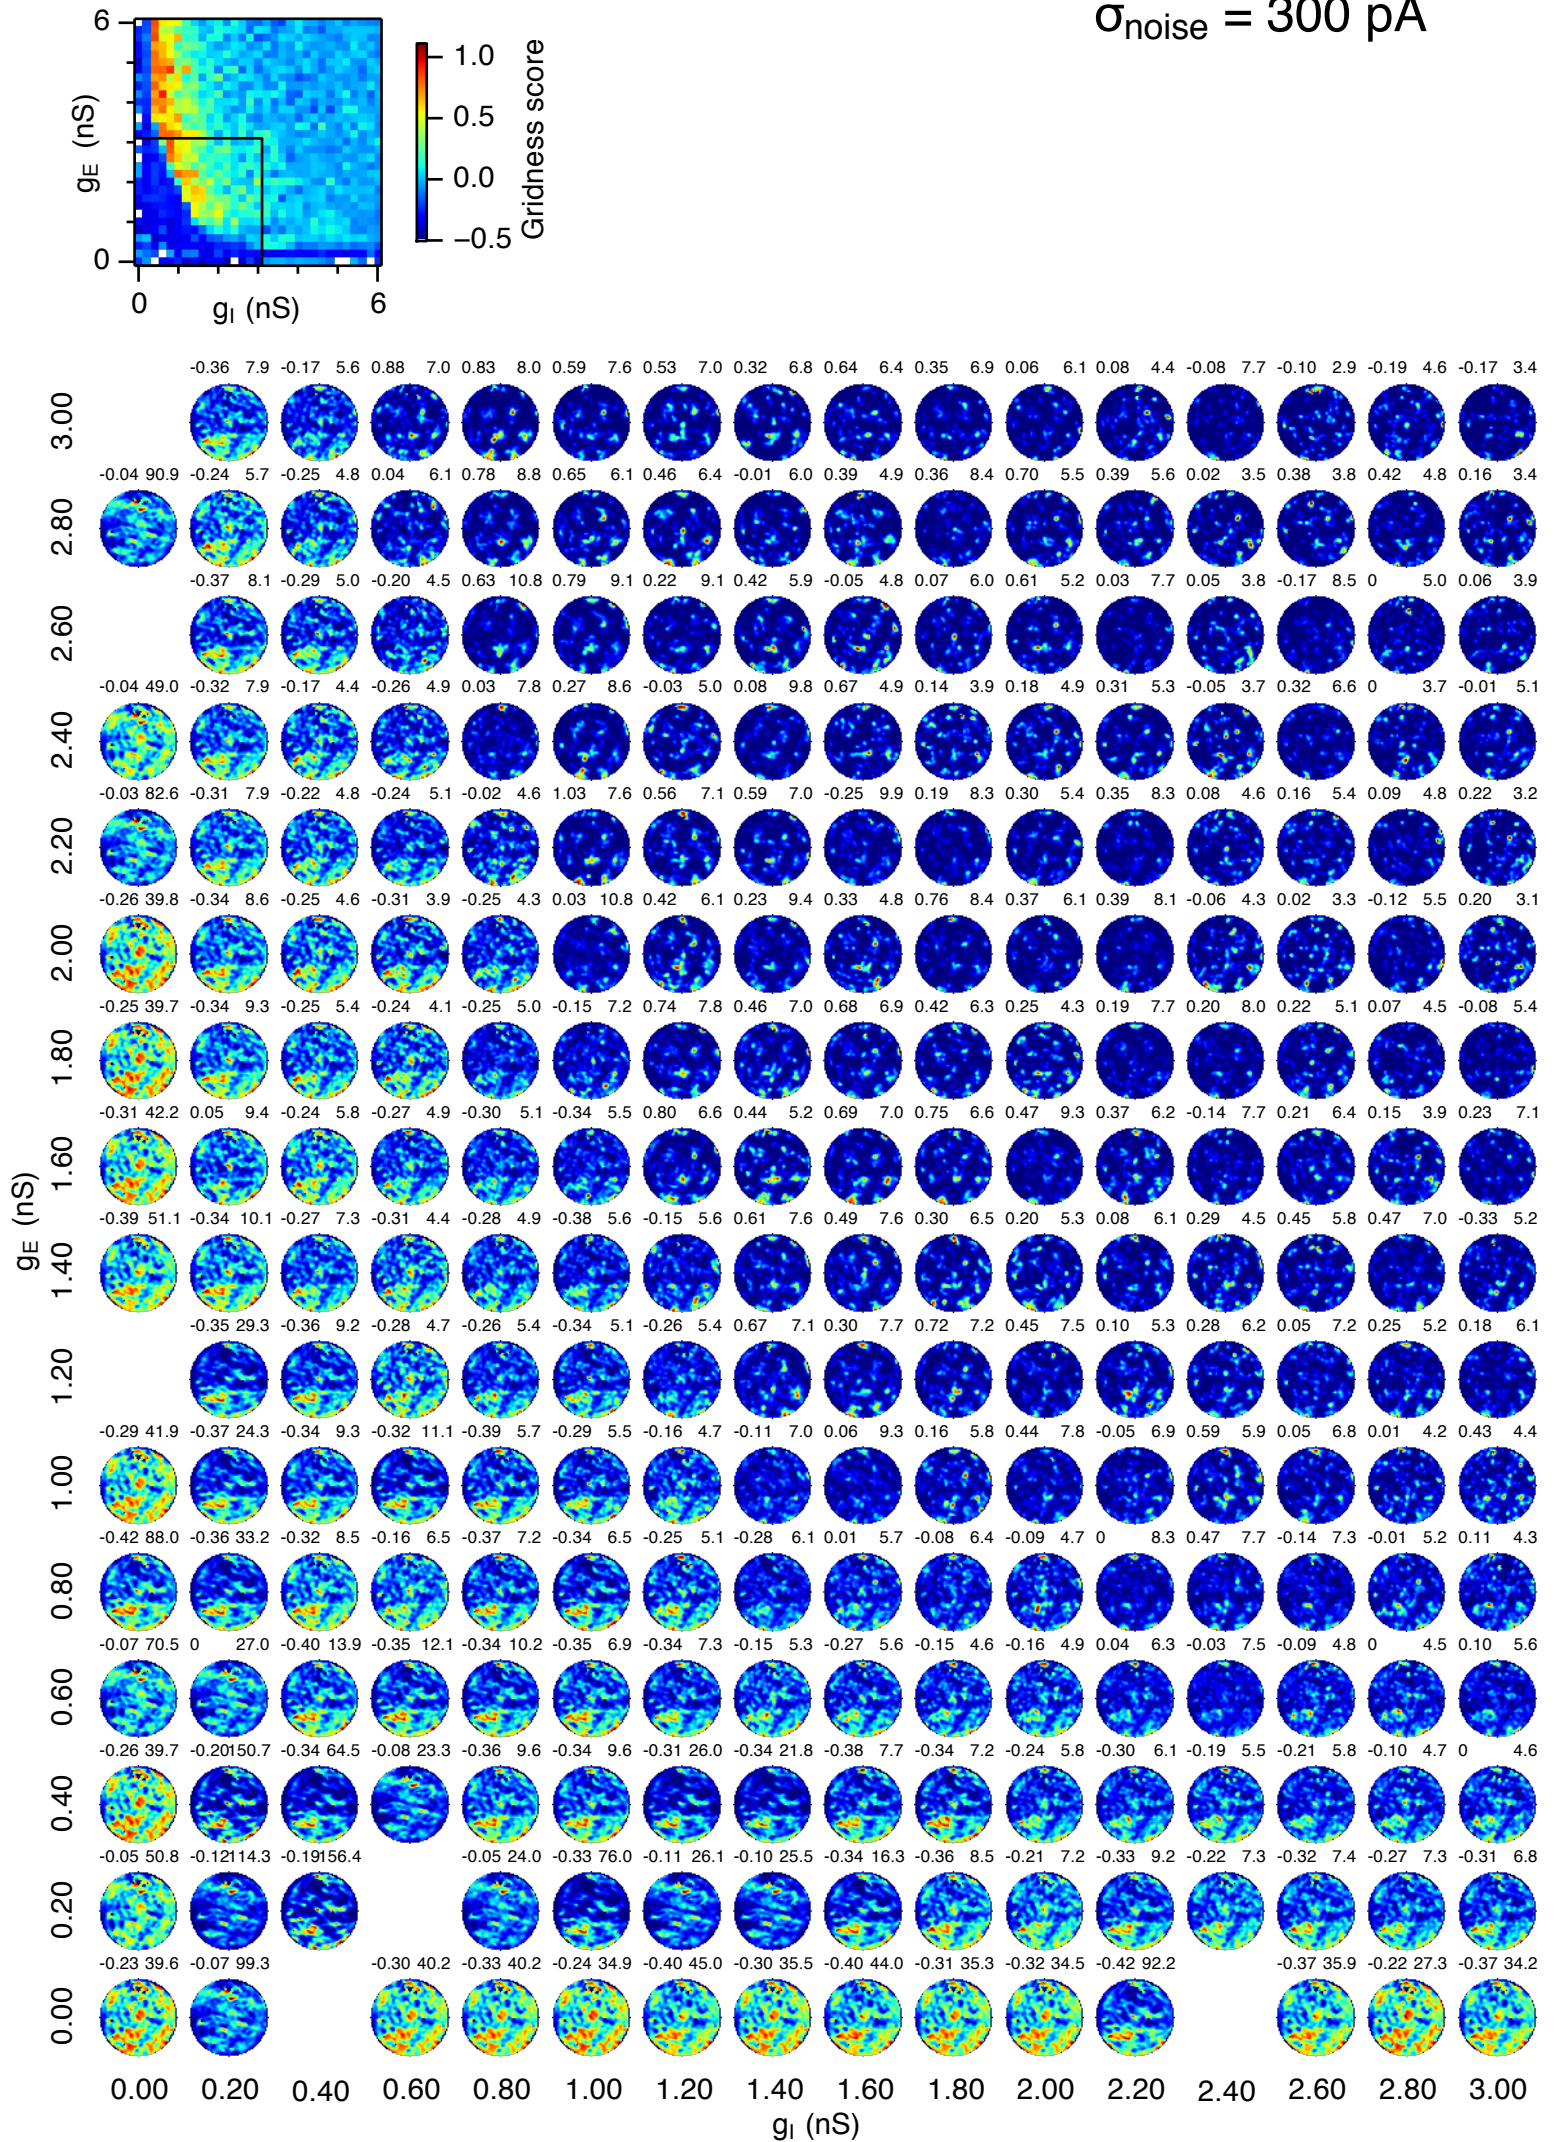



**J**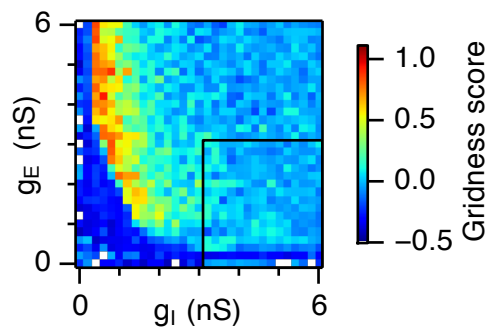 $\sigma_{\text{noise}} = 300 \text{ pA}$ 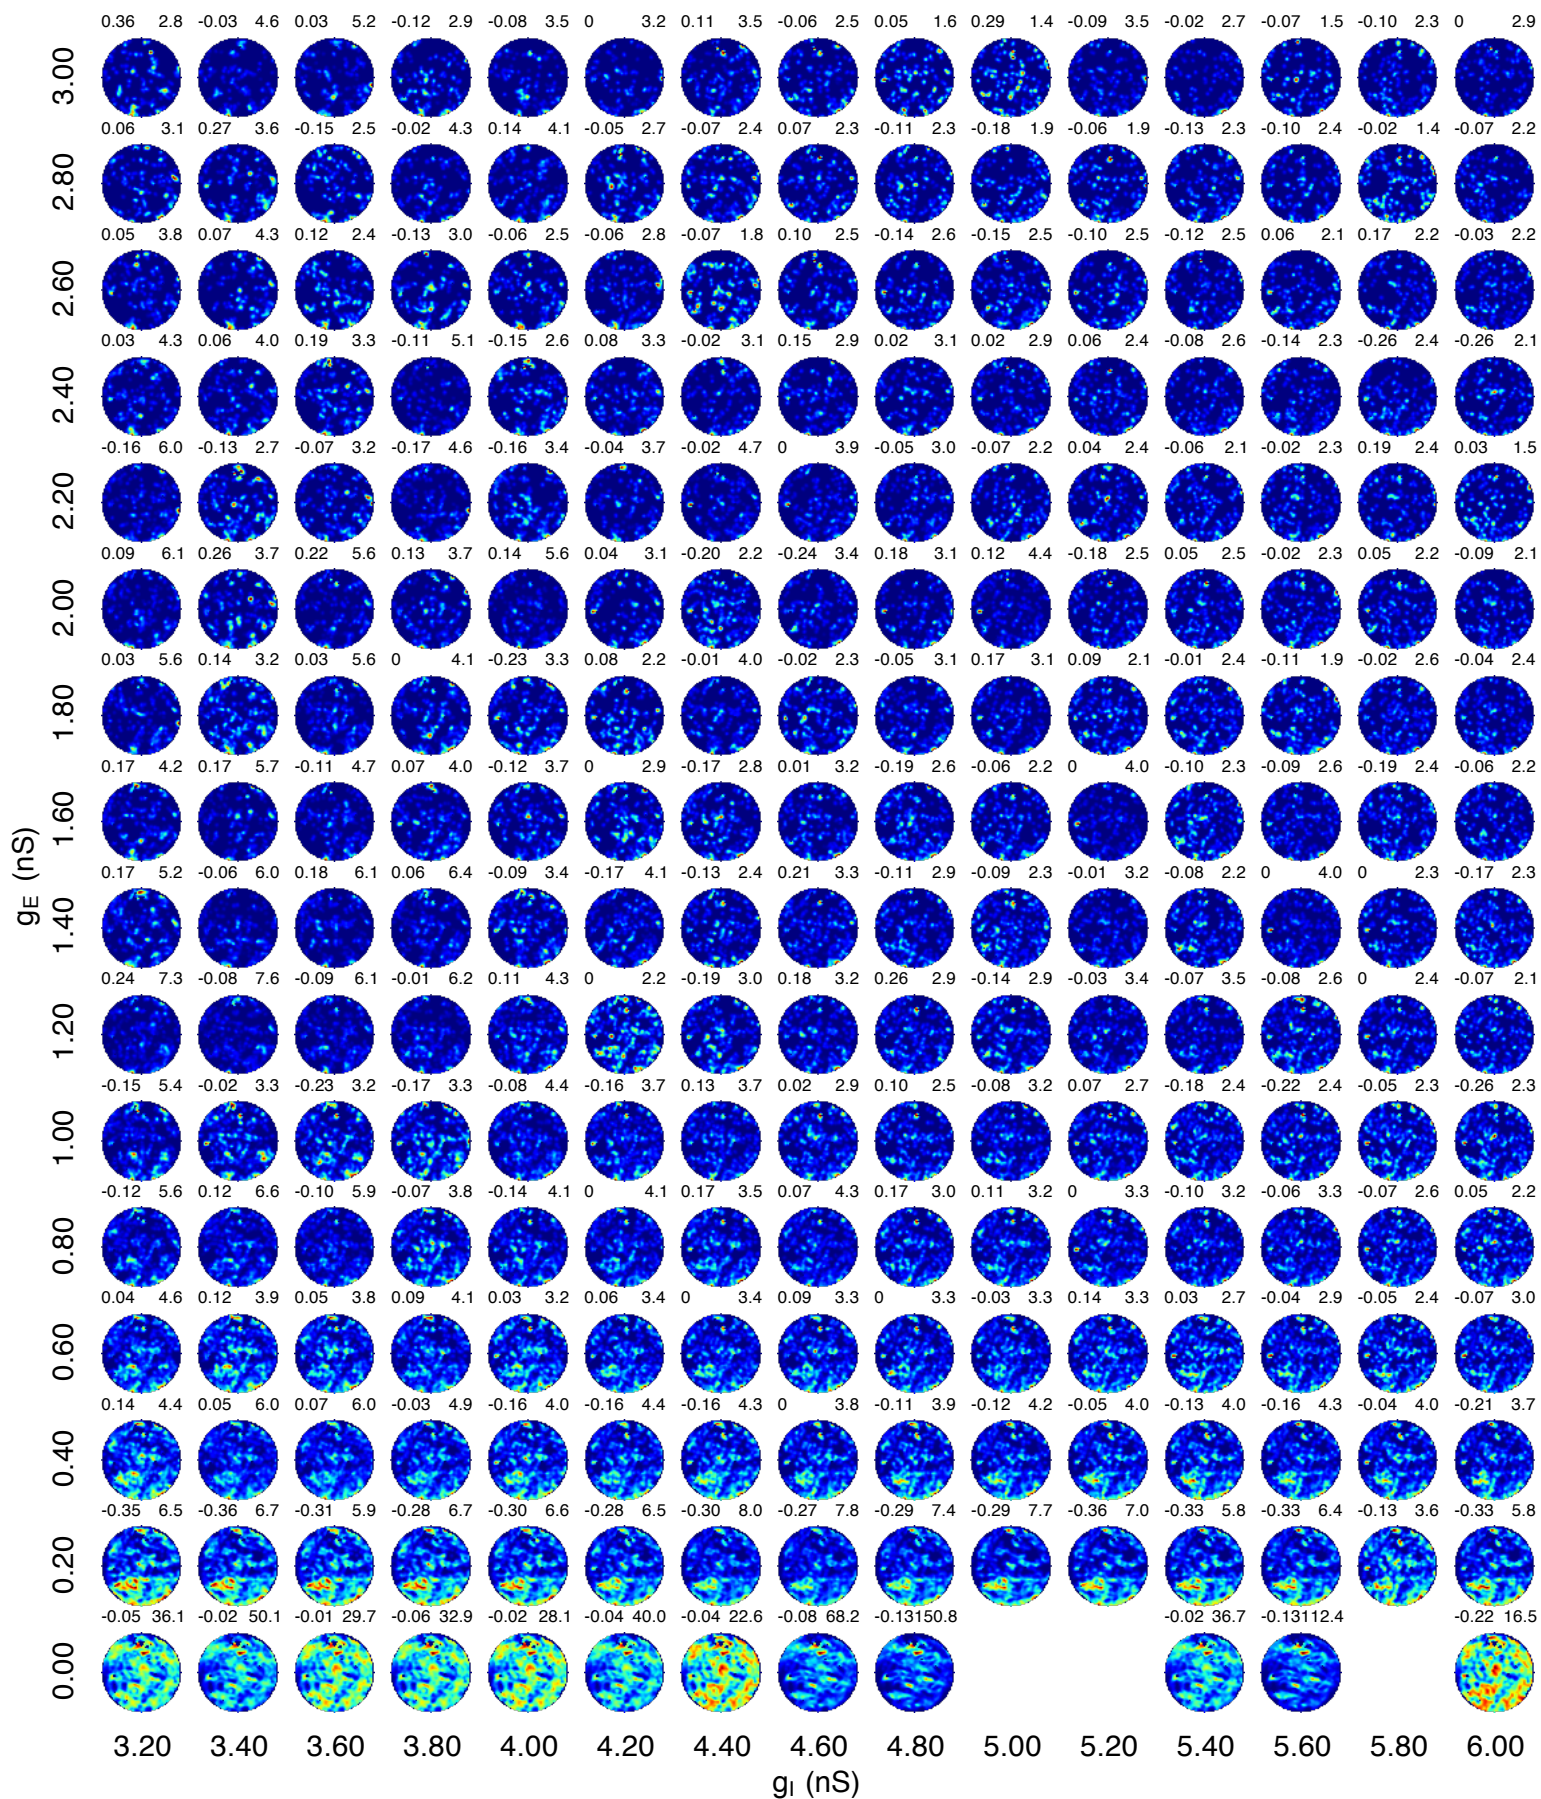



**K** $\sigma_{\text{noise}} = 300 \text{ pA}$ 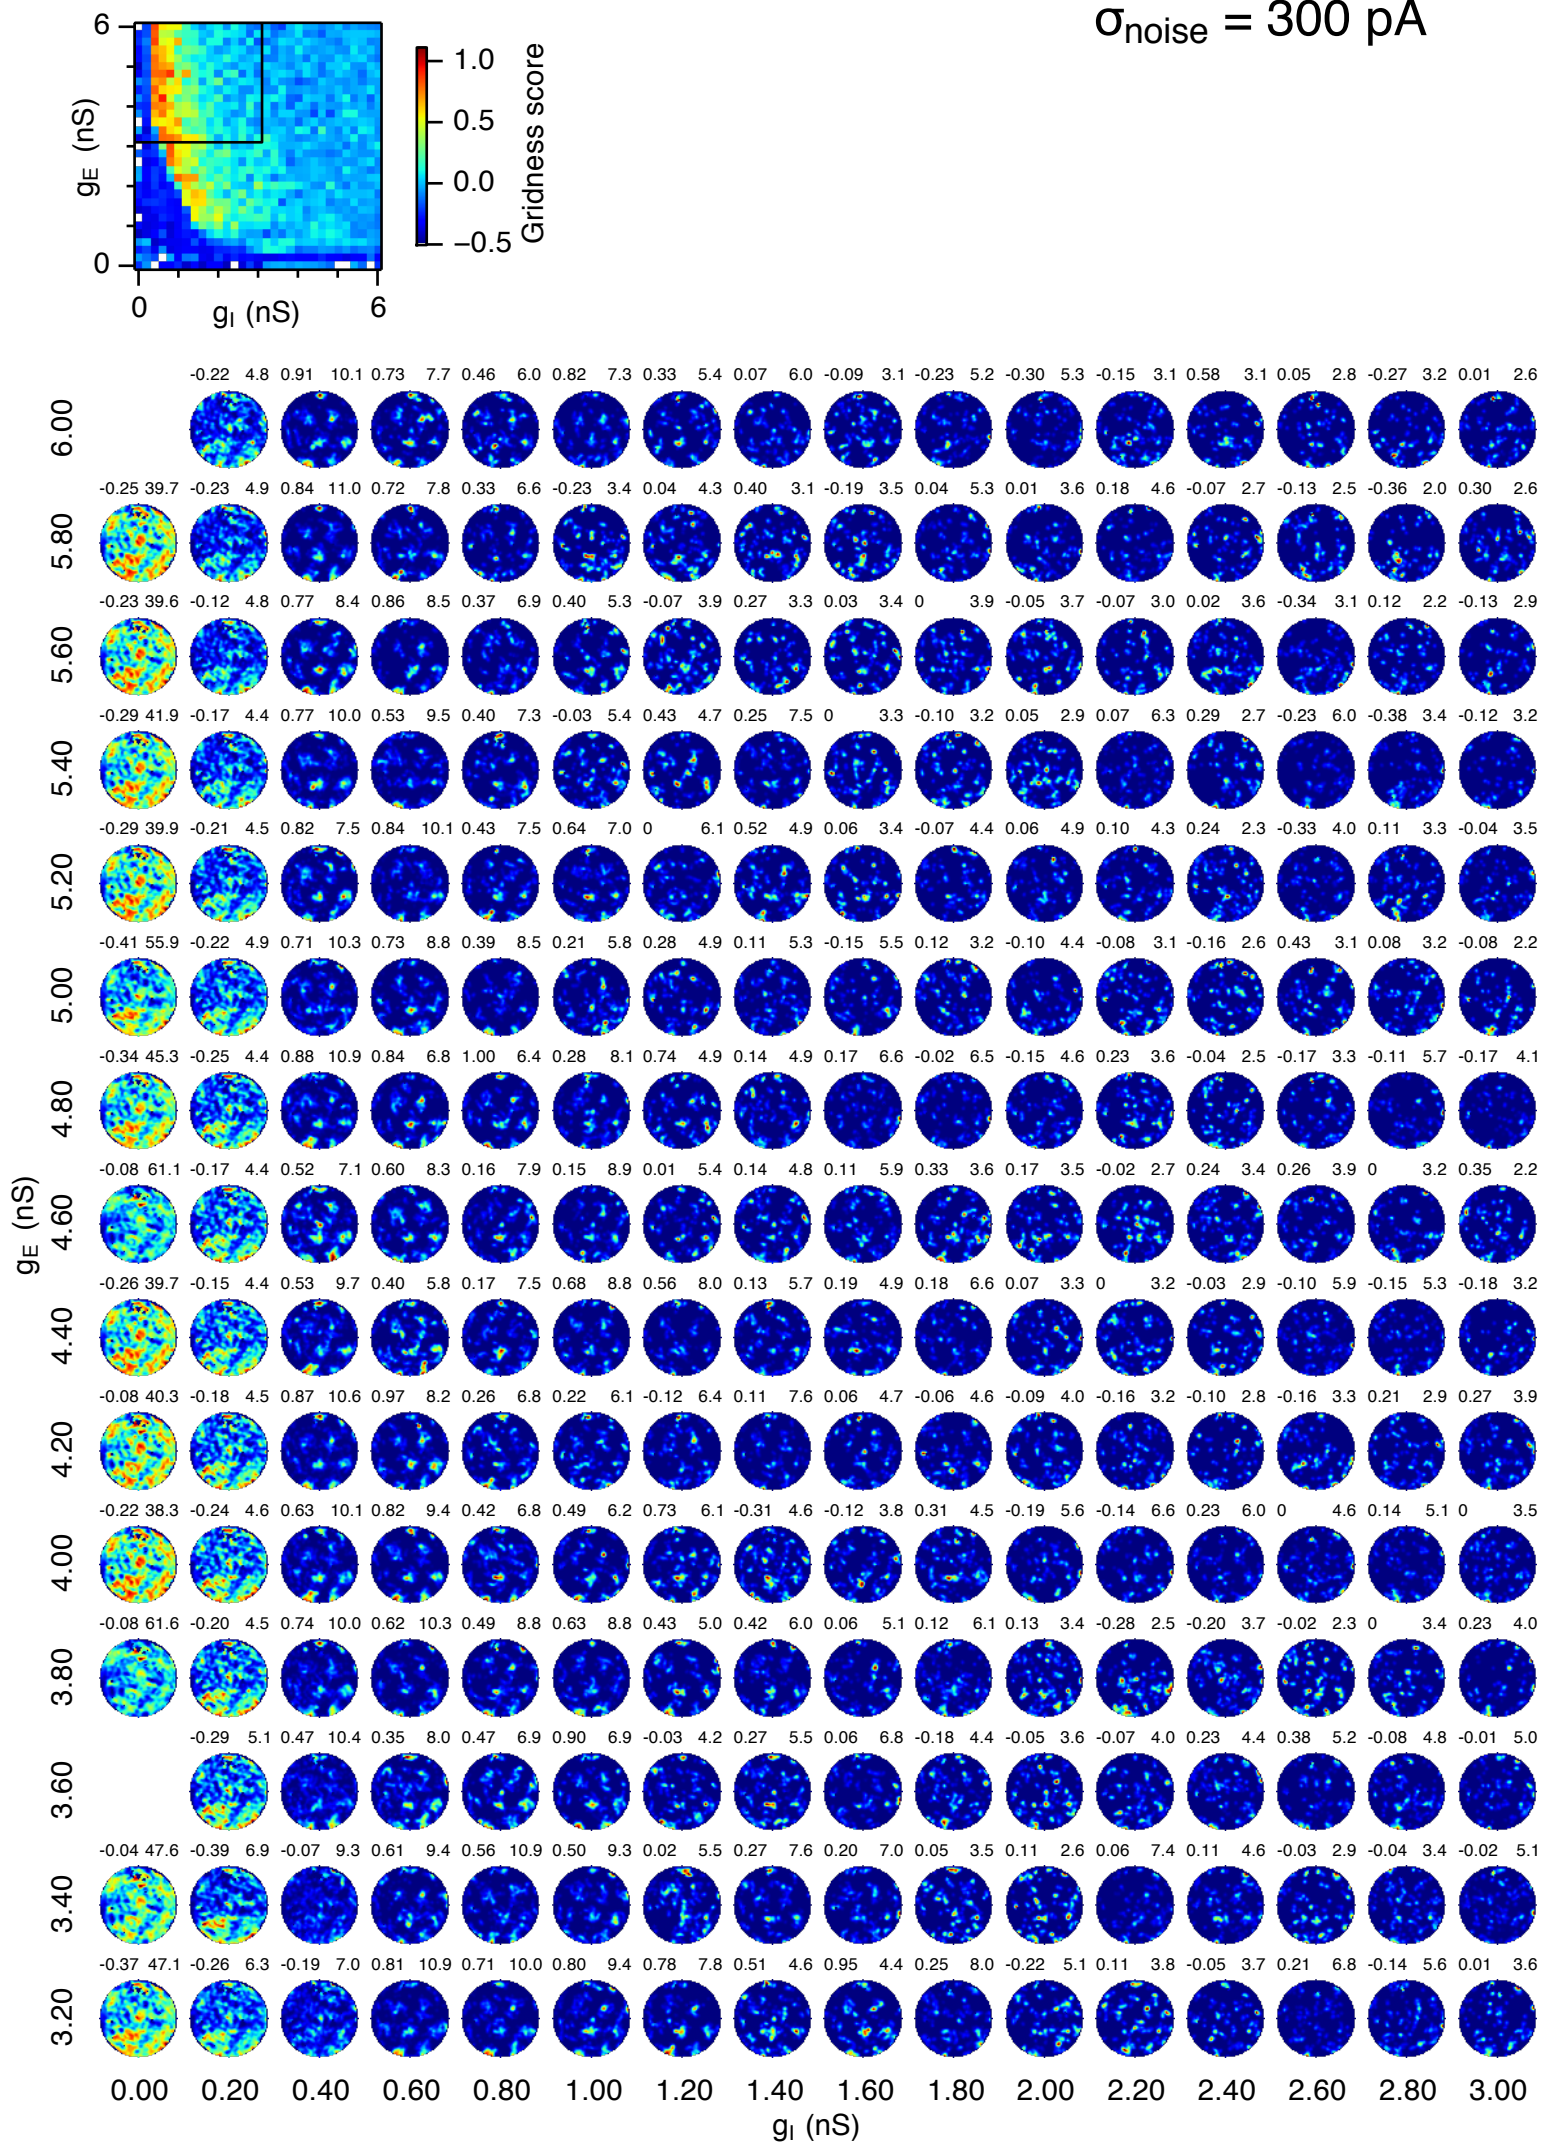



L

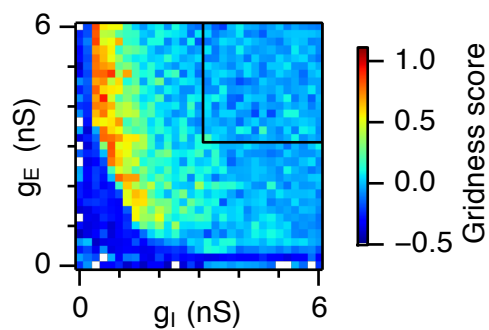
 $\sigma_{\text{noise}} = 300 \text{ pA}$ 
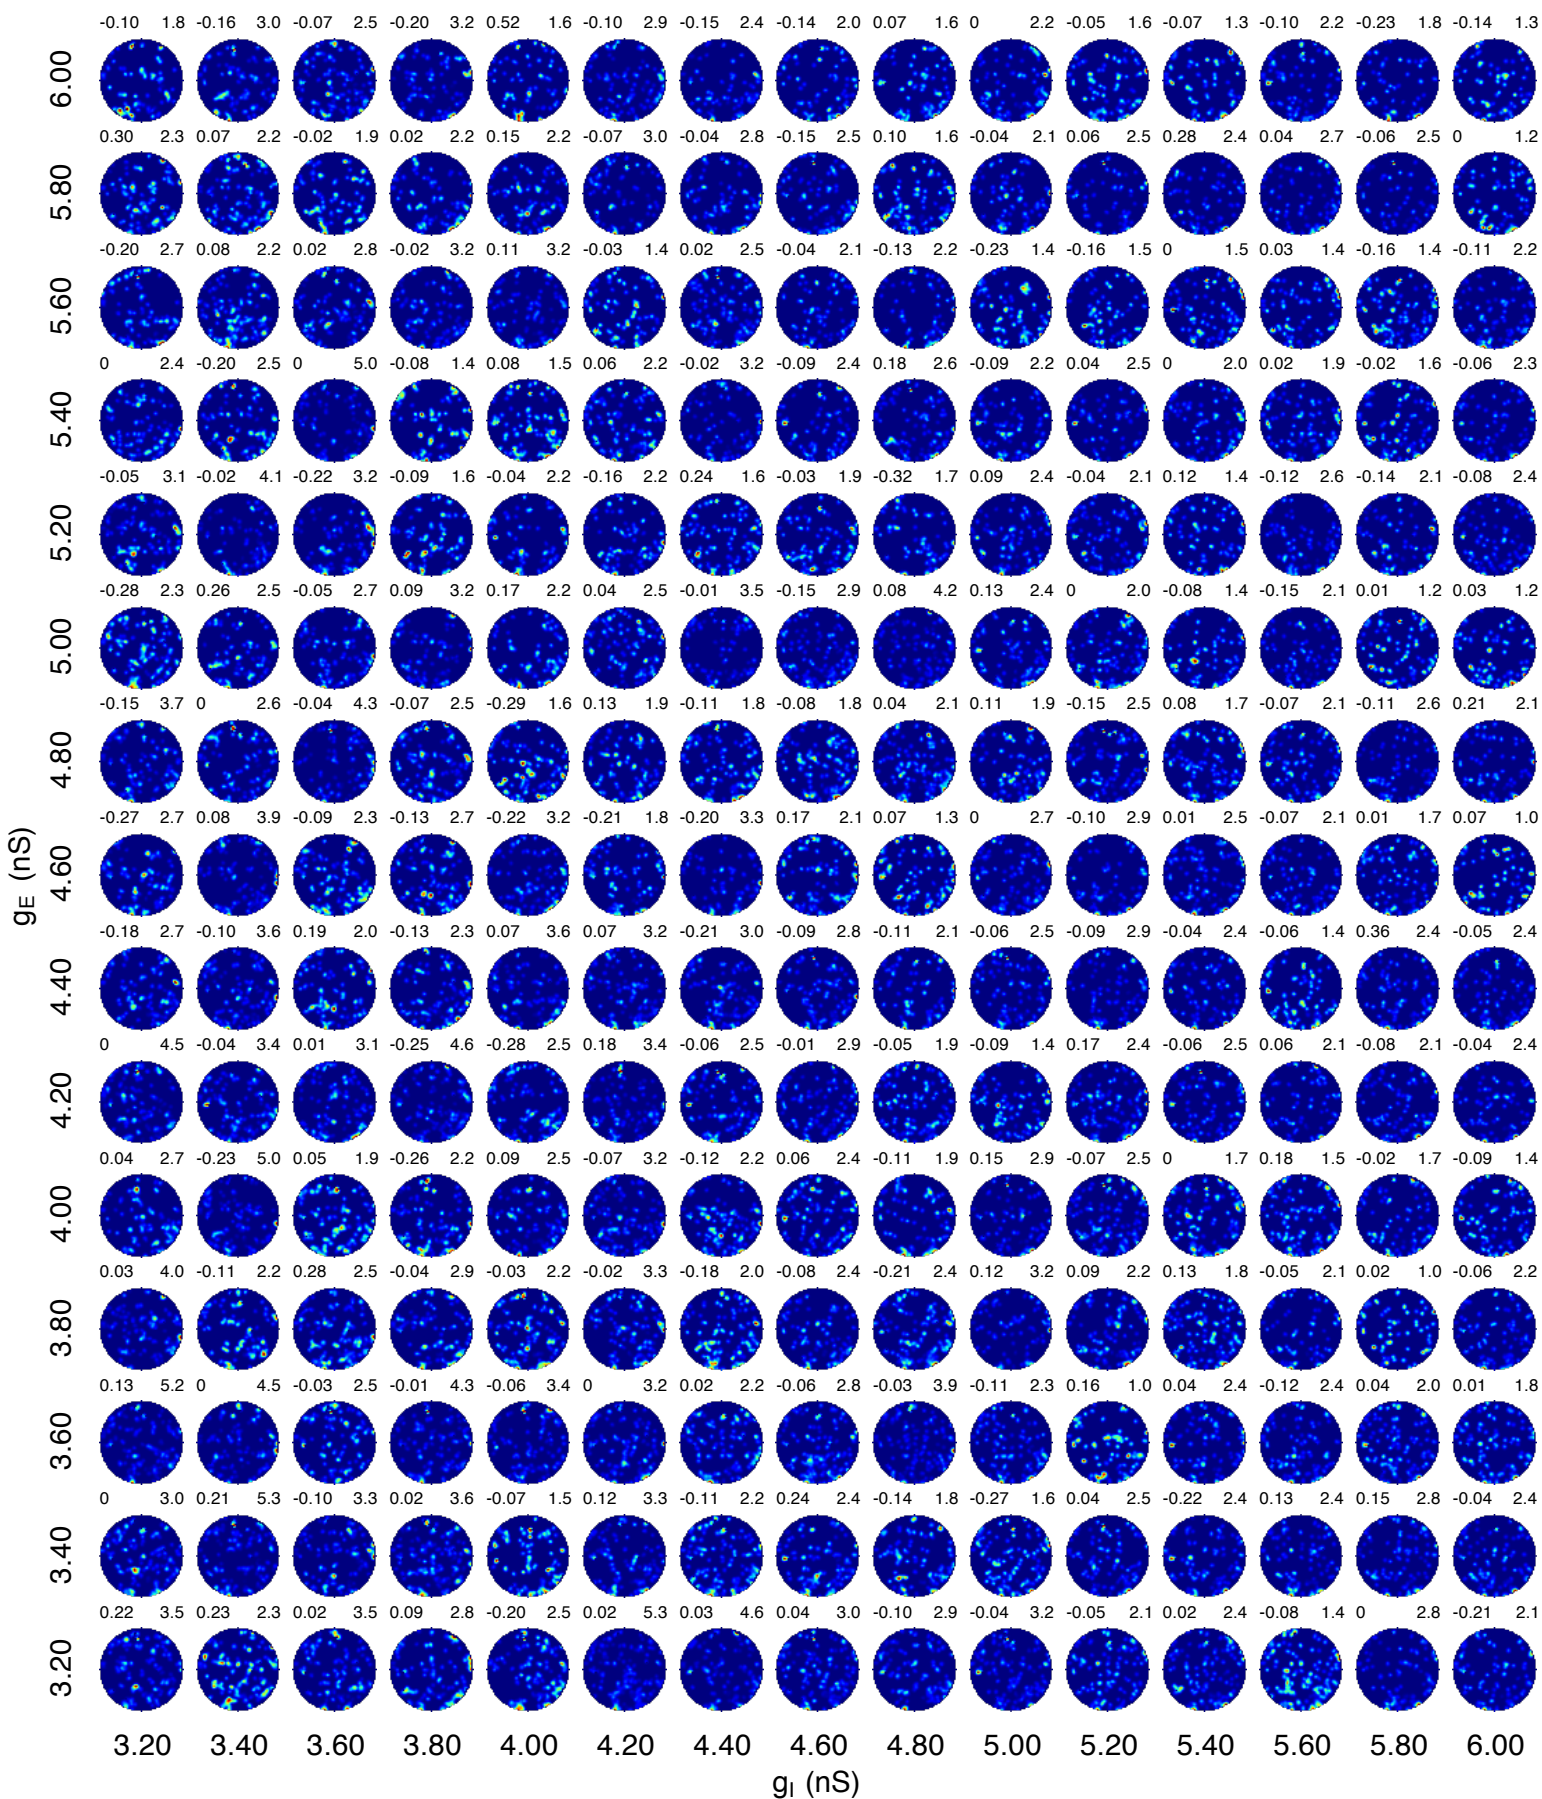

Supplement: supp [file elife-06444-supp-v1.zip]
