# Supplementary figures and images for: Noise promotes independent control of gamma oscillations and grid firing within recurrent attractor networks
Source: eLife journal article supplement (doi:10.7554/elife.06444), 2015-07-06

**A**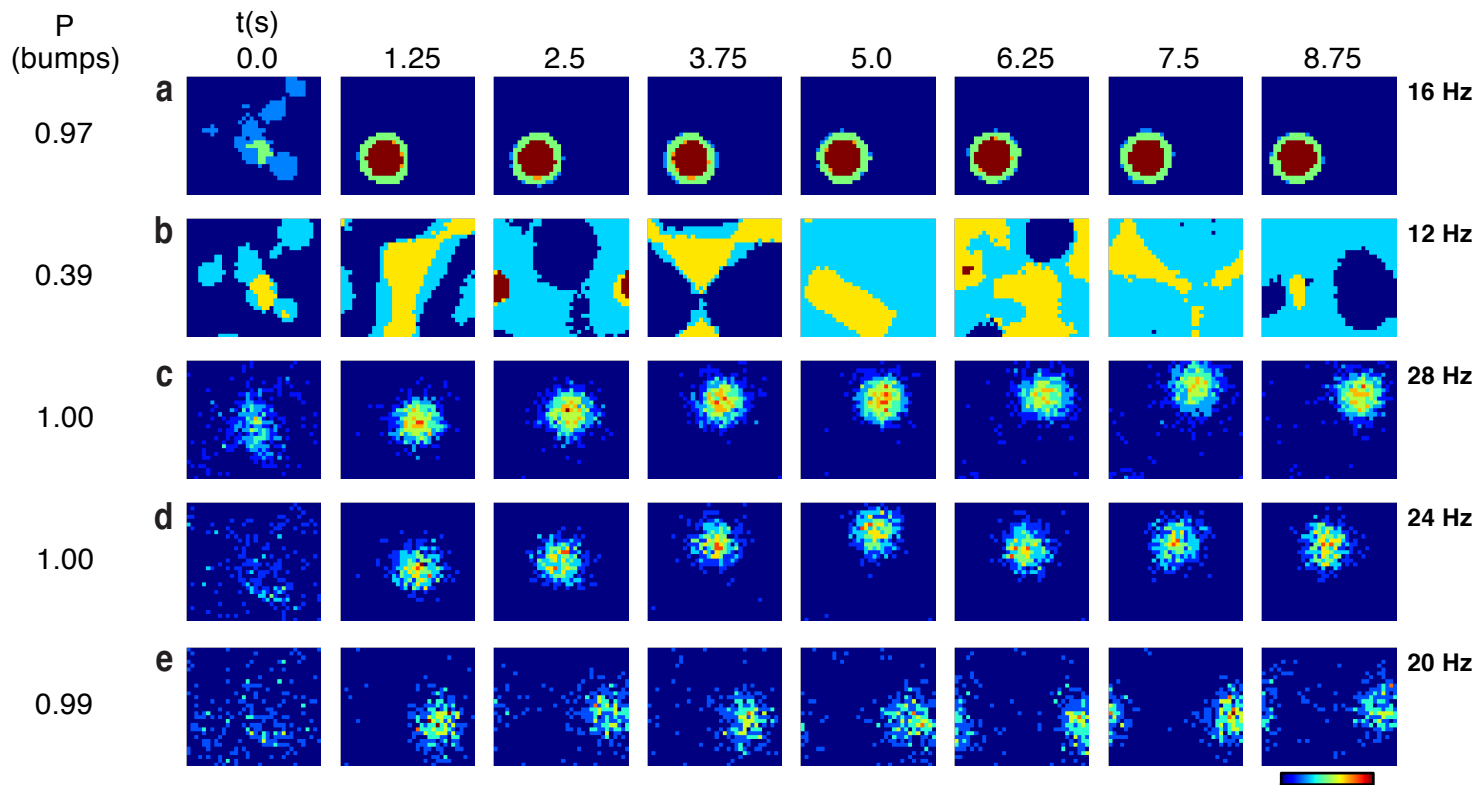**B**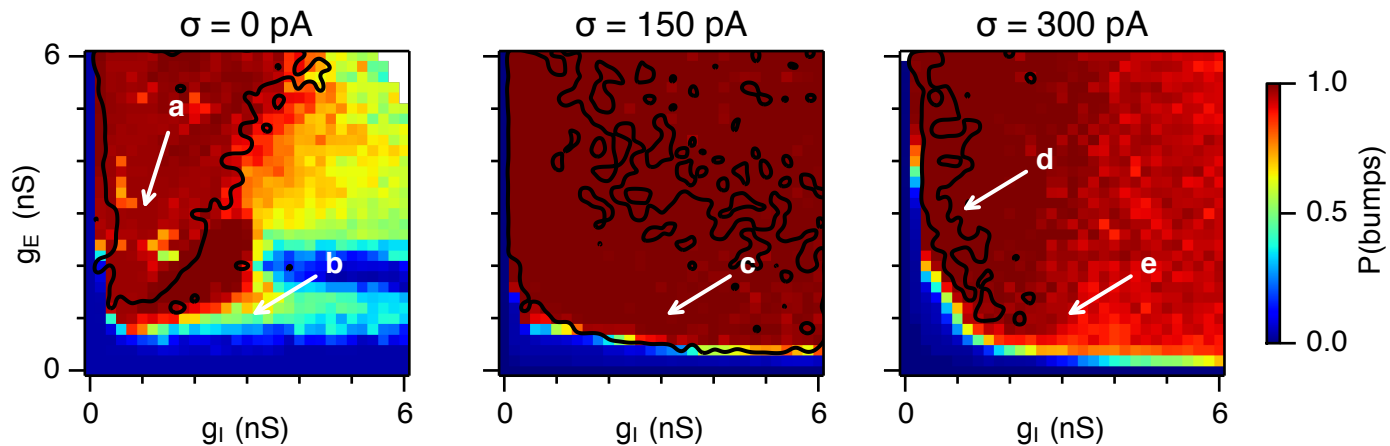

Supplement: supp [file elife-06444-supp-v1.zip]

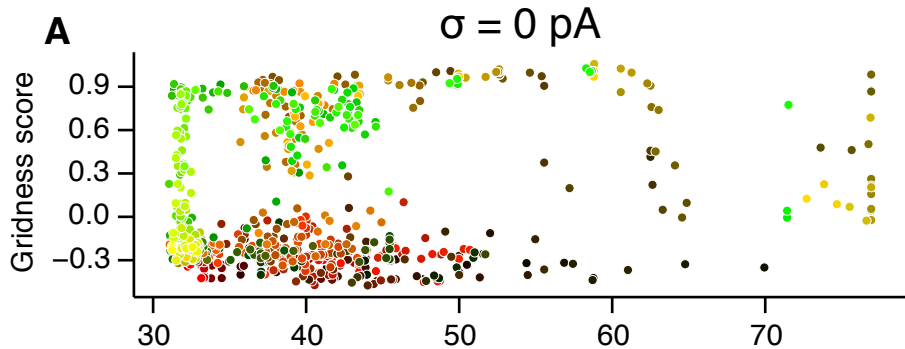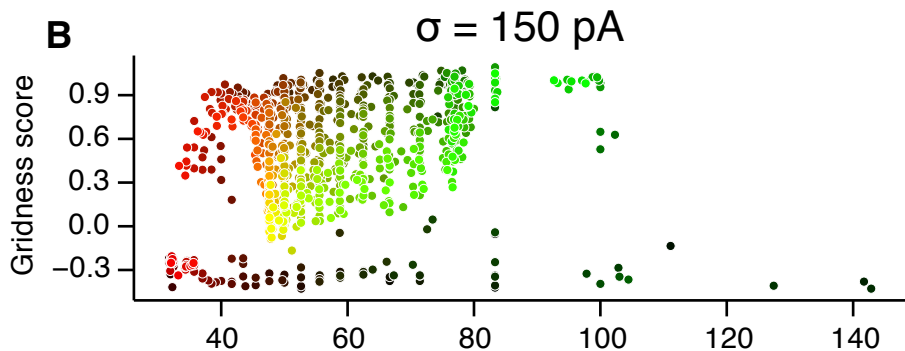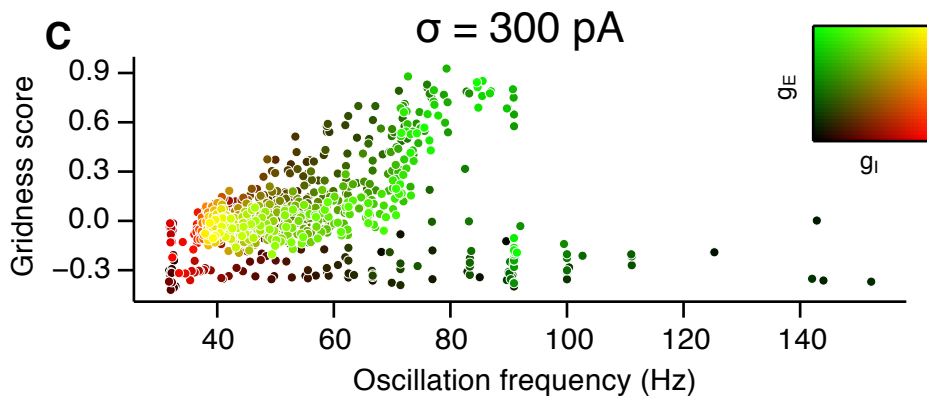

Supplement: supp [file elife-06444-supp-v1.zip]

**A**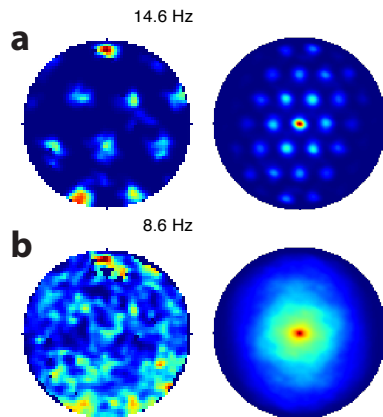**B**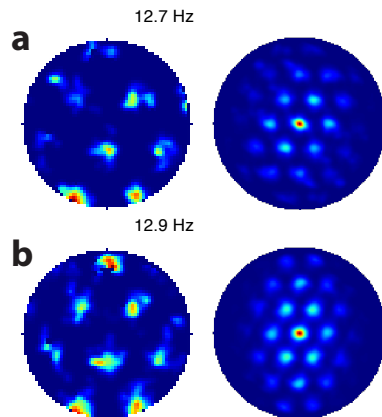**C**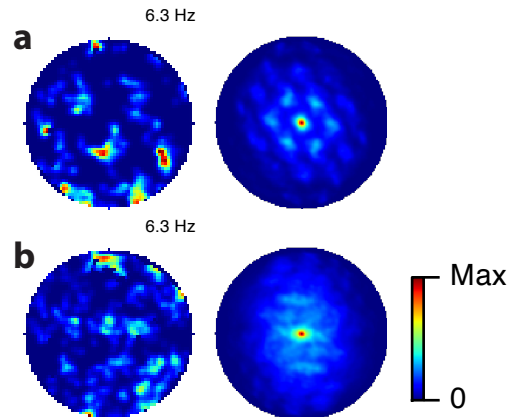**D**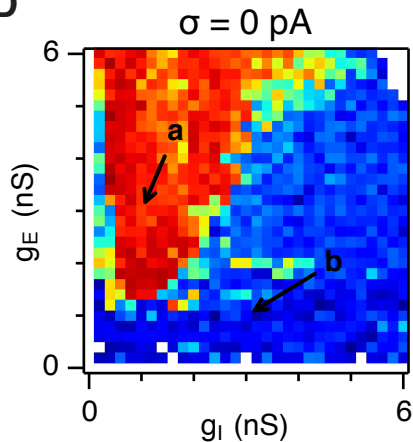**E**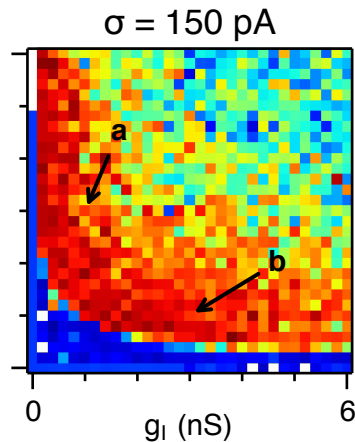**F**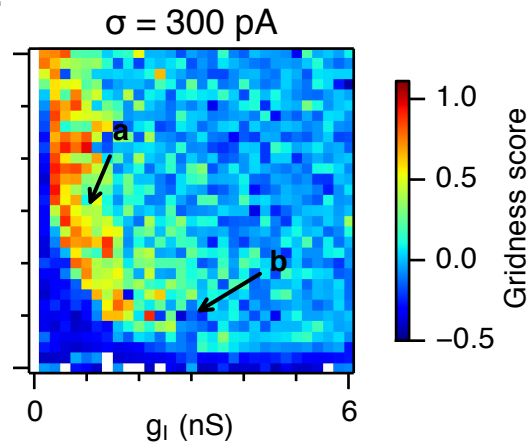

Supplement: supp [file elife-06444-supp-v1.zip]

**A** $\sigma = 0$  pA

20.4 Hz

**a**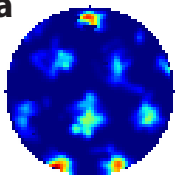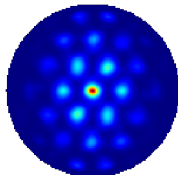

18.2 Hz

**b**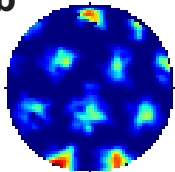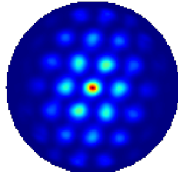**B** $\sigma = 150$  pA

18.6 Hz

**a**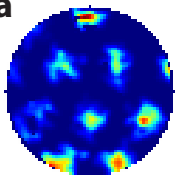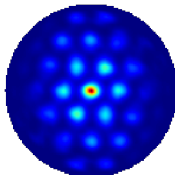

18.0 Hz

**b**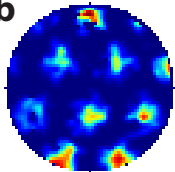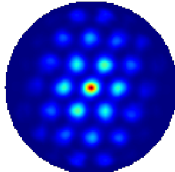**C** $\sigma = 300$  pA

20.5 Hz

**a**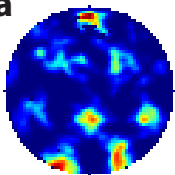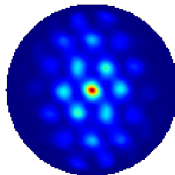

20.3 Hz

**b**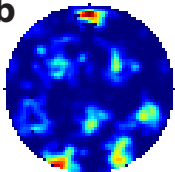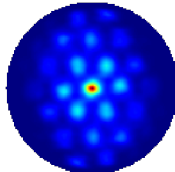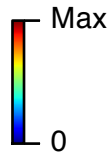

Supplement: supp [file elife-06444-supp-v1.zip]

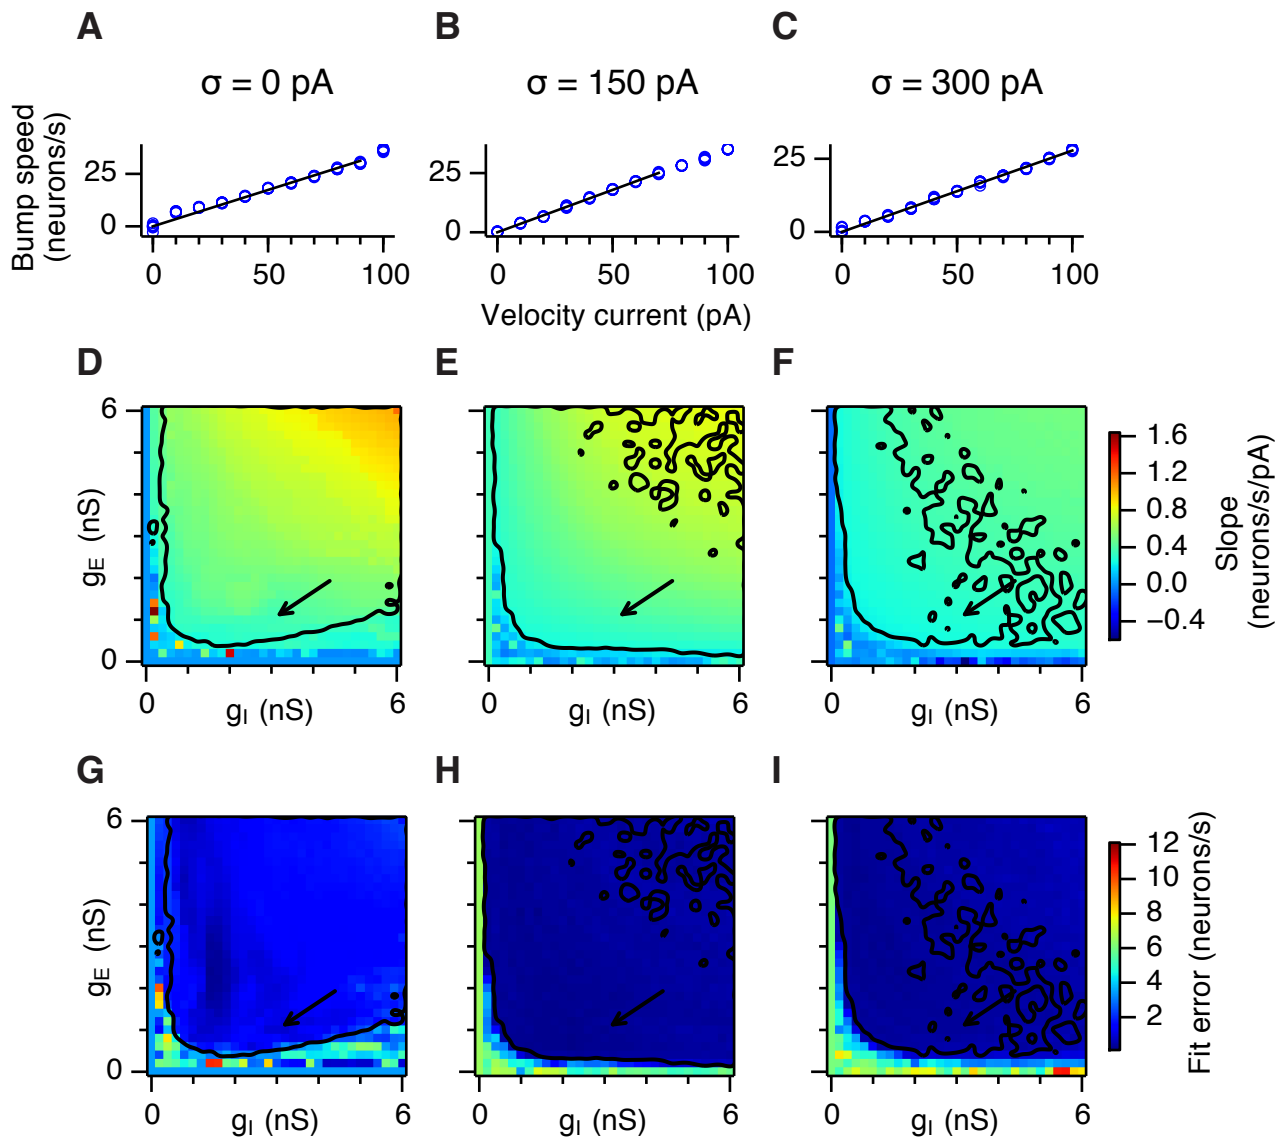

Supplement: supp [file elife-06444-supp-v1.zip]

**A**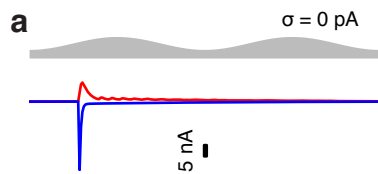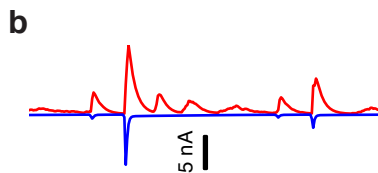**B**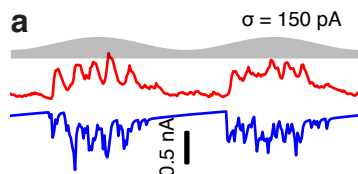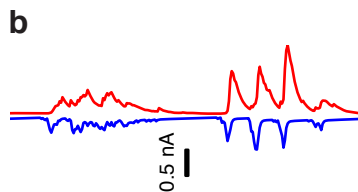**C**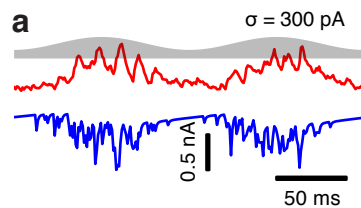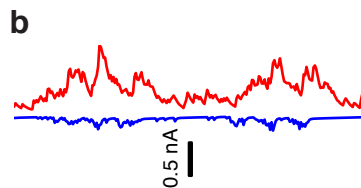**D**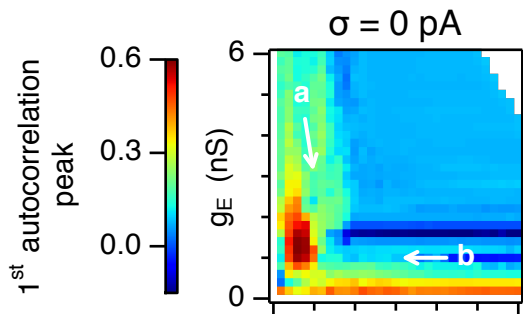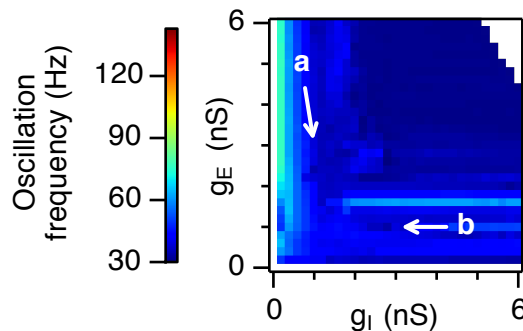**E**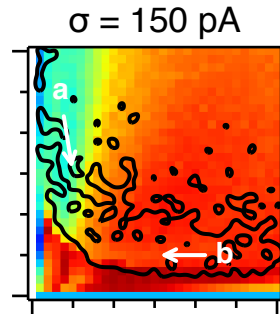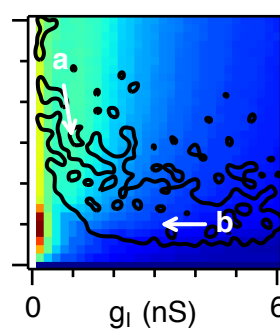**F**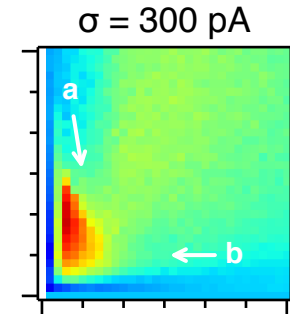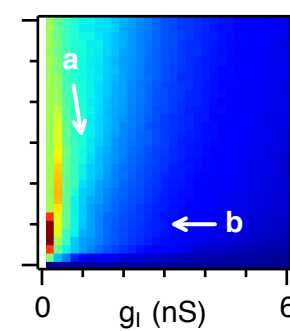

Supplement: supp [file elife-06444-supp-v1.zip]

**A**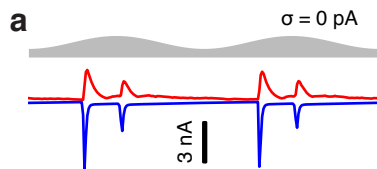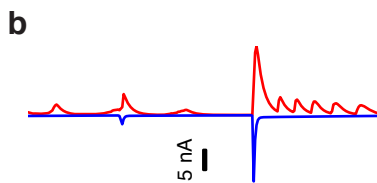**B**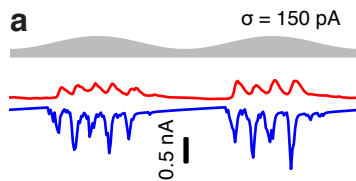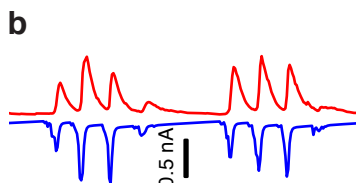**C**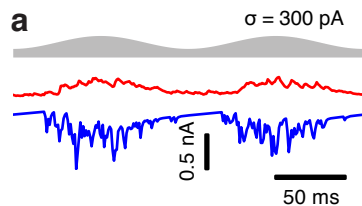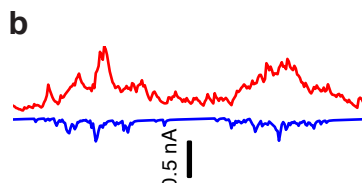**D**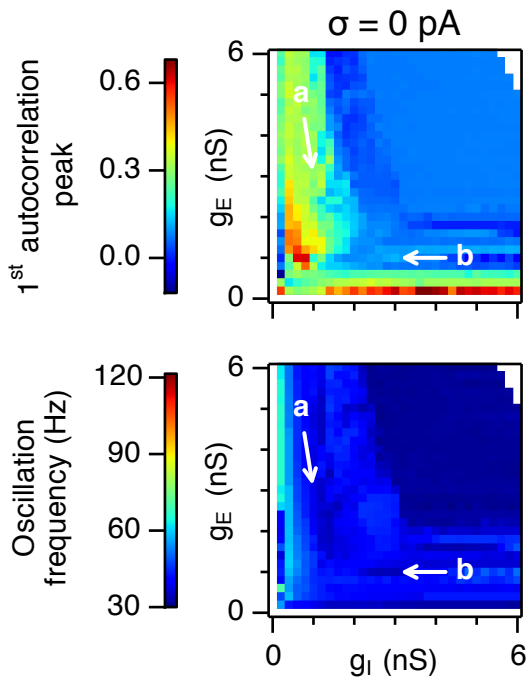**E**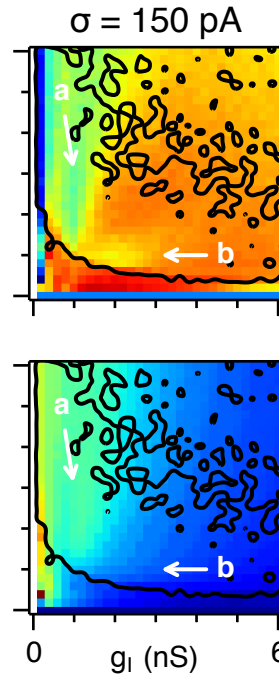**F**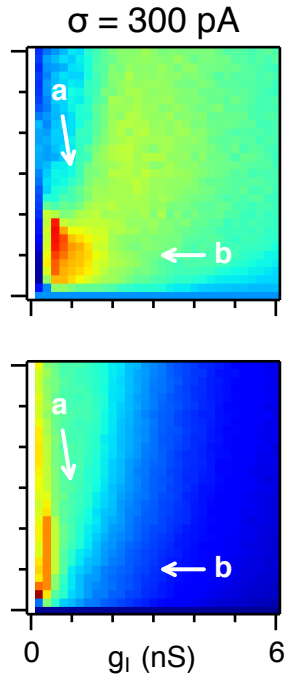

Supplement: supp [file elife-06444-supp-v1.zip]

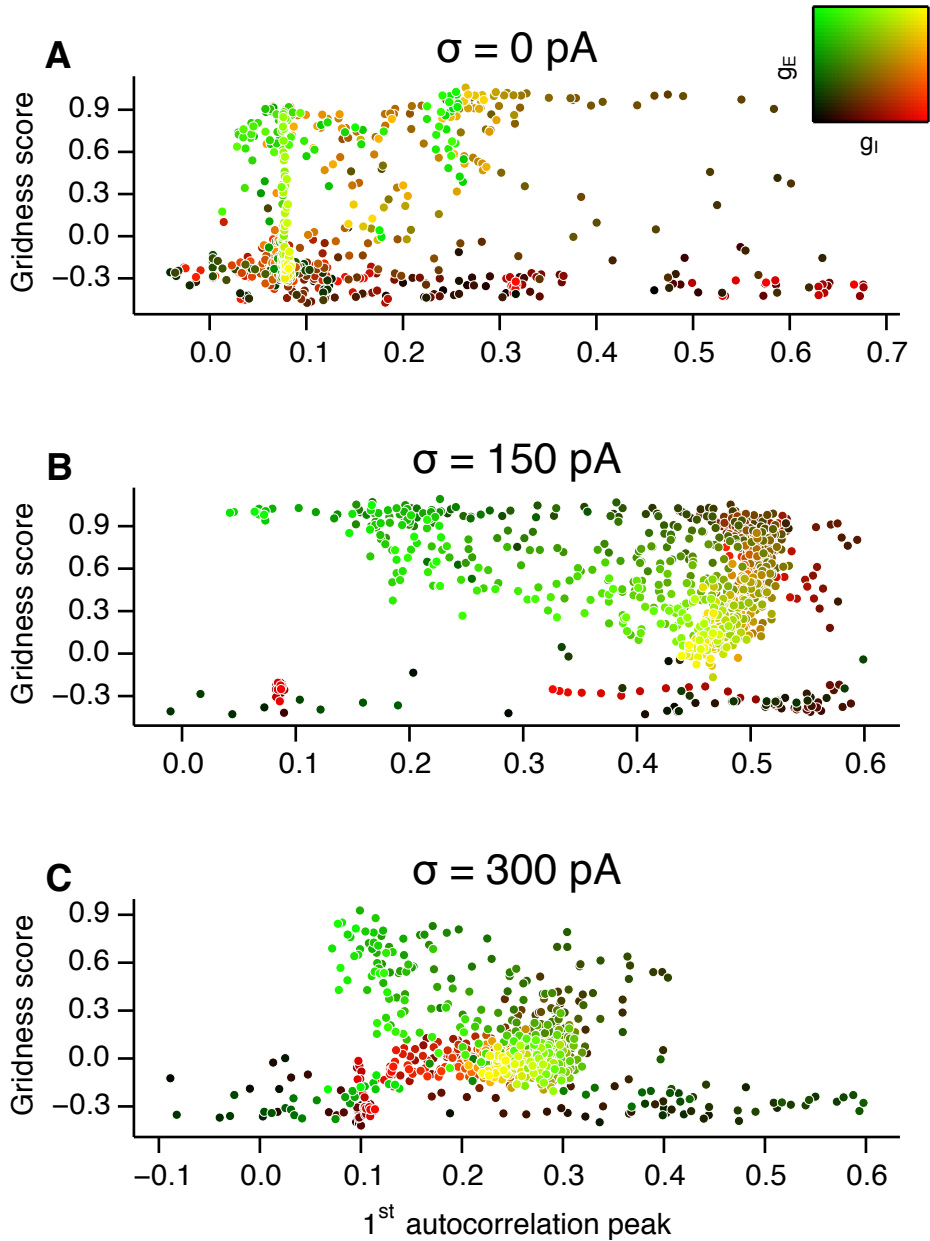

Supplement: supp [file elife-06444-supp-v1.zip]

**A**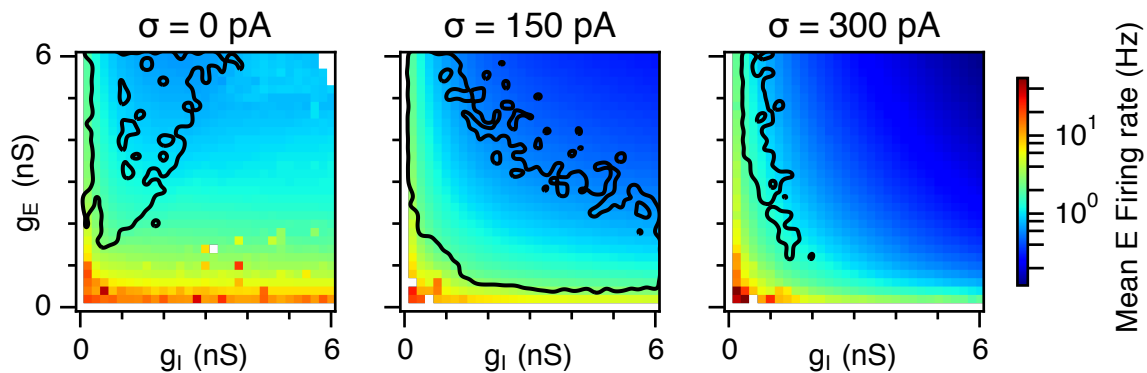**B**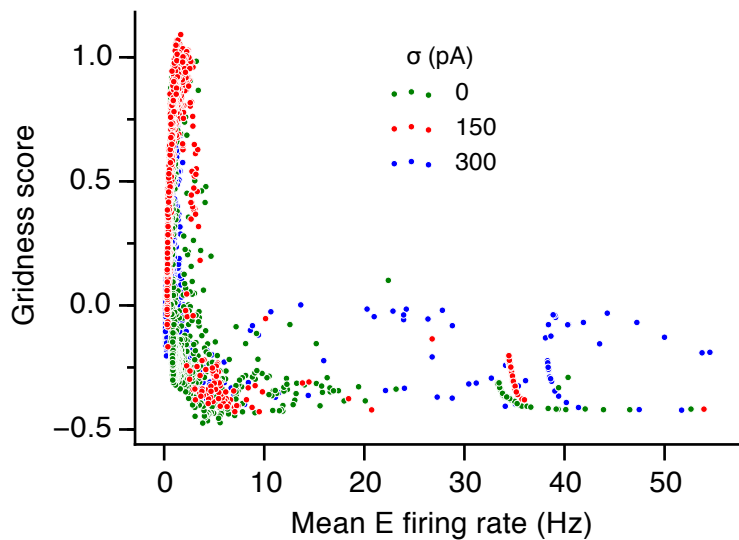

Supplement: supp [file elife-06444-supp-v1.zip]

**A**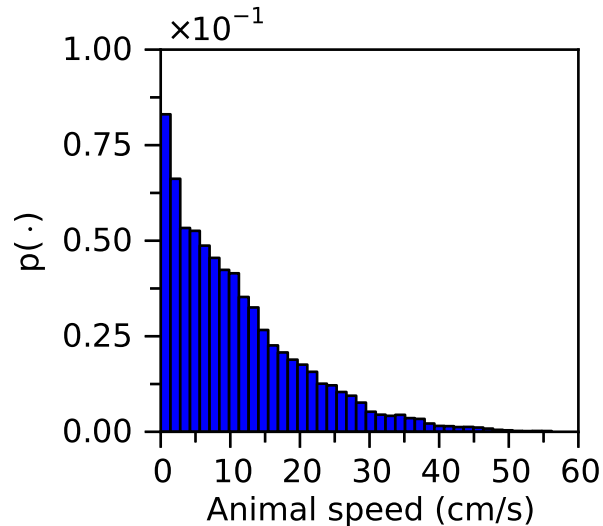**B**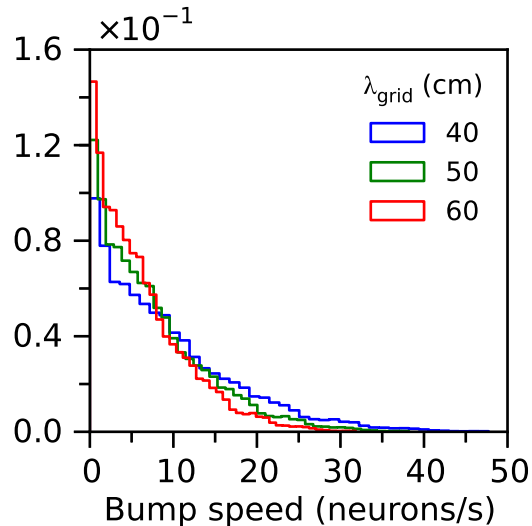

Supplement: supp [file elife-06444-supp-v1.zip]

**A**

Scaled connection weights

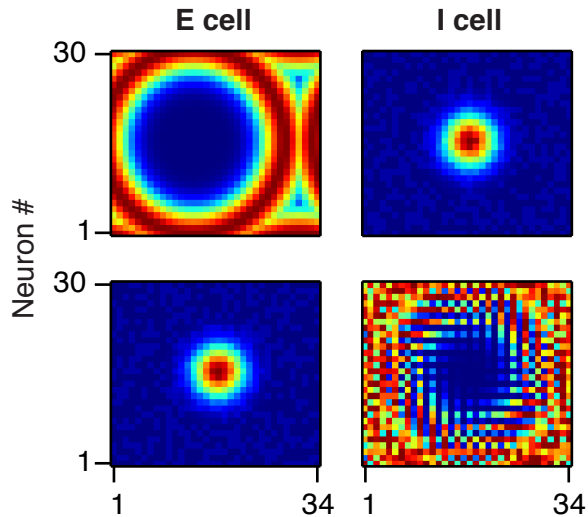**B**

Probabilistic connection weights

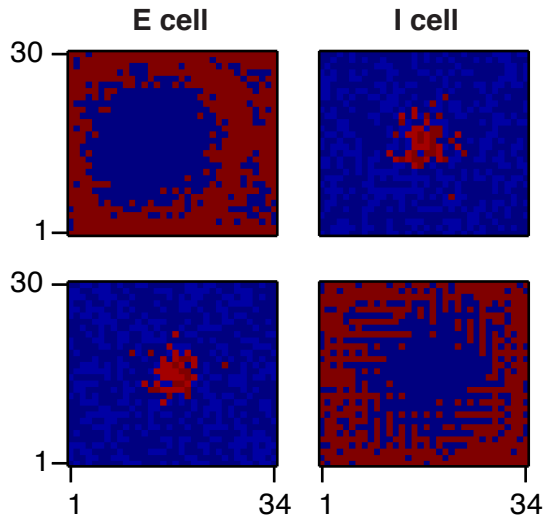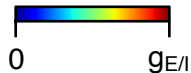

Supplement: supp [file elife-06444-supp-v1.zip]

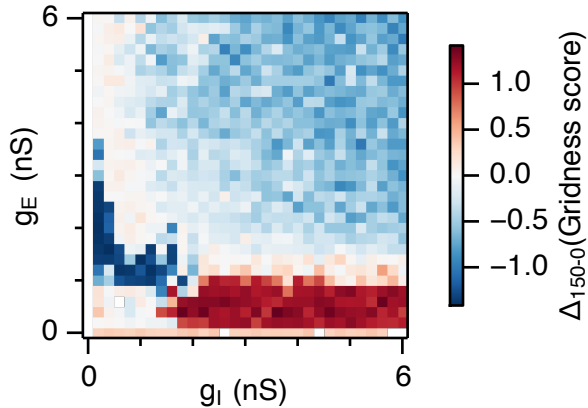

Supplement: supp [file elife-06444-supp-v1.zip]

**A**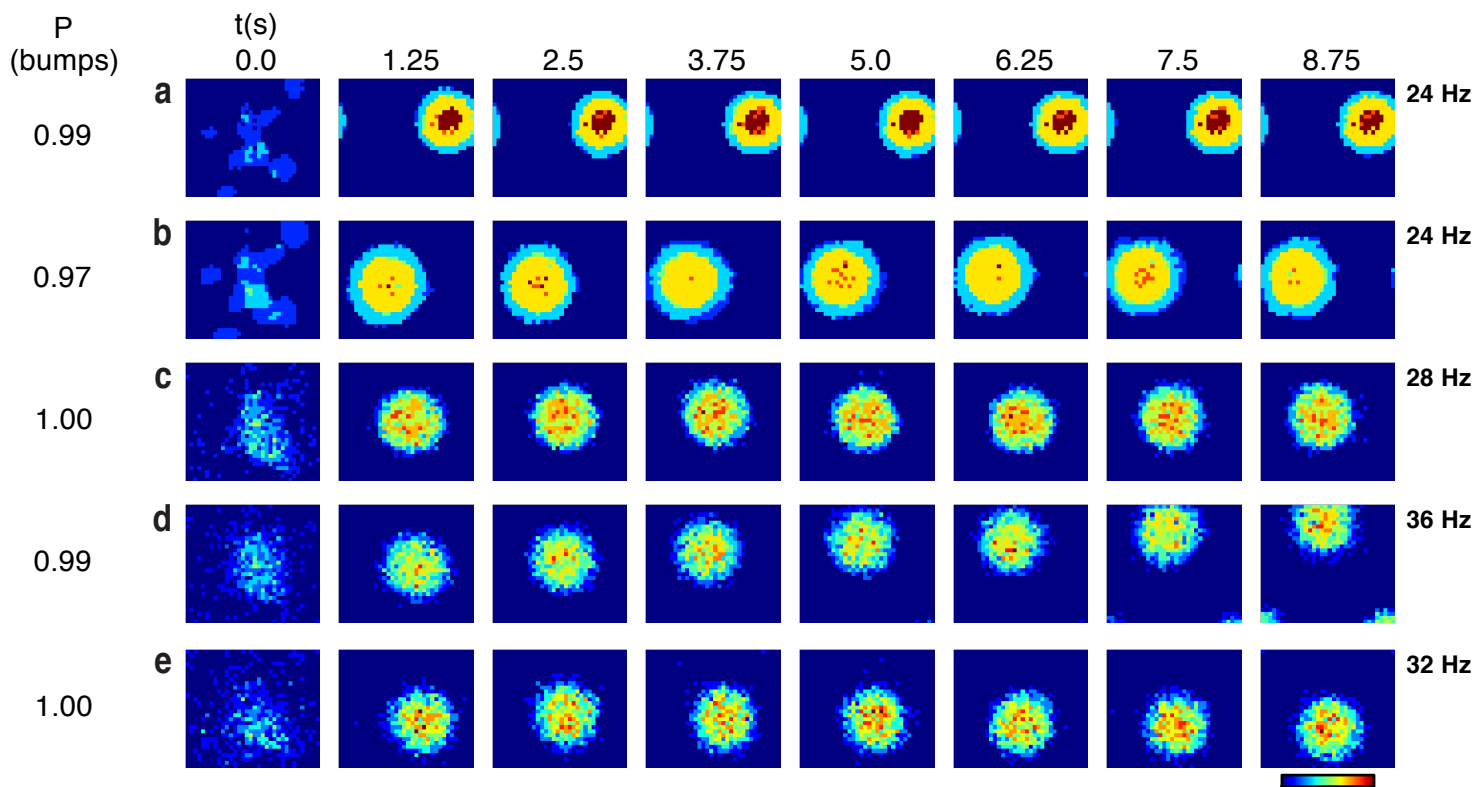**B**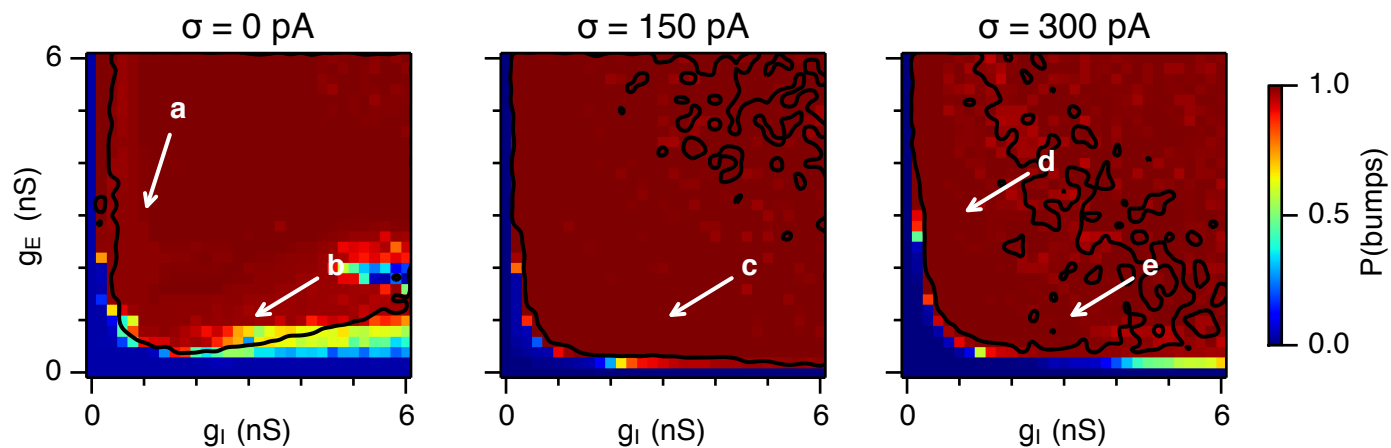

Supplement: supp [file elife-06444-supp-v1.zip]

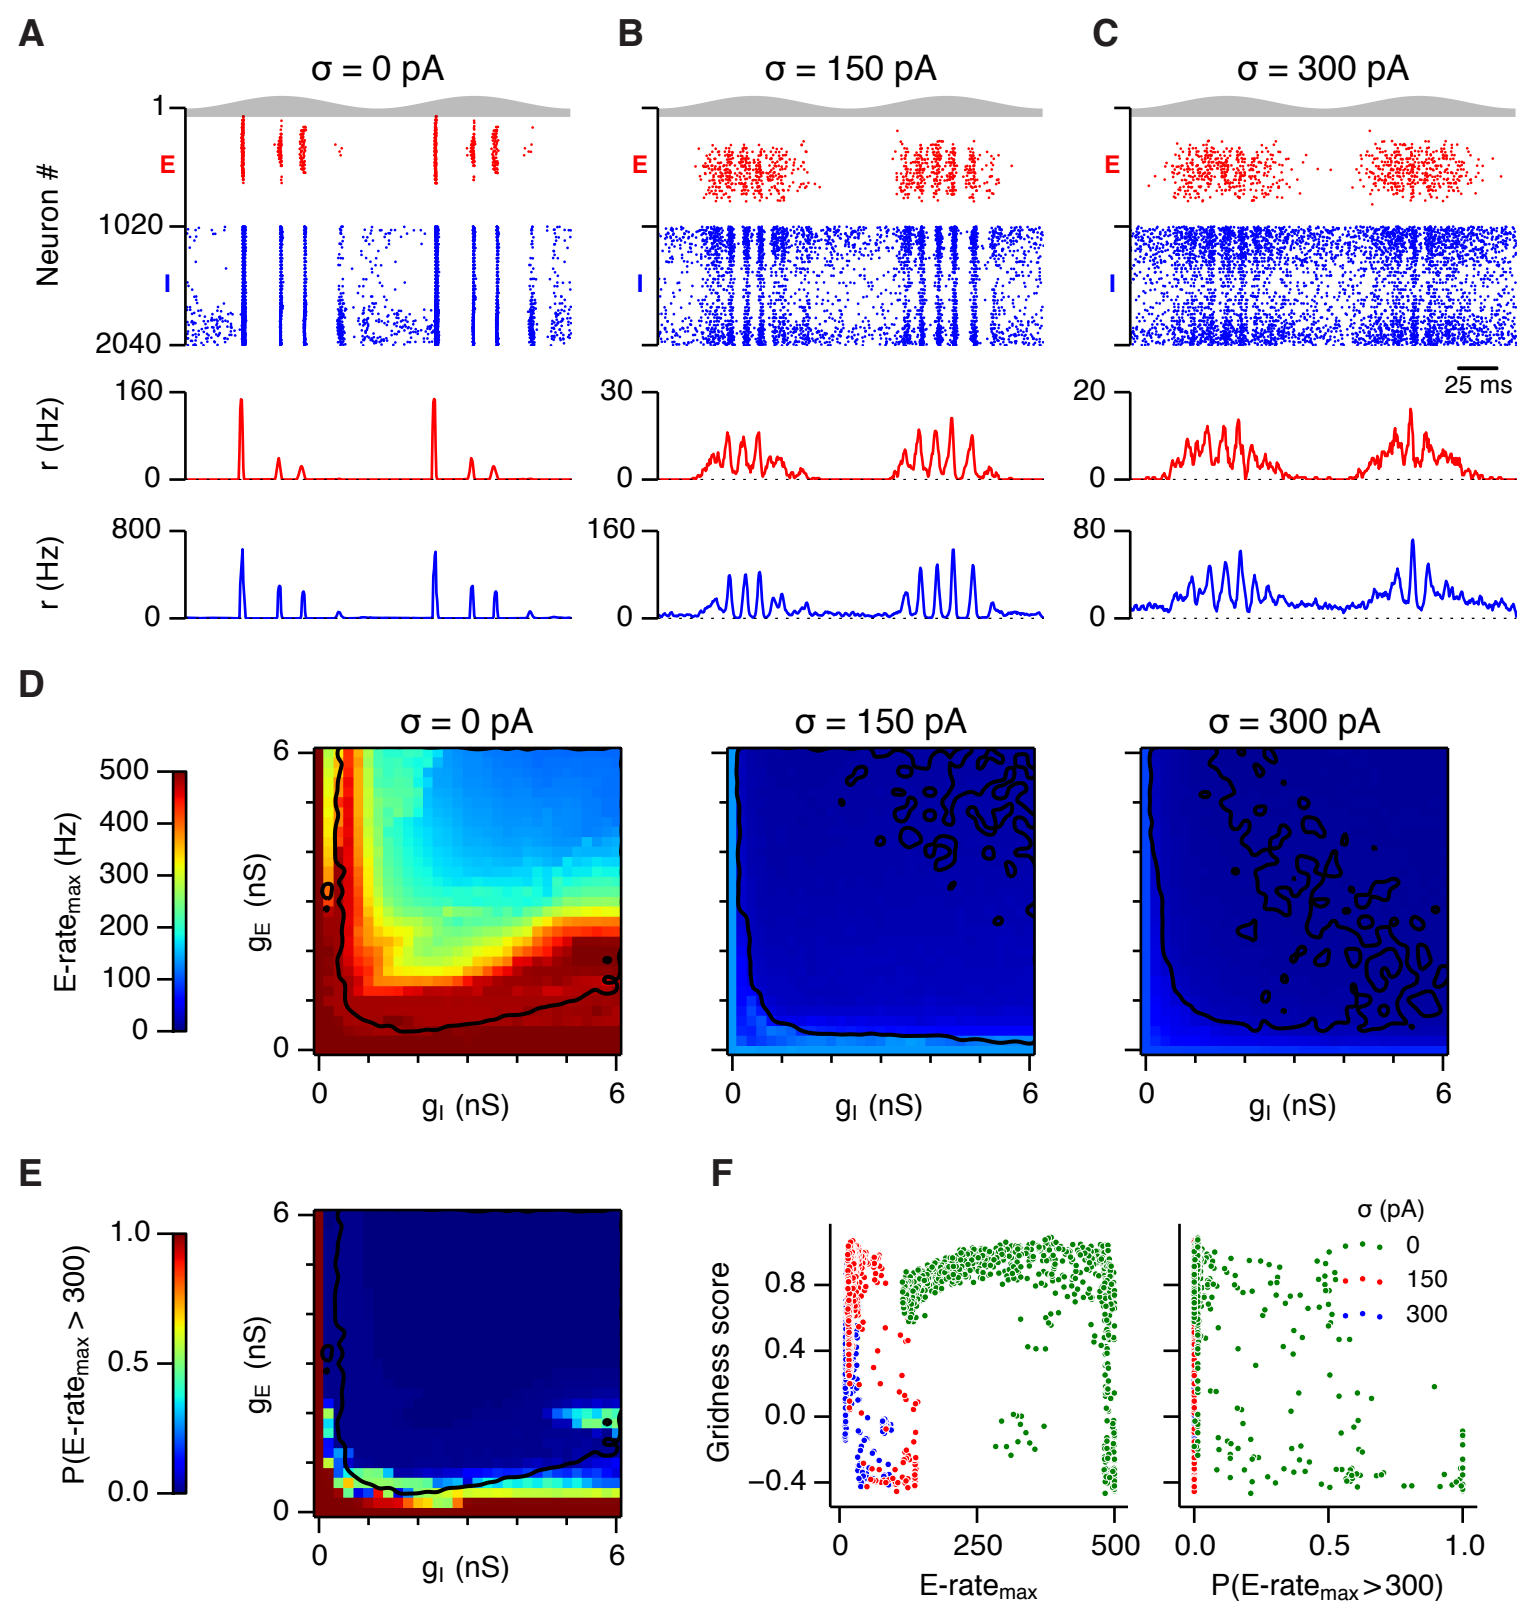

Supplement: supp [file elife-06444-supp-v1.zip]

**A**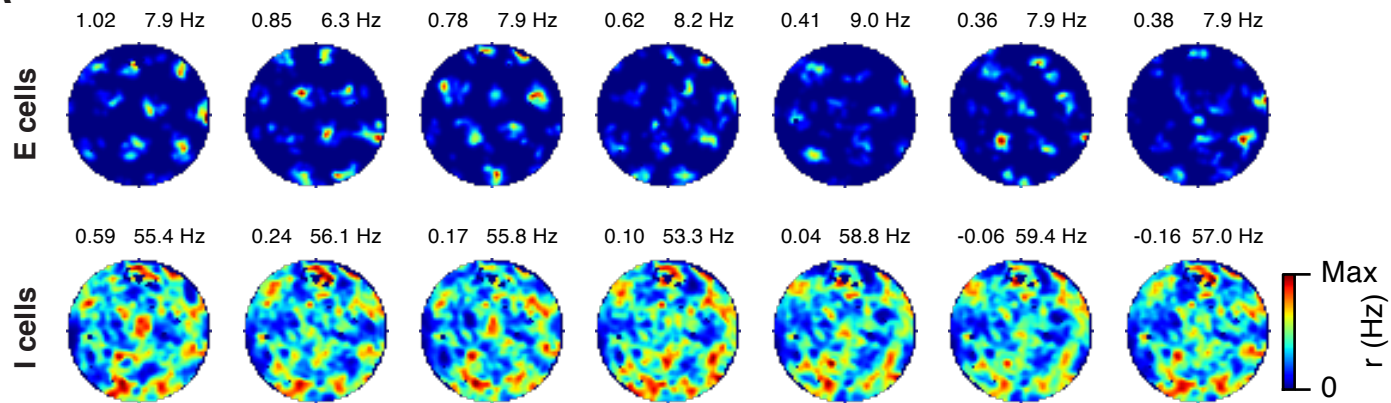**B**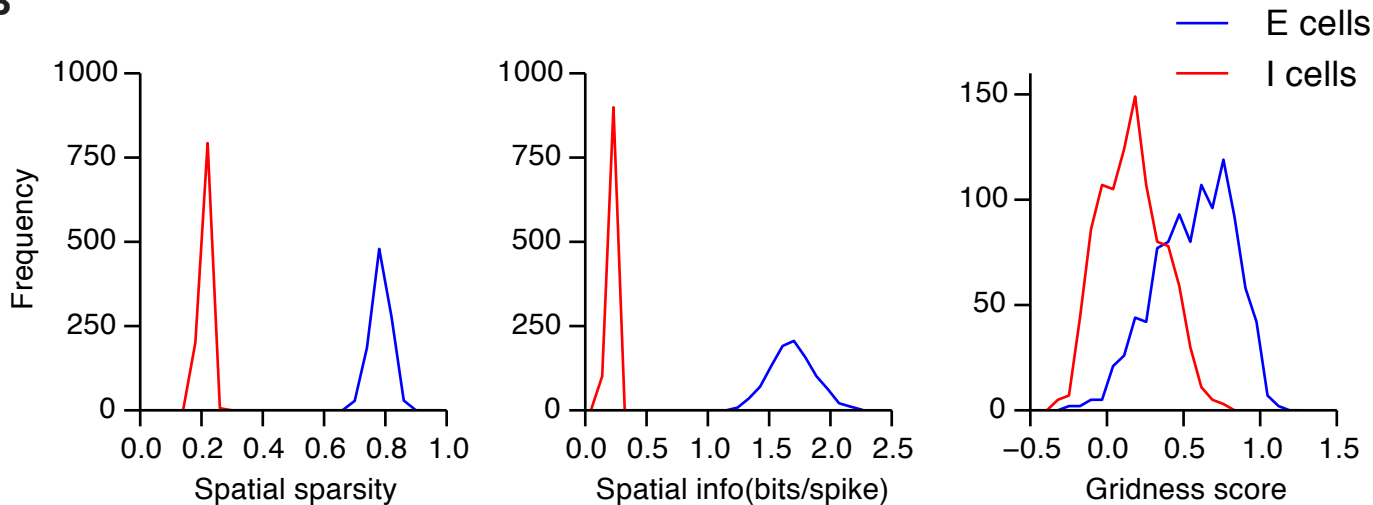

Supplement: supp [file elife-06444-supp-v1.zip]

**A** $\sigma = 0$  pA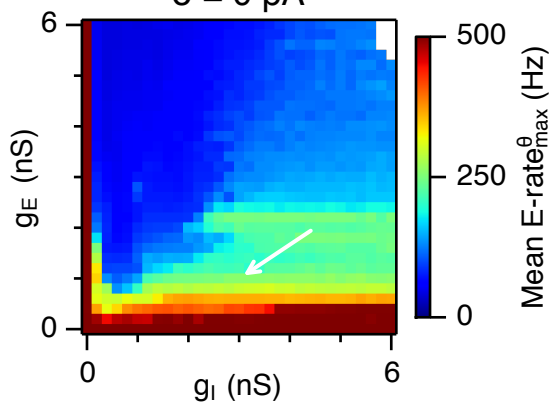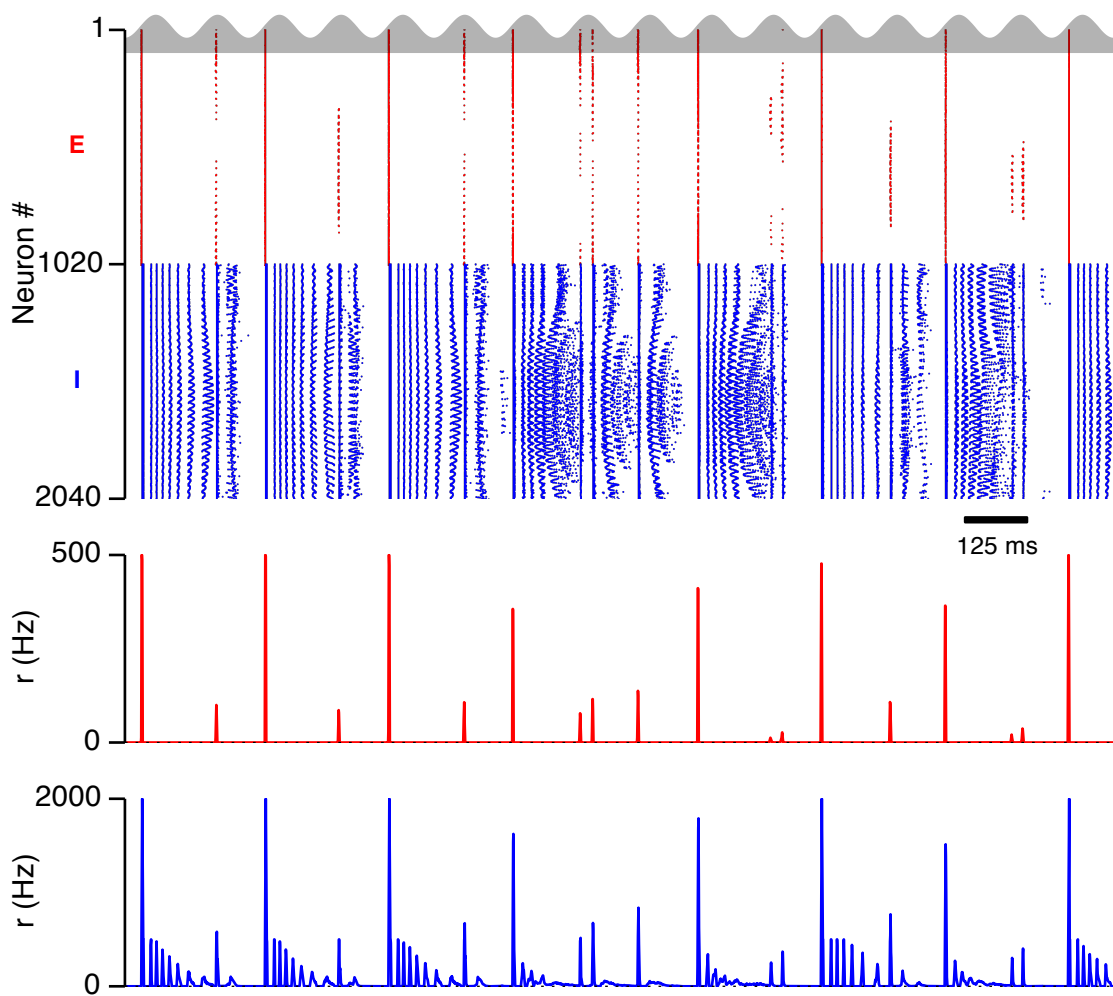

**B** $\sigma = 150 \text{ pA}$ 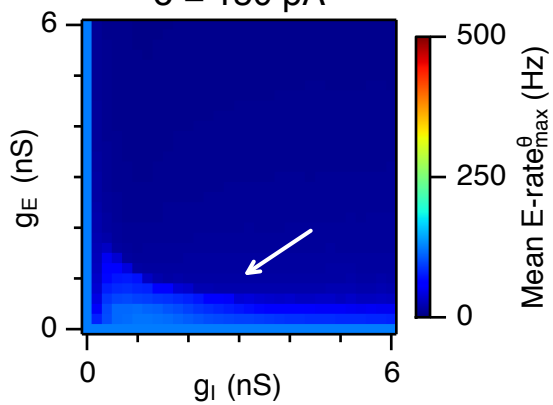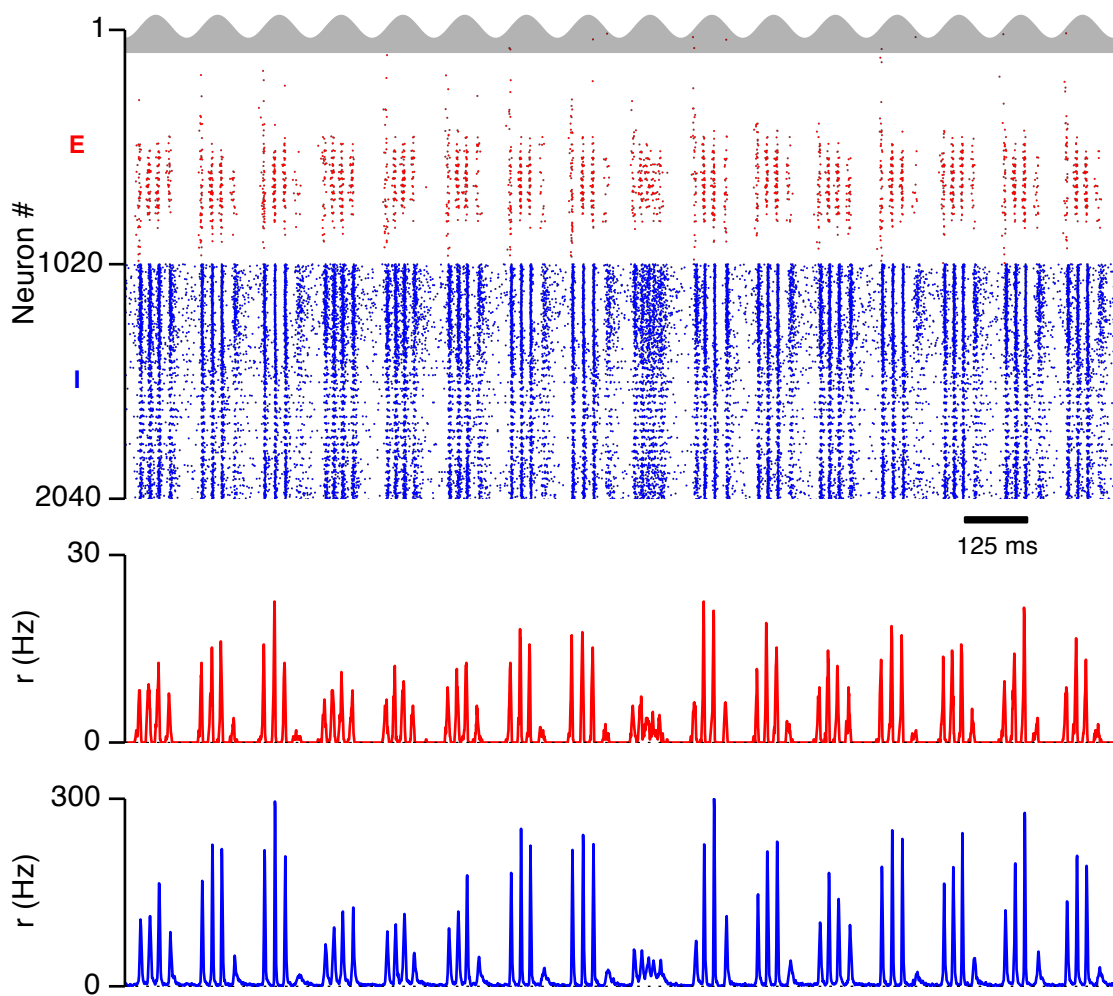

**C** $\sigma = 300$  pA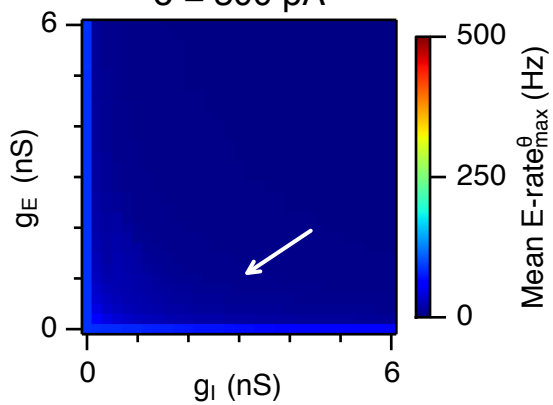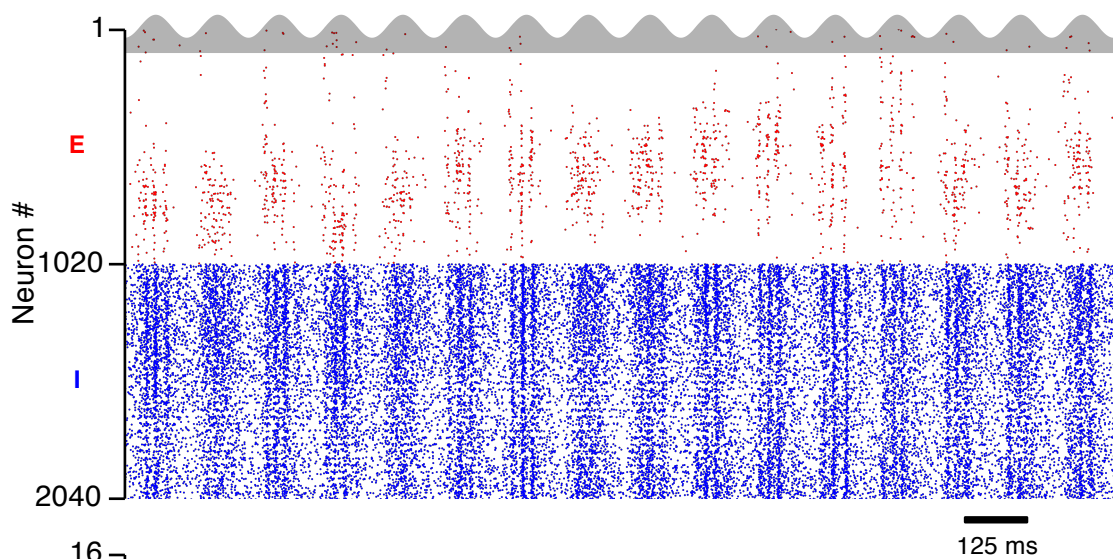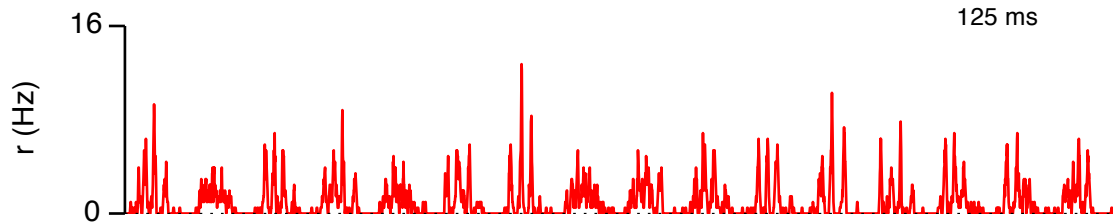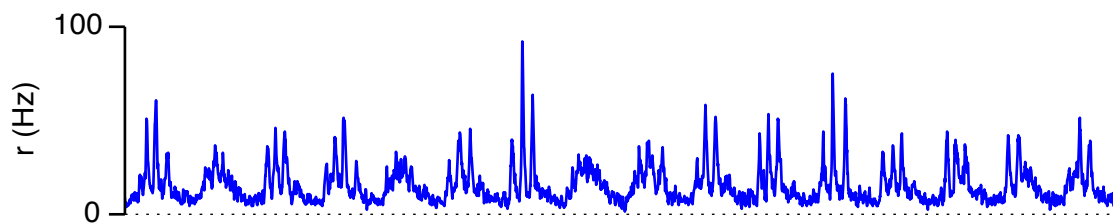

Supplement: supp [file elife-06444-supp-v1.zip]

**A**

1<sup>st</sup> autocorrelation  
peak

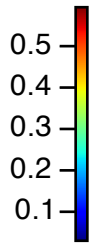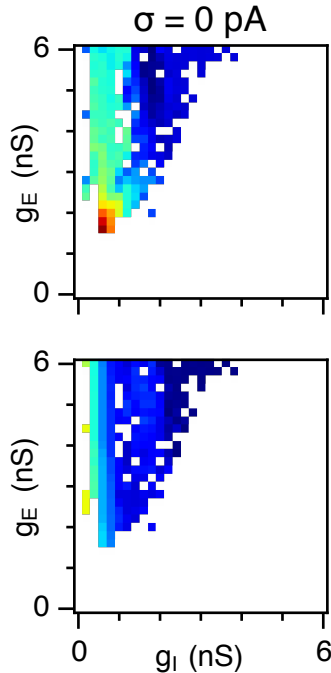**B**

$\sigma = 150$  pA

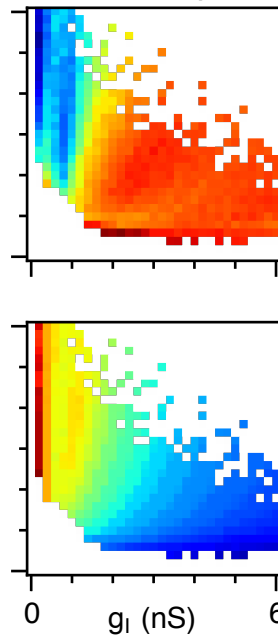**C**

$\sigma = 300$  pA

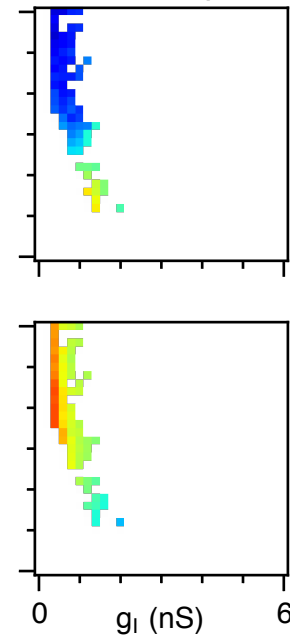

Oscillation  
frequency (Hz)

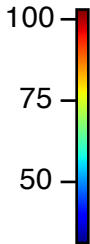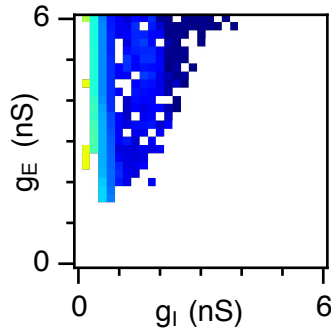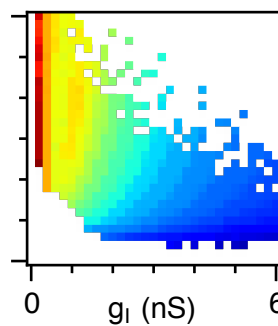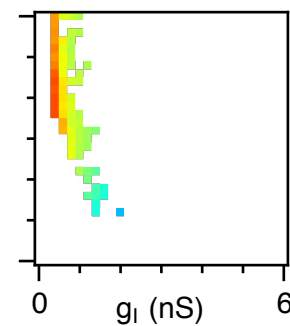

Supplement: supp [file elife-06444-supp-v1.zip]

**A**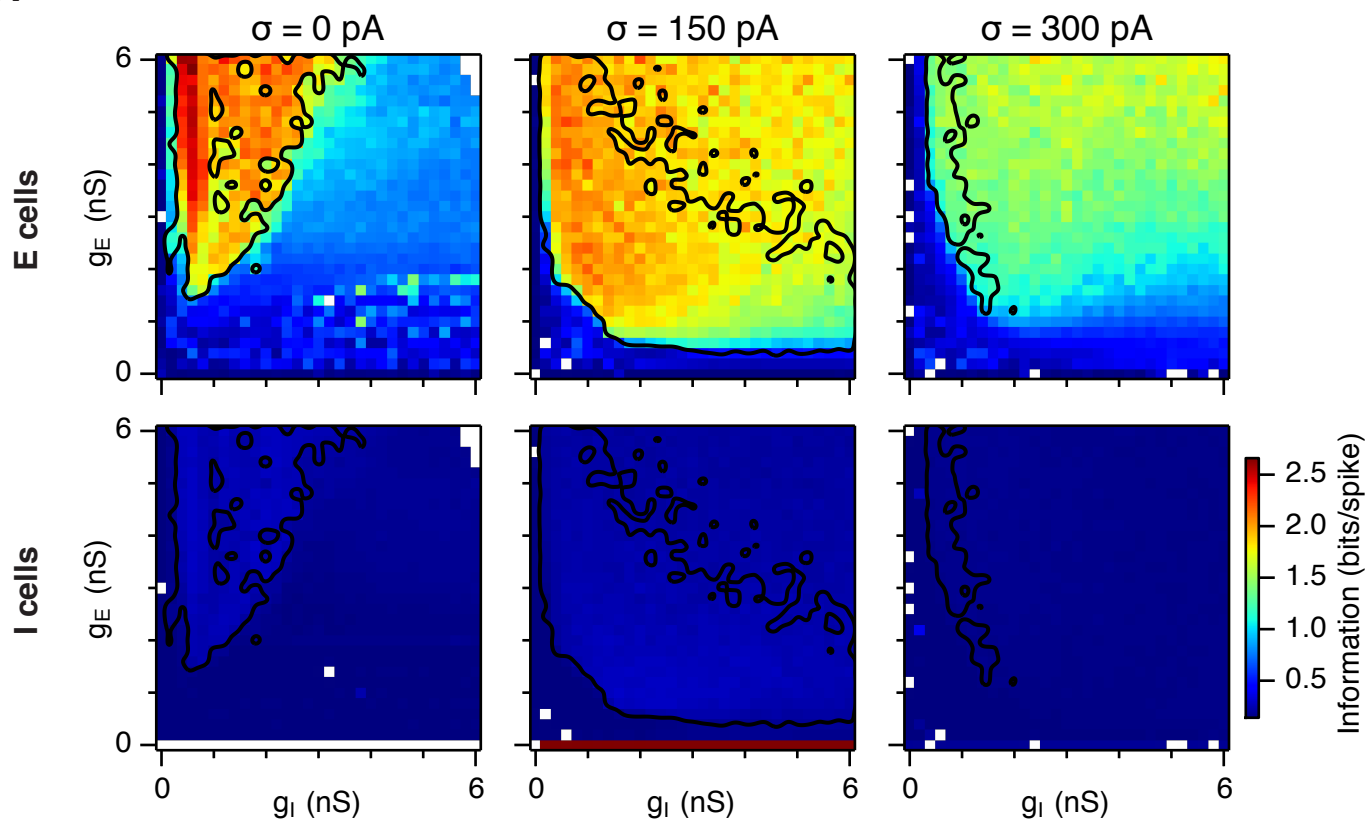**B**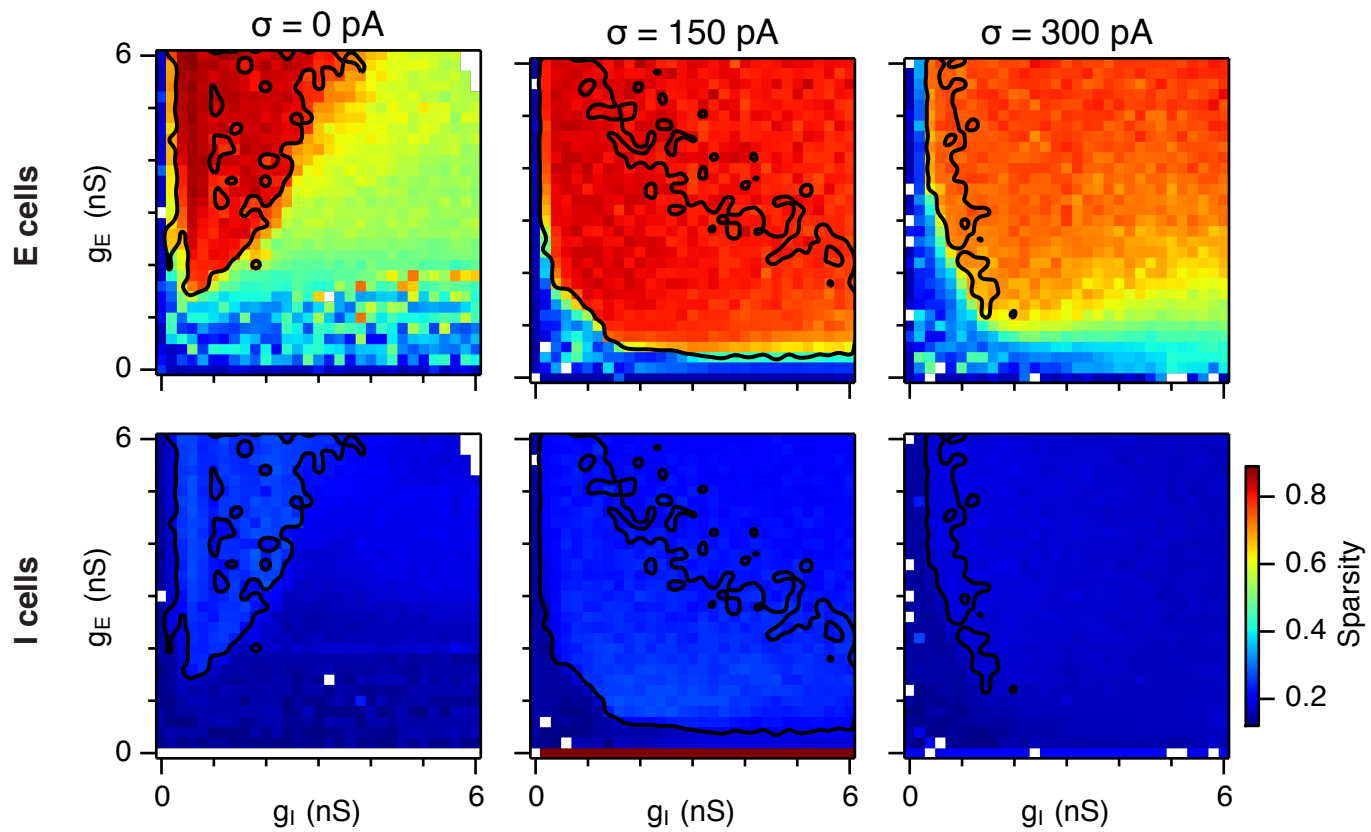

Supplement: supp [file elife-06444-supp-v1.zip]

**A**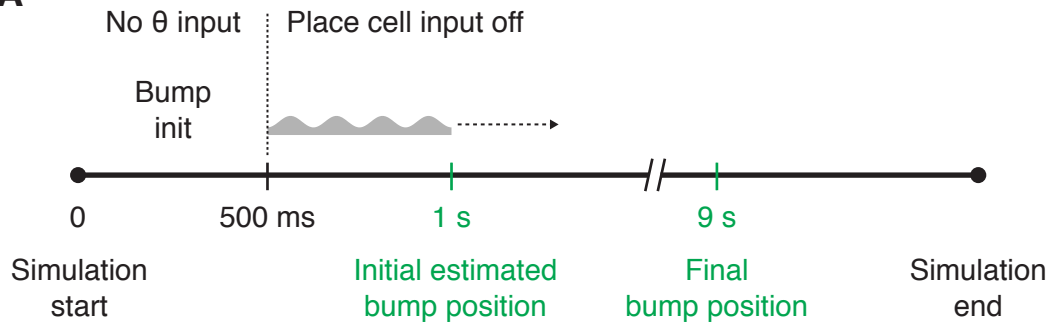**B**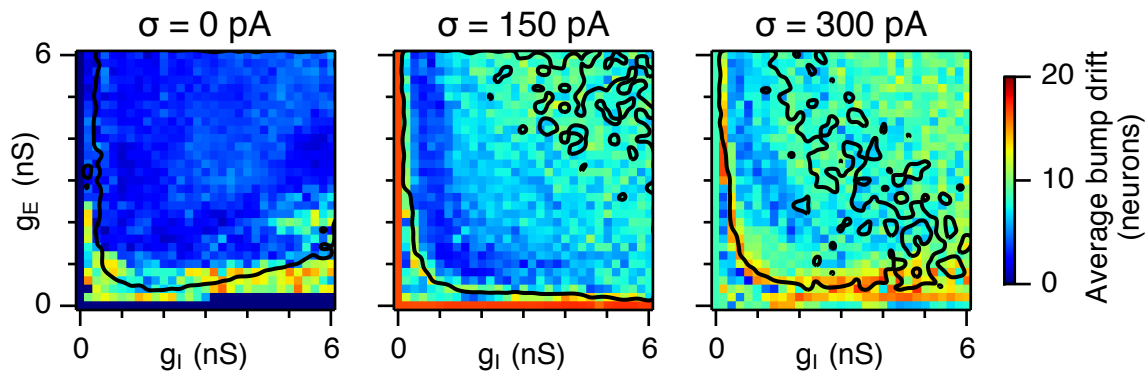

Supplement: supp [file elife-06444-supp-v1.zip]

**A** $\sigma = 0$  pA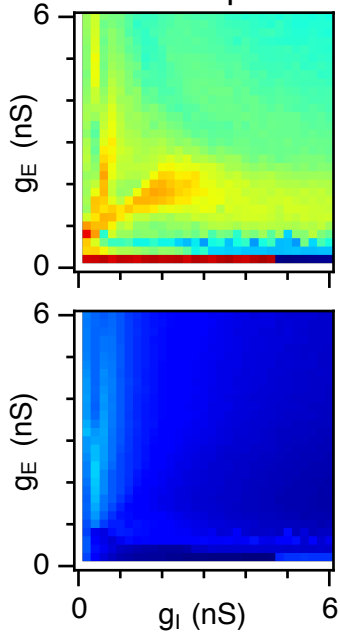**B** $\sigma = 150$  pA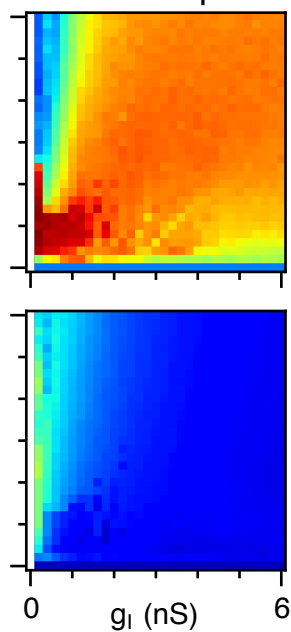**C** $\sigma = 300$  pA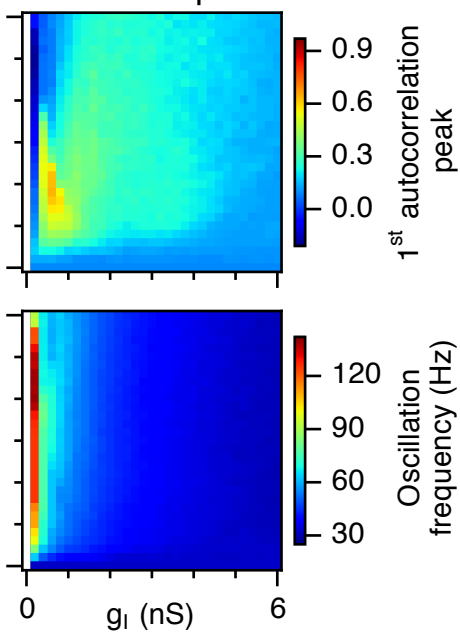

Supplement: supp [file elife-06444-supp-v1.zip]

**A**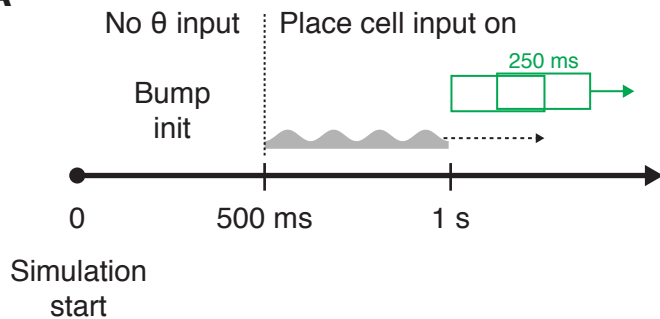**B**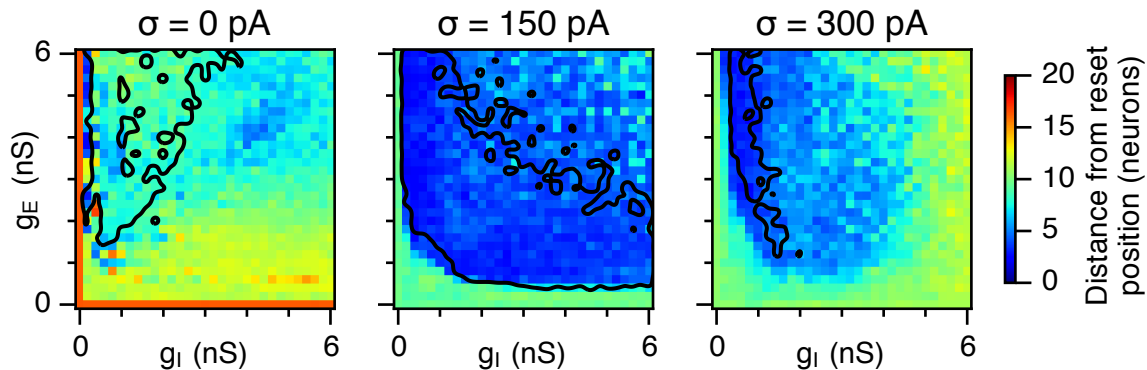

Supplement: supp [file elife-06444-supp-v1.zip]

**A**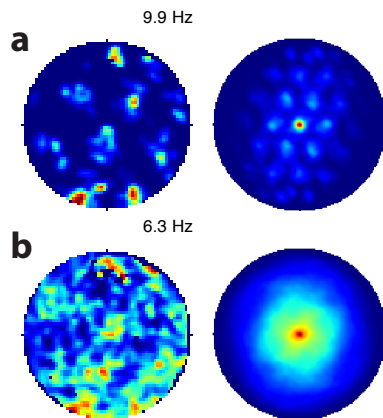**B**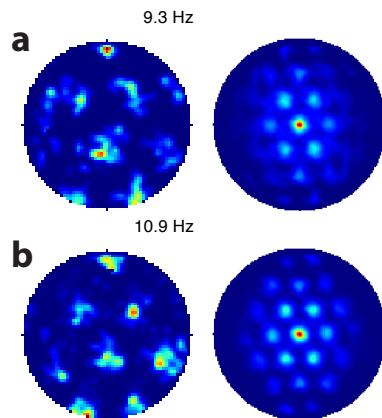**C**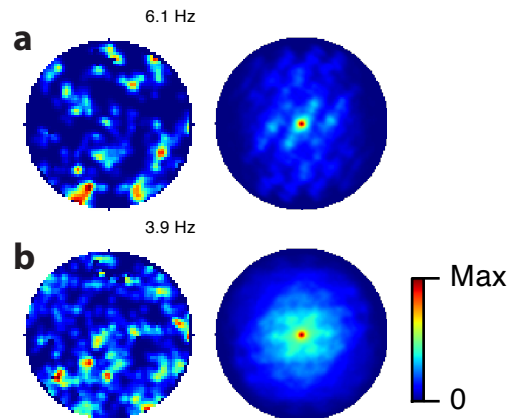**D**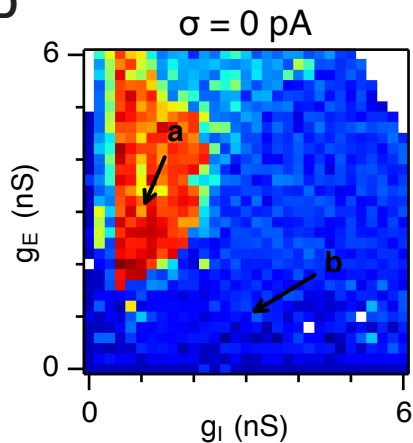**E**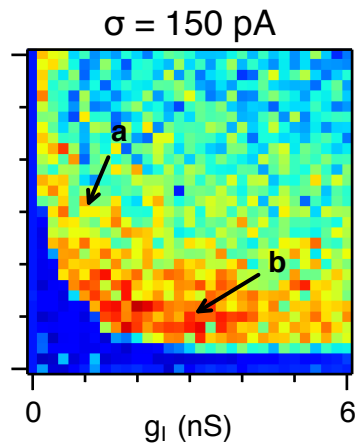**F**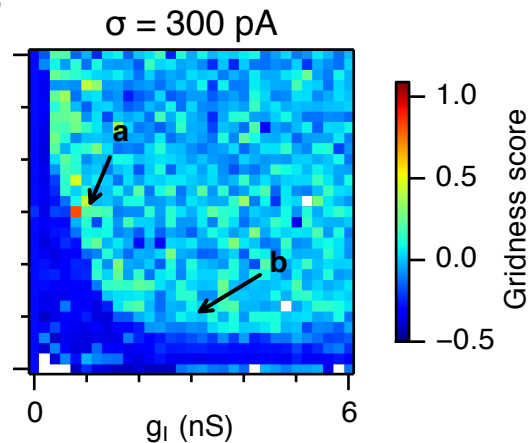

Supplement: supp [file elife-06444-supp-v1.zip]

**A**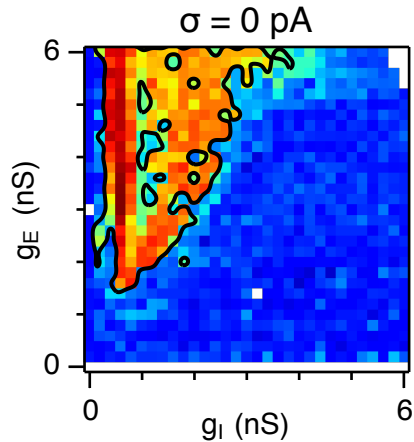**B**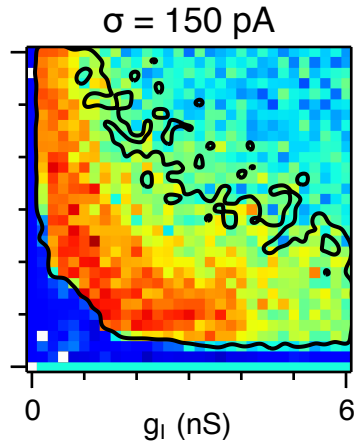**C**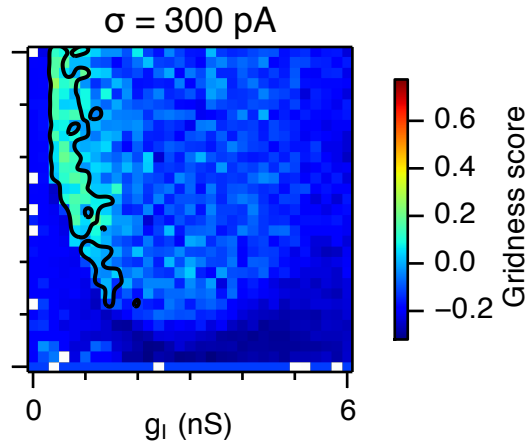

Supplement: supp [file elife-06444-supp-v1.zip]

**A**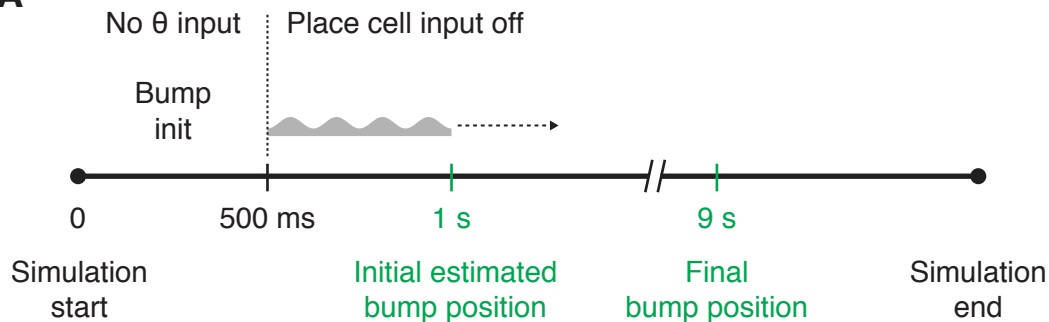**B**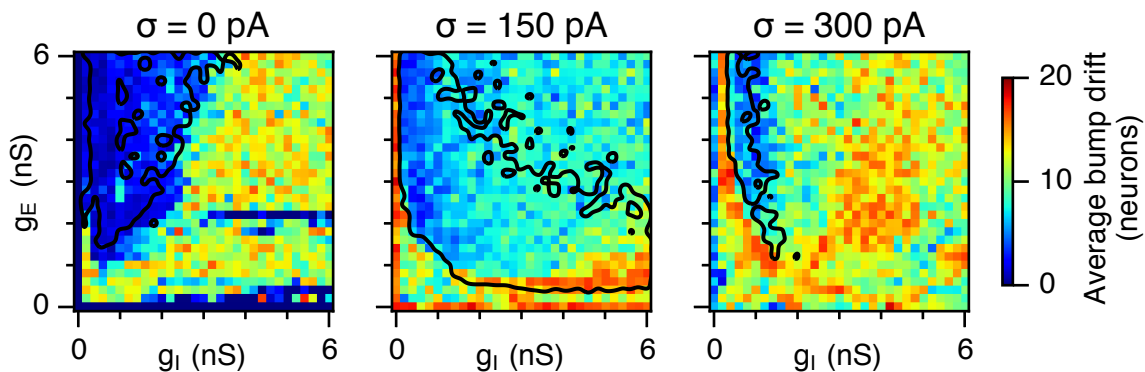

Supplement: supp [file elife-06444-supp-v1.zip]

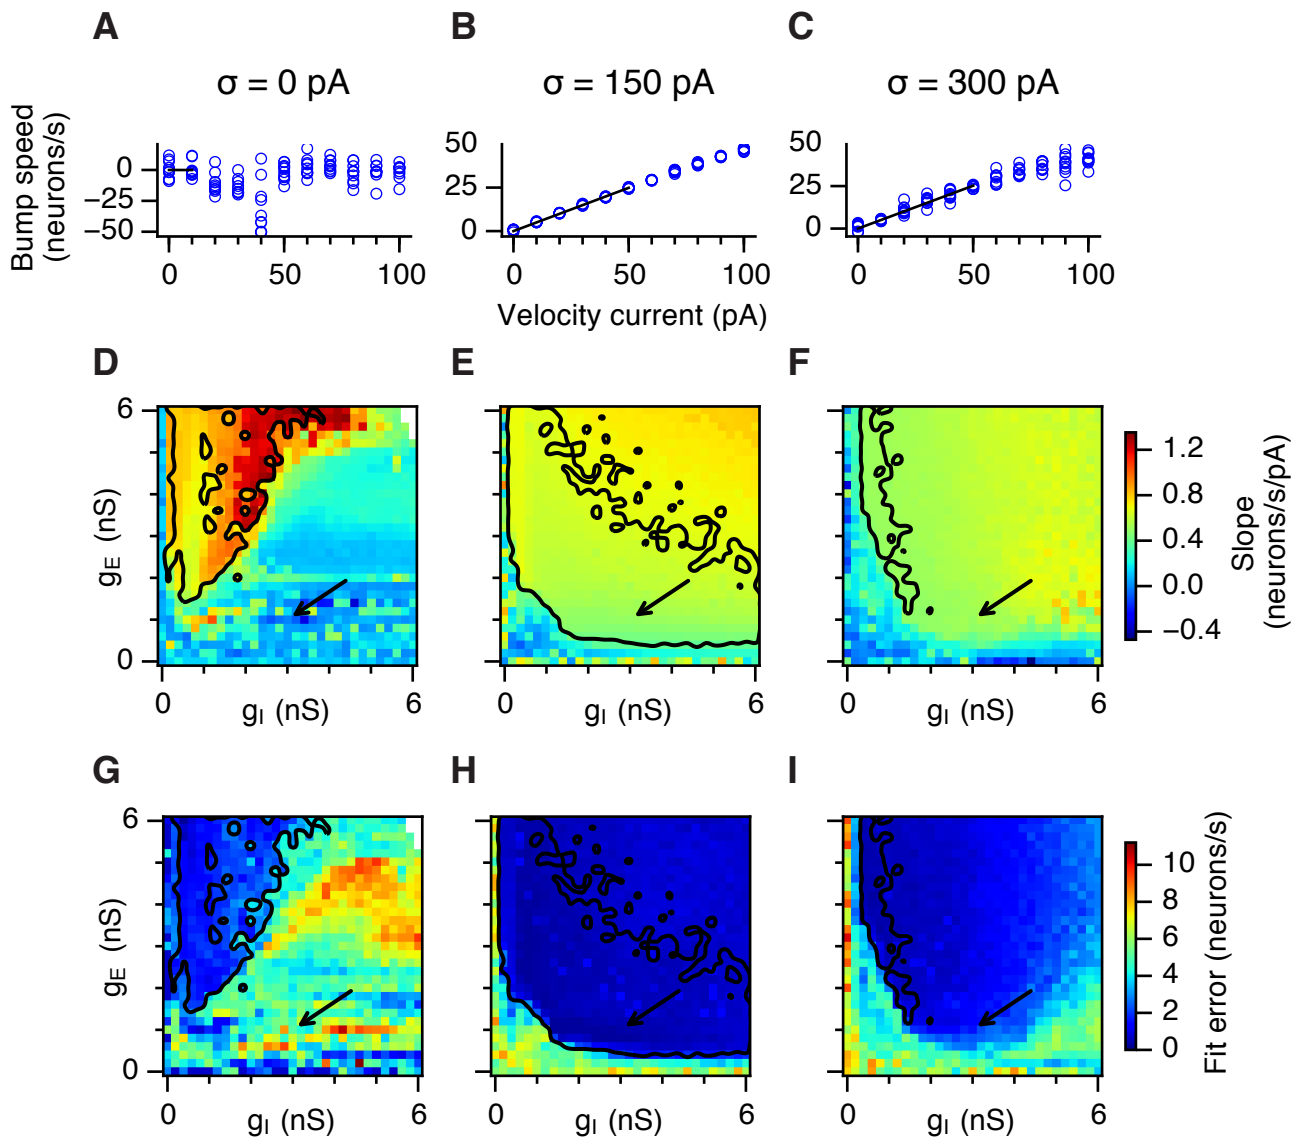

Supplement: supp [file elife-06444-supp-v1.zip]

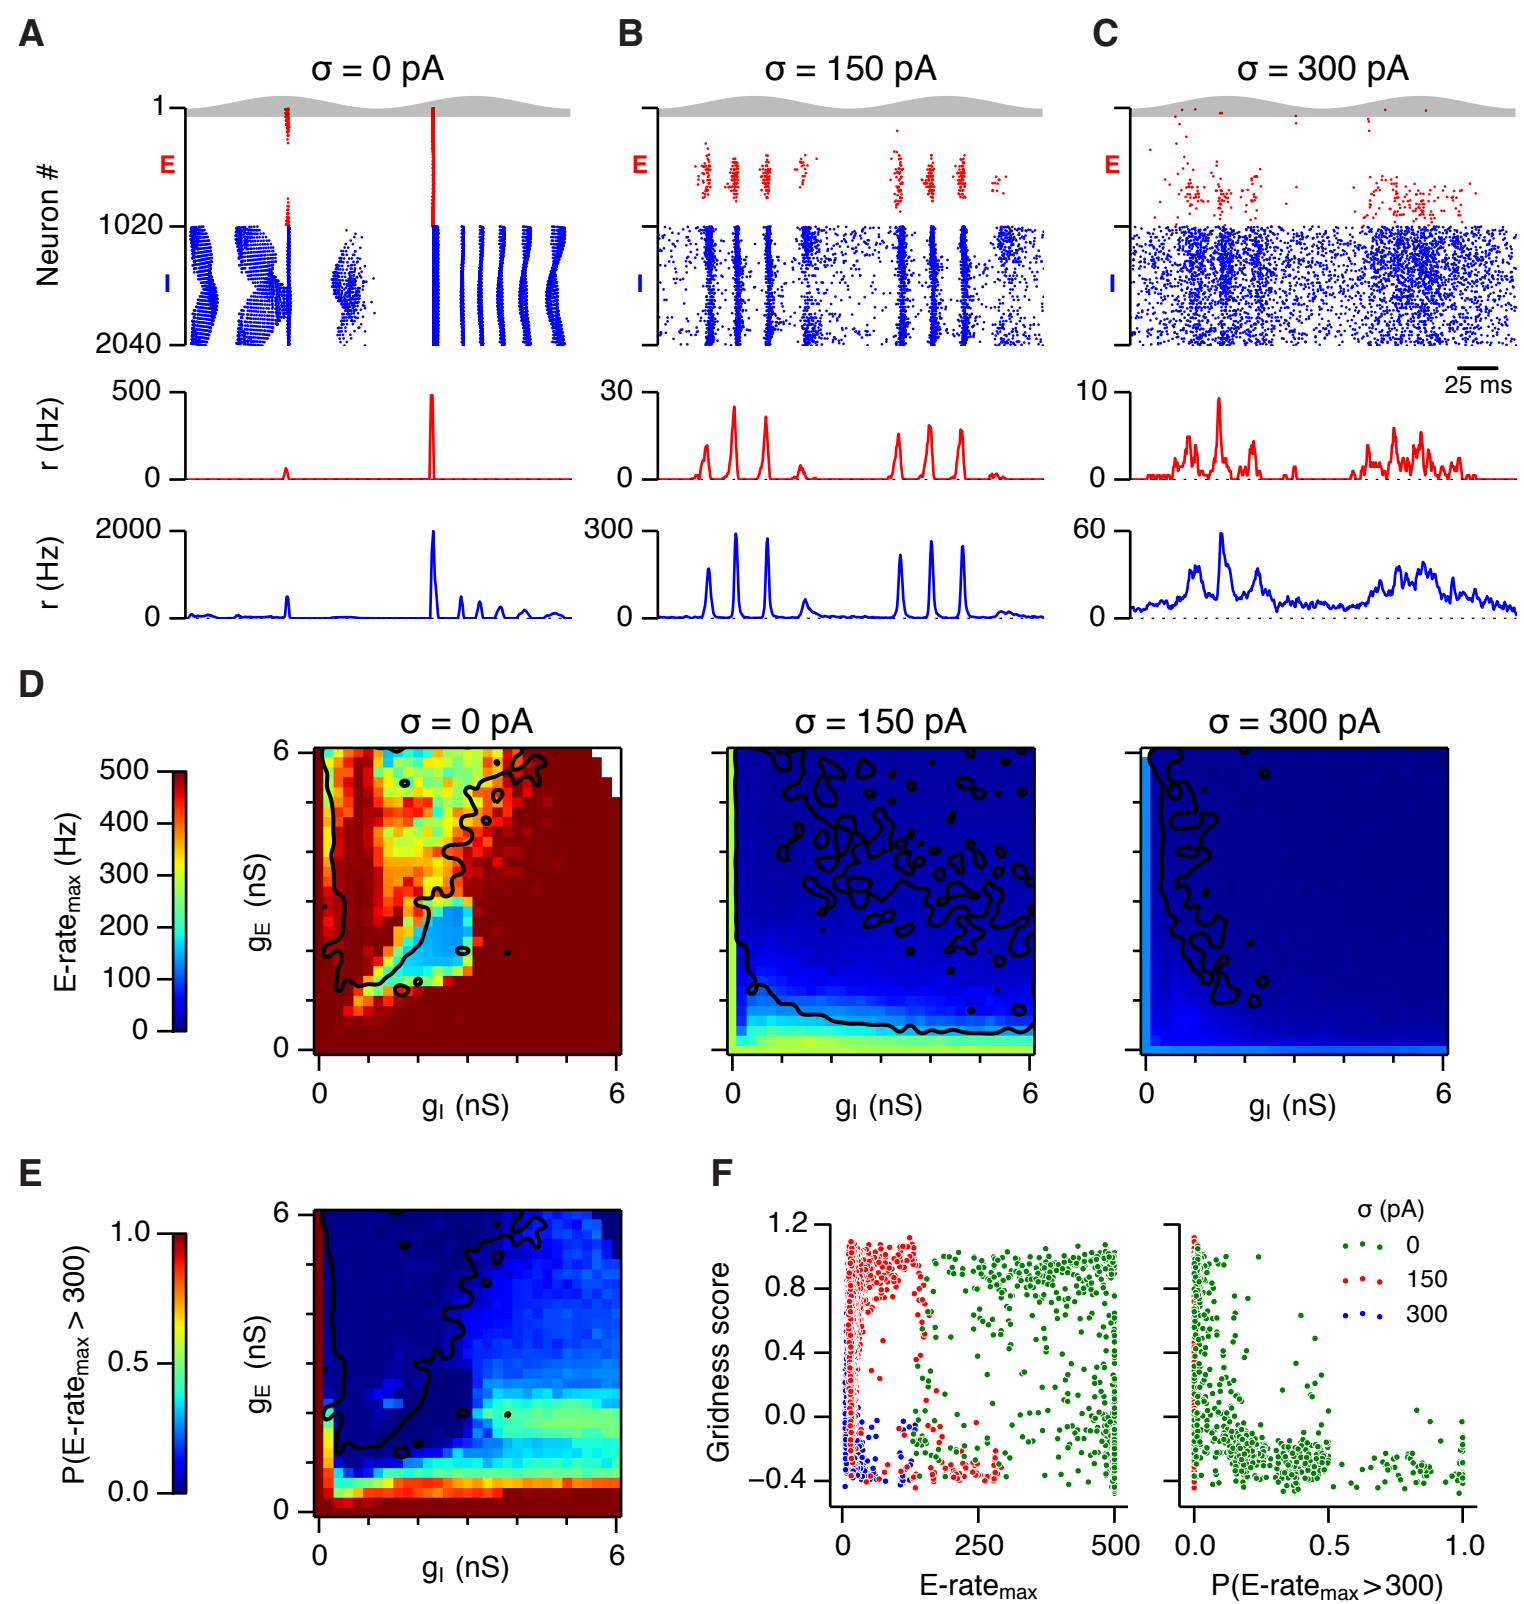

Supplement: supp [file elife-06444-supp-v1.zip]

**A**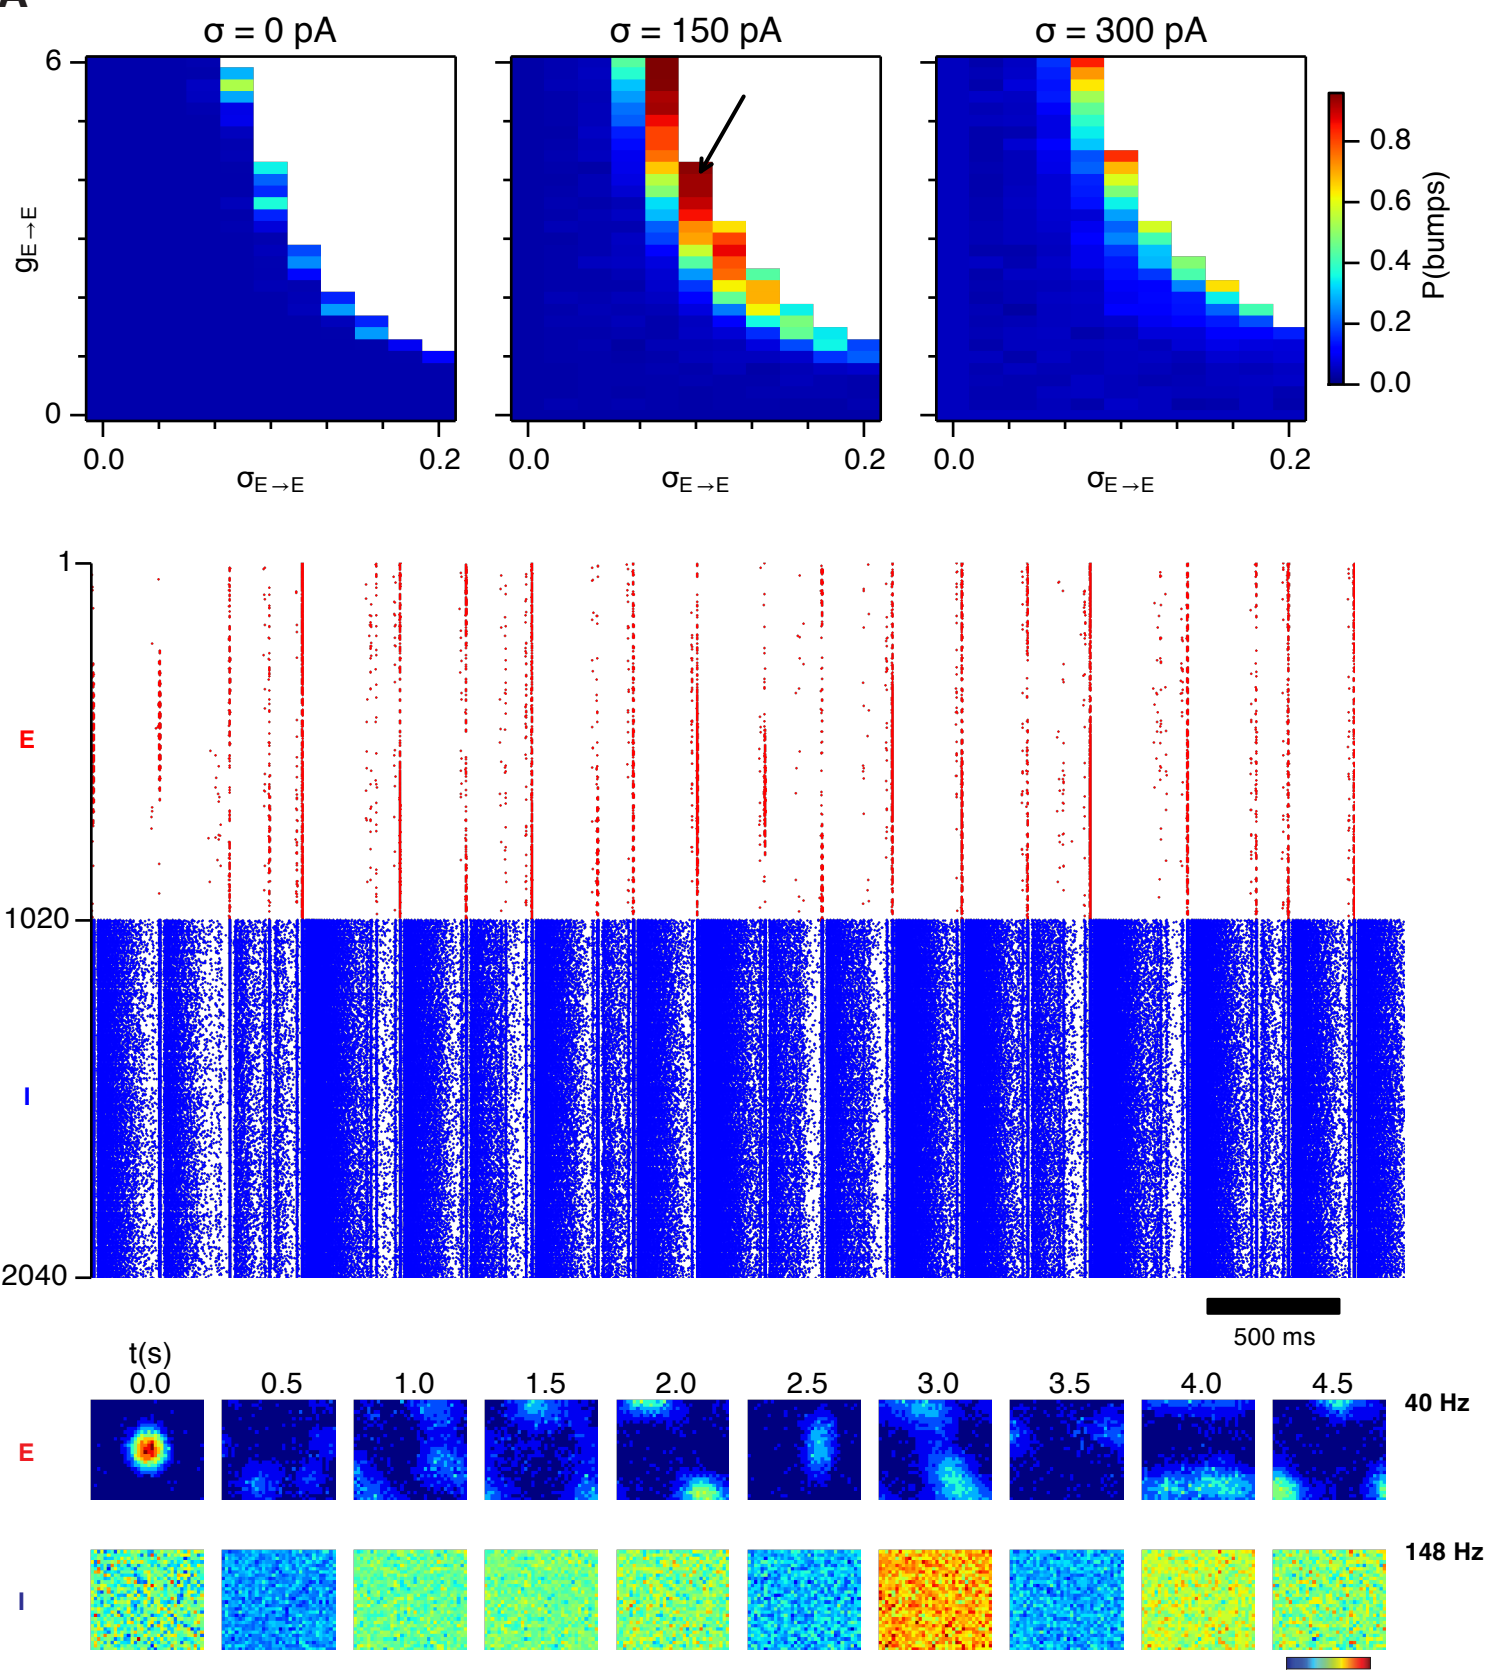

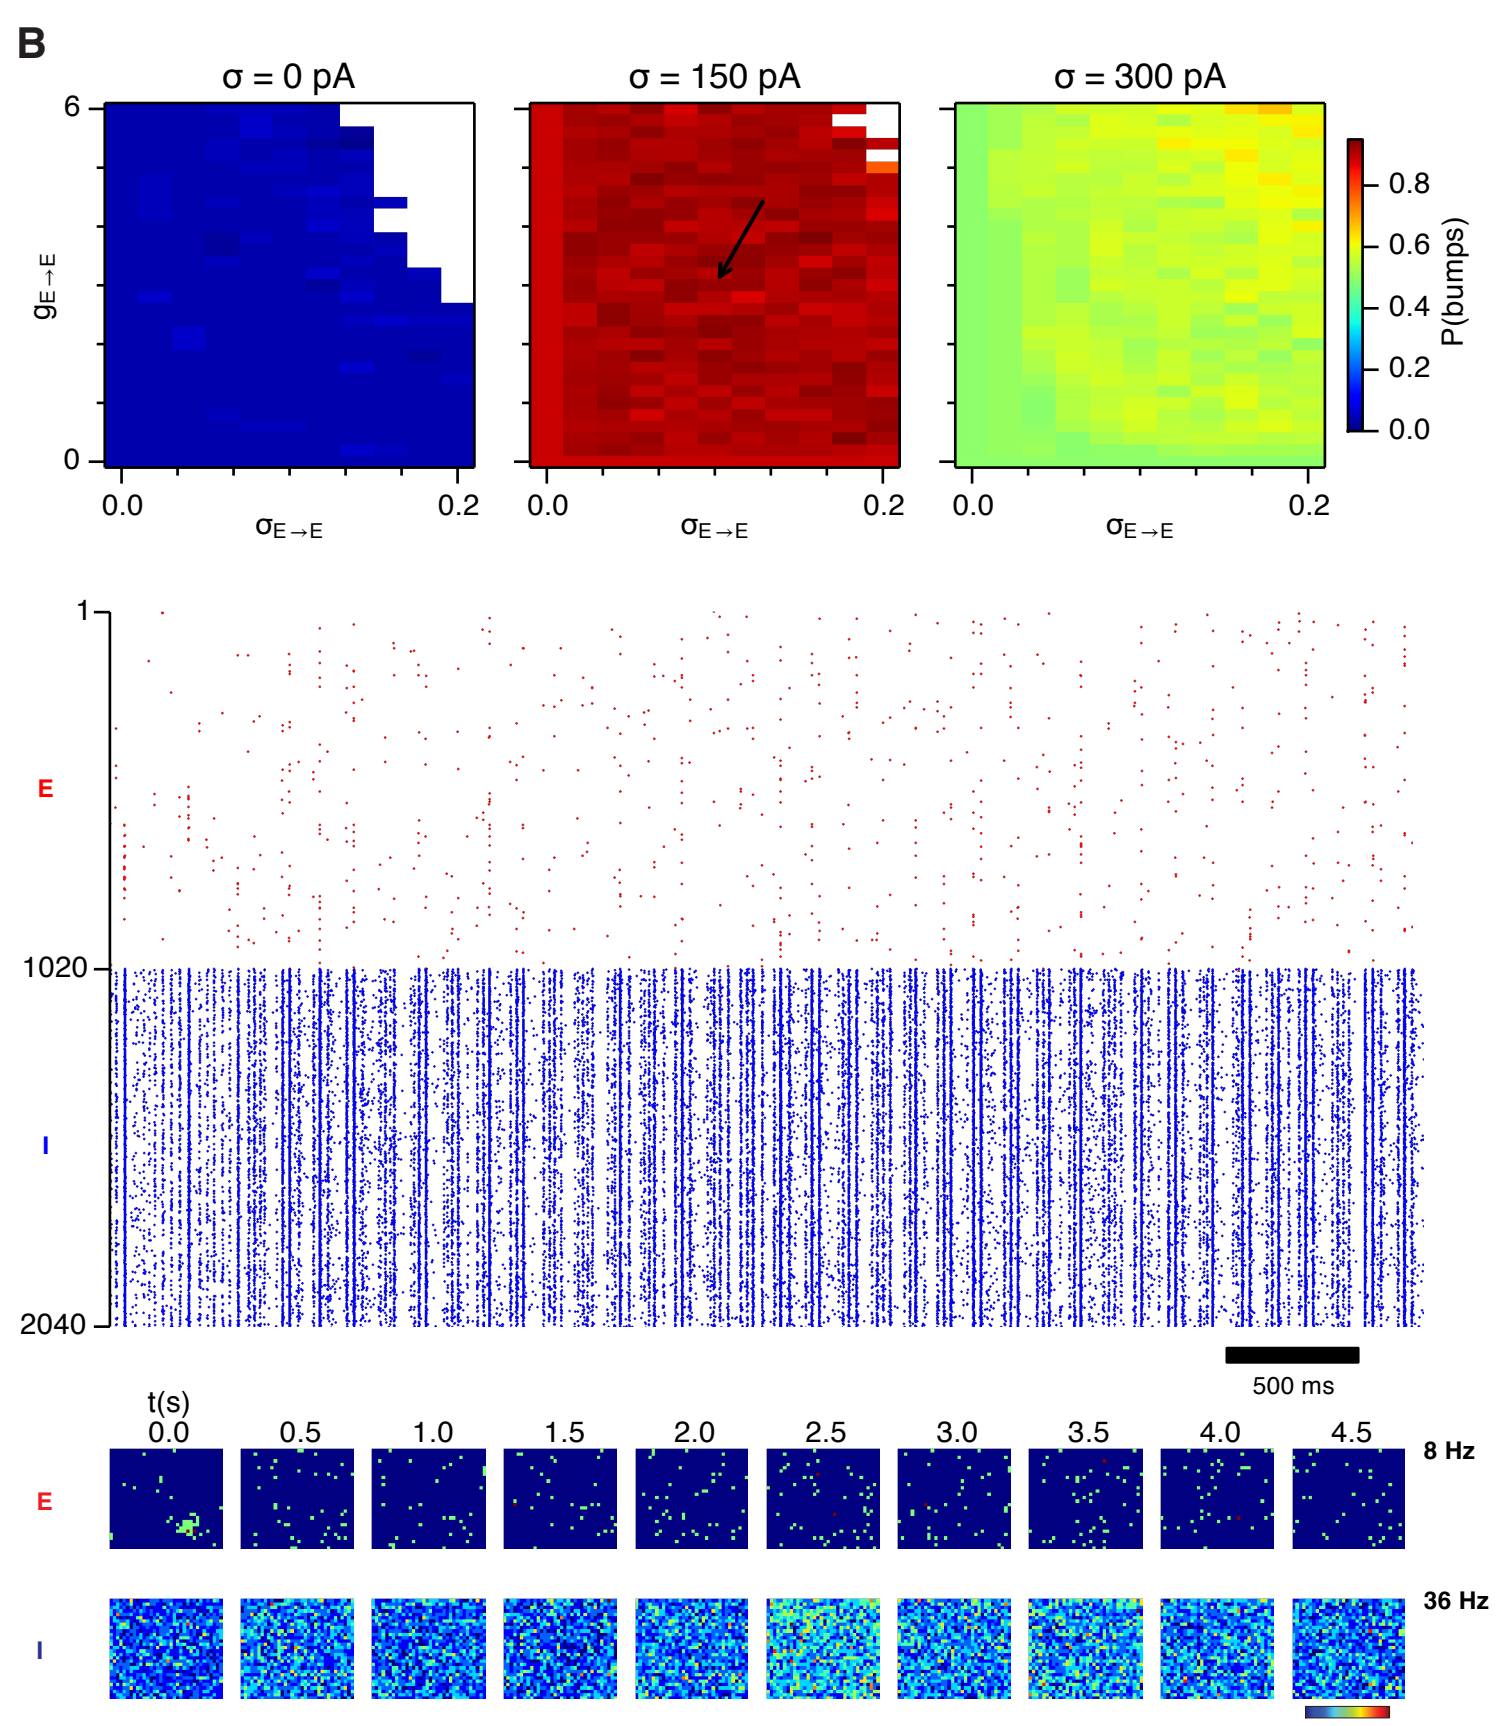

**C**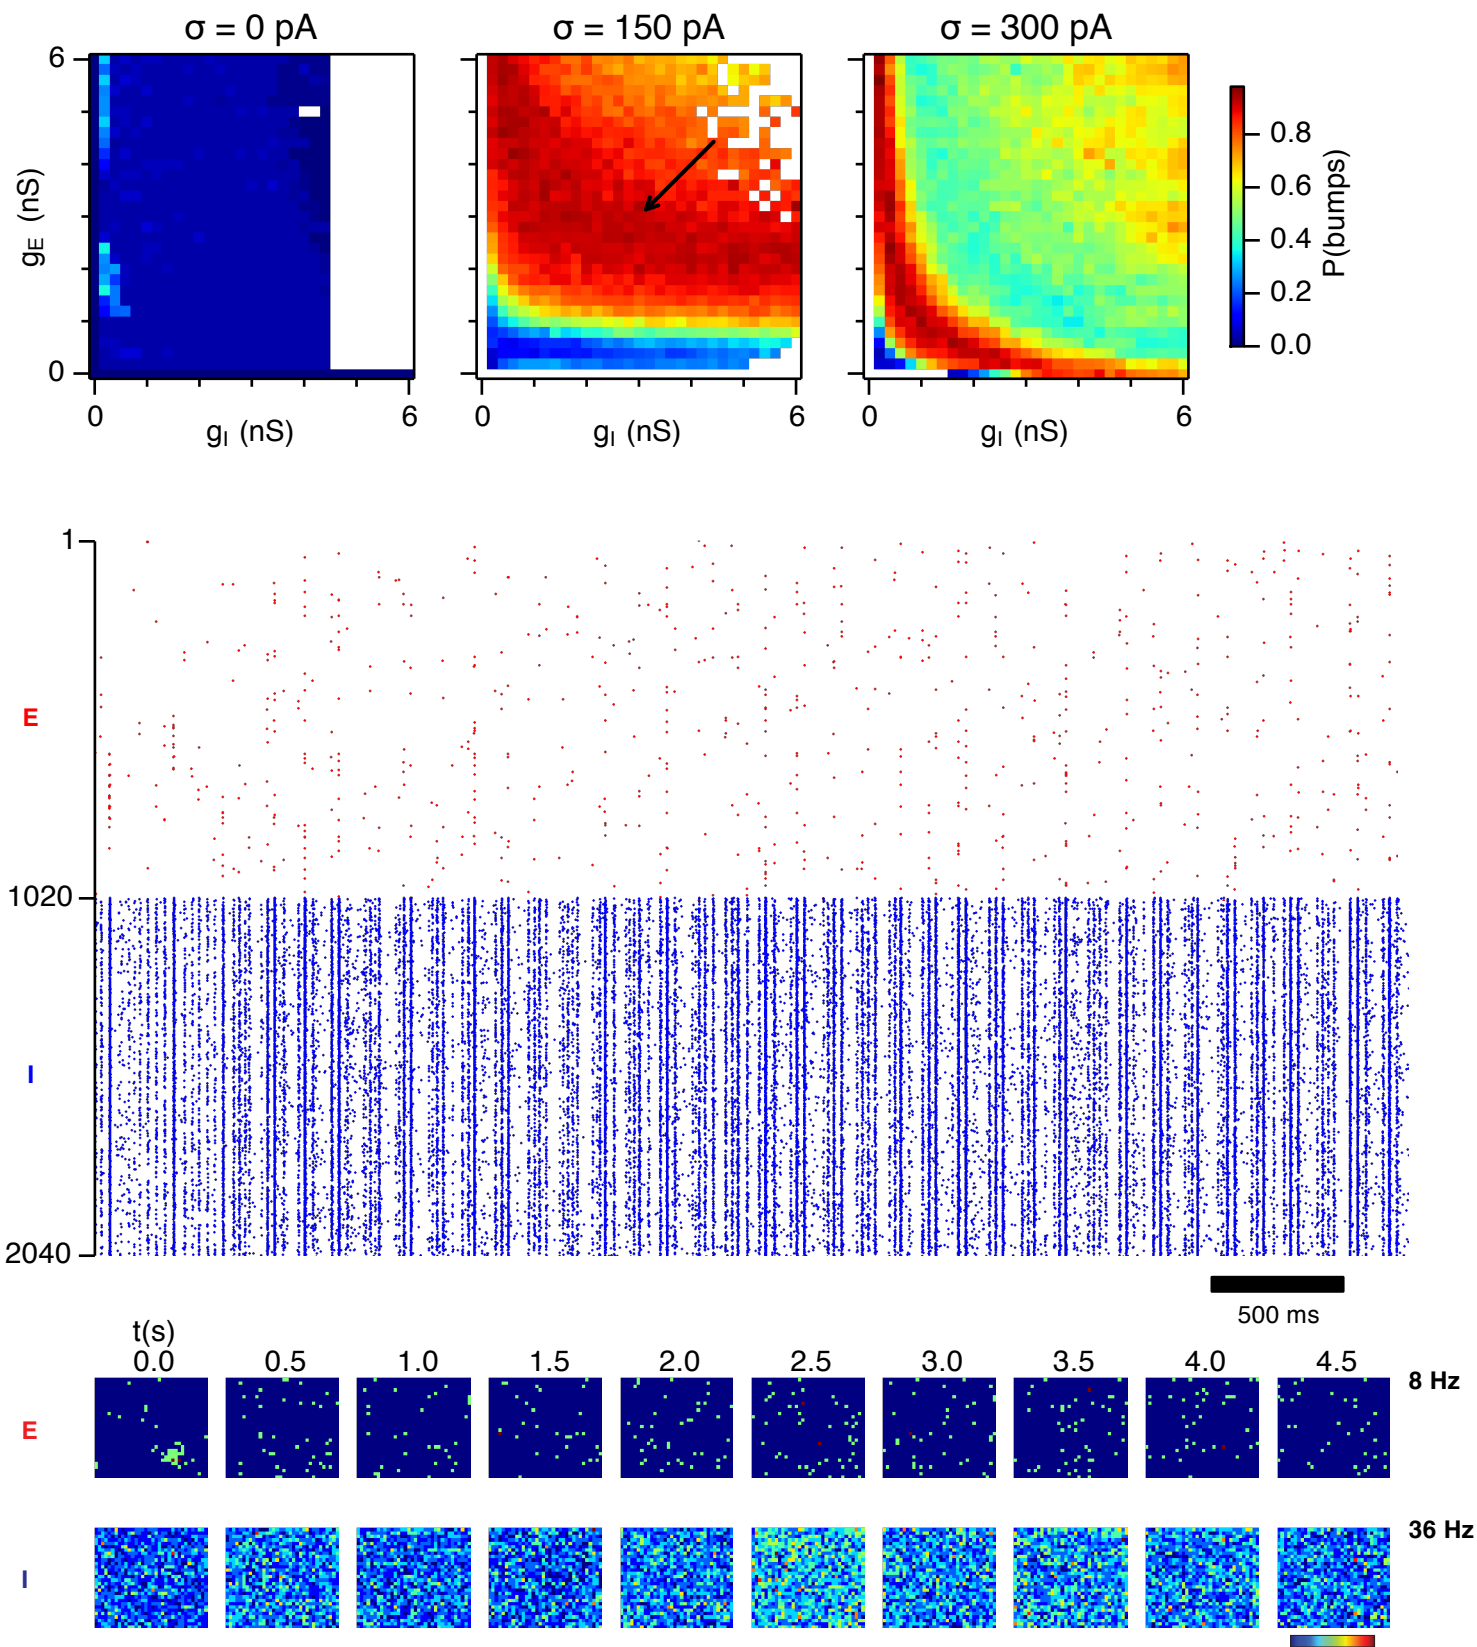

Supplement: supp [file elife-06444-supp-v1.zip]
